# Supplementary material
Source: Research Square preprint supplement (doi:10.21203/rs.3.rs-10098316/v1)
Supplement: Supplementary file 1 [file efa5e6d7b39ba033beb6cd07.docx]

**Supporting Information**

Synthesis, fluorescence properties, and electrochemical behavior of highly substituted imidazole/benzofuran hybrid derivatives

Erfan Jalilzadeh-Galeh1, Zarrin Ghasemi1,*, Somayeh Rashtabad Jadidi1, Farima Shiri1

*a Department of Organic Chemistry and Biochemistry, Faculty of Chemistry, University of Tabriz, 51666-16471, Tabriz, Iran*

z.ghasemi@tabrizu.ac.ir

**1. Physical characteristics and spectral data of 2a-d compounds:**

**1.1. Ethyl 5-(2,4,5-triphenyl-1*H*-imidazol-1-yl)benzofuran-2-carboxylate (2a)**

White solid (0.45 g, 94%); m.p. 117 oC; Rf: 0.24 (hexane: EtOAc 16:4 v/v); FT-IR (KBr, ν, cm-1): 3059, 2979, 2927, 1728, 1604, 1569, 1474, 1445, 1374, 1303, 1261, 1217, 1165; 1H NMR (400 MHz, CDCl3, ppm): 1.45-1.49 (t, 3H, OCH2C**H3**), 4.47- 4.52 (m, 2H, OC**H2**CH3), 7.15-7.91 (m, 19H, Ar-H); 13C NMR (100 MHz, CDCl3, ppm): 14.4 (OCH2**C**H3), 61.9 (O**C**H2CH3), 113.0, 113.7, 122.7, 126.8, 127.4, 127.5, 128.0, 128.2, 128.3, 128.4, 128.5, 129.0 ,130.5, 130.6, 131.2, 133.3, 134.4, 138.4, 147.3, 154.6, 159.1 (O-**C**=O). Anal. Calcd for: C32H24N2O3: C, 79.32; H, 4.99; N, 5.78; Found: C, 79.01; H, 5.10; N, 5.83.

**1.2. Ethyl 5-[4,5-diphenyl-2-(*p*-tolyl)-1*H*-imidazol-1-yl]benzofuran-2-carboxylate (2b)**

White solid (0.43 g, 89%); m.p. 120 oC; Rf: 0.34 (hexane: EtOAc 16:4 v/v); FT-IR (KBr, ν, cm-1): 3058, 2979, 2921, 1727, 1570, 1473, 1374, 1301, 1264, 1218, 1170; 1H NMR (400 MHz, CDCl3, ppm): 1.45-1.49 (t, 3H, 7.5 Hz, OCH2C**H3**), 2.35 (s, 3H, PhC**H3**), 4.47- 4.52 (q, 2H, 7.5 Hz, OC**H2**CH3), 7.10-7.69 (m, 18H, Ar-H); 13C NMR (100 MHz, CDCl3, ppm): 14.4 (OCH2**C**H3), 21.3 (Ph**C**H3), 61.8 (O**C**H2CH3), 112.9, 113.7, 122.8, 126.7, 127.4, 127.5, 127.6, 128.0, 128.2, 128.5, 128.9, 129.0 ,130.7, 131.0, 131.2, 133.4, 134.5, 138.3, 138.4, 147.2, 147.4, 154.6, 159.1 (O-**C**=O). Anal. Calcd for: C33H26N2O3: C, 79.50; H, 5.26; N, 5.62; Found: C, 79.20; H, 5.00; N, 5.77.

**2.3. Ethyl 5-[2-(4-methoxyphenyl)-4,5-diphenyl-1H-imidazol-1-yl]benzofuran-2-carboxylate (2c)**

White solid (0.43 g, 96%); m.p. 126 oC; Rf: 0.24 (hexane: EtOAc 16:4 v/v); FT-IR (KBr, ν, cm-1): 3058, 2980, 2934, 1728, 1608, 1573, 1476, 1445, 1375, 1300, 1252, 1178; 1H NMR (250 MHz, CDCl3, ppm): 1.37-1.43 (t, 3H, 7.5 Hz, OCH2C**H3**), 3.74 (s, 3H Ph-OC**H3**), 4.39- 4.47 (m, 2H, 7.5 Hz, OC**H2**CH3), 6.31-7.61 (m, 18H, Ar-H); 13C NMR (65 MHz, CDCl3, ppm): 13.4 (OCH2**C**H3), 54.1 (Ph-O**C**H3), 60.8 (O**C**H2CH3), 112.0, 112.7, 114.8, 121.8, 121.9, 126.4, 127.1, 127.2, 127.5, 129.4, 129.6, 129.8, 130.1, 132.4, 133.4, 137.1, 140.6, 146.2, 150.3, 153.6, 158.1, 158.7 (O-**C**=O). Anal. Calcd for: C33H26N2O4: C, 77.03; H, 5.09; N, 5.44; Found: C, 77.21; H, 5.17; N, 5.68.

**2.4. Ethyl 5-[2-(3-nitrophenyl)-4,5-diphenyl-1H-imidazol-1-yl]benzofuran-2-carboxylate (2d)**

White solid (0.44 g, 95%); m.p. 120 oC; Rf: 0.21 (hexane: EtOAc 16:4 v/v); FT-IR (KBr, ν, cm-1): 3051, 2982, 2927, 1728, 1604, 1573, 1533, 1473, 1445, 1348, 1304, 1259, 1174; 1H NMR (250 MHz, CDCl3, ppm): 1.38-1.44 (t, 3H, 7.5 Hz, OCH2C**H3**), 4.39- 4.48 (q, 2H, 7.5 Hz, OC**H2**CH3), 6.70-8.30 (m, 18H, Ar-H); 13C NMR (65 MHz, CDCl3, ppm): 13.3 (OCH2**C**H3), 60.9 (O**C**H2CH3), 112.5, 121.7, 122.0, 122.5, 122.6, 126.1, 126.4. 126.6, 126.7, 127.1, 127.4, 127.5, 127.6, 127.9, 128.3, 128.9, 128.3, 130.0 ,130.9, 131.3, 132.8, 133.2, 137.9, 143.6, 146.6, 147.1, 153.8, 159.1 (O-**C**=O). Anal. Calcd for: C32H23N3O5: C, 72.58; H, 4.38; N, 7.94; Found: C, 72.67; H, 4.55; N, 8.02.

**2. Physical characteristics and spectral data of 3a-h compounds:**

**2.1. (*E*)- Ethyl -3-[2-hydroxy-5-(2,4,5-triphenyl-1*H*-imidazol-1-yl)phenyl]acrylates (3a)**

Light yellow solid (1.21 g, 100%); m.p. 103 oC; Rf: 0.37 (hexane: EtOAc 13:7 v/v); FT-IR (KBr, ν, cm-1): 3430, 3057, 2981, 2931, 1706, 1629, 1602, 1505, 1439, 1289, 1165; 1H NMR (250 MHz, CDCl3, ppm): 1.27-1.32 (t, *J*= 7.5 Hz, 3H, OCH2C**H3**), 4.14-4.25 (m, 2H, OC**H2**CH3), 6.32-6.6.38 (d, *J*= 15 Hz, 1H, CH=C**H**-C=O), 6.65-7.69 (m, 18H, Ar-H), 7.71-7.77 (d, *J*= 15 Hz, 1H, C**H**=CH-C=O); 13C NMR (63 MHz, CDCl3, ppm): 14.3 (OCH2**C**H3), 60.3 (O**C**H2CH3), 117.2, 119.2, 122.3, 126.6, 127.5, 128.0, 128.1, 128.3, 128.5, 128.7, 129.0, 130.2, 130.4, 131.1, 132.0, 132.2, 132.6, 134.2, 137.9, 139.9, 147.1, 157.2, 167.5 (O-**C**=O). Anal. Calcd for: C32H26N2O3: C, 78.99; H, 5.39; N, 5.76. Found: C, 78.81; H, 5.20; N, 5.83.

**2.2. (*E*)-Ethyl-3-{5-[4,5-diphenyl-2-(*p*-tolyl)-1*H*-imidazol-1-yl]-2-hydroxyphenyl} acrylate (3b)**

Yellow solid (1.22 g, 98%); m.p. 98 oC; Rf: 0.4 (hexane: EtOAc 13:7 v/v); FT-IR (KBr, ν, cm-1): 3432, 3055, 2957, 2931, 1705, 1625, 1503, 1446, 1290, 1167; 1H NMR (250 MHz, CDCl3, ppm): 0.90-0.95 (t, *J*= 7.5 Hz, 3H, OCH2C**H3**), 2.28 (s, 3H, PhC**H3**), 4.15-4.24 (q, *J*= 7.5 Hz, 2H, OC**H2**CH3), 6.33-6.39 (d, *J*= 15 Hz, 1H, CH=C**H**-C=O), 6.67-6.70 (d, *J*= 7.5 Hz, 1H, Ar-Ha), 6.64-7.55 (m, 16H, Ar-H), 7.72-7.78 (d, 1H, *J*= 15 Hz, C**H**=CH-C=O), 13C NMR (63 MHz, CDCl3, ppm): 13.6 (OCH2CH3), 23.6 (Ph**C**H3), 60.2 (OCH2CH3), 117.5, 118.5, 122.2, 126.6, 127.6, 127.9, 128.1, 128.3, 128.8, 130.6, 131.1, 134.2, 137.8, 138.2, 140.4, 147.3, 153.1,154.7, 158.3, 167.7 (O-**C**=O). Anal. Calcd for: C33H28N2O3: C, 79.18; H, 5.64; N, 5.60. Found: C, 79.11; H, 5.73; N, 5.72.

**2.3. (*E*) -Ethyl 3-{2-hydroxy-5-[2-(4-methoxyphenyl)-4,5-diphenyl-1*H*-imidazol-1-yl]phenyl} acrylate (3c)**

White solid (1.29 g, 100%); m.p. 228 oC; Rf: 0.3 (hexane: EtOAc 13:7 v/v); FT-IR (KBr, ν, cm-1): 3443, 3053, 2958, 2932, 1706, 1630, 1606, 1443, 1289, 1252, 1173, 1113; 1H NMR (250 MHz, CDCl3, ppm): 0.90-0.95 (m, 3H, OCH2C**H3**), 3.77 (s, 3H, PhOC**H3**), 4.17-4.25 (q, *J*= 7.5 Hz, 2H, OC**H2**CH3), 6.32-6.38 (d, *J*= 15 Hz, 1H, CH=C**H**-C=O), 6.68-7.68 (m, 17H, Ar-H, OH), 7.72-7.78 (d, *J*= 15 Hz, 1H, C**H**=CH-C=O); 13C NMR (63 MHz, CDCl3, ppm): 13.5 (OCH2**C**H3), 55.1 (PhO**C**H3), 60.3 (O**C**H2CH3), 113.6, 117.1, 119.2, 122.3, 122.6, 126.6, 127.6, 128.1, 128.3, 128.8, 130.4, 131.1, 134.1, 137.6, 139.9, 147.2, 157.0, 159.7, 167.6 (O-**C**=O). Anal. Calcd for: C33H28N2O4: C, 76.73; H, 5.46; N, 5.42. Found: C, 76.50; H, 5.39; N, 5.50.

**2.4. (*E*)-Ethyl -3-{2-hydroxy-5-[2-(3-nitrophenyl)-4,5-diphenyl-1*H*-imidazol-1-yl] phenyl} acrylate (3d)**

Yellow solid (1.28 g, 96%); m.p. 101 oC; Rf: 0.37 (hexane: EtOAc 13:7 v/v); FT-IR (KBr, ν, cm-1): 3447, 3058, 2980, 2929, 1706, 1630, 1506, 1533, 1439, 1348, 1290, 1165; 1H NMR (250 MHz, CDCl3, ppm): 1.24-1.30 (m, 3H, OCH2C**H3**), 4.14-4.23 (q, *J*= 7.5 Hz, 2H, OC**H2**CH3), 6.34-6.40 (d, *J*= 15 Hz, 1H, CH=C**H**-C=O), 6.81-6.83 (d, *J*= 5 Hz, 1H, Ar-Ha), 7.11-7.69 (m, 13H, Ar-H), 7.73-7.79 (d, 1H, *J*= 15 Hz, C**H**=CH-C=O), 8.01 (s, 1H, Ar-O**H**), 8.06-8.10 (m, 1H, NO2-CH-C-Im-C**Hb**) 8.39-8.40 (m, 1H, NO2-C**Hc**-C-Im); 13C NMR (63 MHz, CDCl3, ppm): 14.3 (OCH2CH3), 60.4 (OCH2CH3), 117.6, 119.3, 122.7, 123.5, 126.9, 127.4, 128.3, 128.6, 128.8, 129.1, 130.0, 130.3, 130.7, 131.0, 132.0, 132.1, 132.3, 133.9, 134.2, 138.6, 139.7, 144.4, 148.0, 158.1, 167.5 (O-**C**=O). Anal. Calcd for: C32H25N3O5: C, 72.31; H, 4.74; N, 7.91. Found: C, 72.41; H, 4.81; N, 5.66.

**2.5. (*E*)-Ethyl-3-{5-[4,5-diphenyl-2-(thiophen-3-yl)-1*H*-imidazol-1-yl]-2-hydroxy phenyl } acrylate (3e)**

Yellow solid (1.14 g, 97%); m.p. 80-82 oC; Rf: 0.37 (hexane: EtOAc 13:7 v/v); FT-IR (KBr, ν, cm-1): 3437, 3059, 2957, 2930, 1705, 1637, 1503, 1446, 1373, 1291, 1167; 1H NMR (250 MHz, CDCl3, ppm): 0.91-0.96 (t, *J*= 7.5 Hz 3H, OCH2C**H3**), 4.17-4.26 (q, *J*= 7.5 Hz, 2H, OC**H2**CH3), 6.43-6.50 (d, *J*= 17.5 Hz, 1H, CH=C**H**-C=O), 6.66-7.54 (m, 16H, Ar-H), 7.80-7.87 (d, 1H, *J*= 17.5 Hz, C**H**=CH-C=O); 13C NMR (63 MHz, CDCl3, ppm): 13.6 (OCH2CH3), 60.3 (OCH2CH3), 117.5, 119.0, 122.6, 124.3, 125.1, 126.7, 127.6, 127.9, 128.1, 128.3, 128.9, 130.2, 130.6, 131.0, 134.0, 137.6, 140.1, 143.7, 158.5, 167.6 (O-**C**=O). Anal. Calcd for: C30H24N2O3S: C, 73.15; H, 4.91; N, 5.69; S, 6.51. Found: C, 73.00; H, 4.89; N, 5.77; S, 6.49.

**2.6. (*E*)-Ethyl-3-{2-hydroxy-5-[2-(4-isopropylphenyl)-4,5-diphenyl-1*H*-imidazol-1-yl] phenyl} acrylate (3f)**

White solid (1.26 g, 95%); decomposition degree 230 oC; Rf: 0.4 (hexane: EtOAc 13:7 v/v); FT-IR (KBr, ν, cm-1): 3443, 3044, 2960, 1708, 1627, 1503, 1433, 1374, 1289, 1160, 1113; 1H NMR (250 MHz, CDCl3, ppm): 1.18-1.20 (d, *J*= 5 Hz, 6H, **H3**CCHC**H3**), 1.26-1.32 (t, *J*= 7.5 Hz, 3H, OCH2C**H3**), 2.81-87 (m, 1H, H**3**CC**H**CH3) 4.16-4.25 (q, *J*= 7.5 Hz, 2H, OC**H2**CH3) , 6.28-6.35 (d, *J*= 17.5 Hz, 1H, CH=C**H**-C=O), 6.61-7.56 (m, 18H, Ar-H), 7.73-7.80 (d, *J*= 17.5 Hz, 1H, C**H**=CH-C=O); 13C NMR (63 MHz, CDCl3, ppm): 14.3 (OCH2**C**H3), 23.7 (PhCH(**C**H3)2), 33.8 (Ph**C**H(CH3)2), 60.3 (O**C**H2CH3), 117.4, 118.9, 122.3, 126.2, 126.6, 127.5, 128.1, 128.3, 128.8, 130.7, 131.1, 134.3, 137.9, 140.0, 142.3, 147.3, 149.1, 157.3, 167.6 (O-**C**=O). Anal. Calcd for: C35H32N2O3: C, 79.52; H, 6.10; N, 5.30. Found: C, 79.47; H, 6.18; N, 5.19.

**2.7. (*E*)-Ethyl -3-{5-[2-(4-chlorophenyl)-4,5-diphenyl-1*H*-imidazol-1-yl]-2-hydroxy phenyl}acrylate (3g)**

White solid (1.18 g, 94%); m.p. 110-112 oC; Rf: 0.4 (hexane: EtOAc 13:7 v/v); FT-IR (KBr, ν, cm-1): 3412, 3056, 2931, 2866, 1703, 1625, 1505, 1446, 1375, 1290, 1163; 1H NMR (250 MHz, CDCl3, ppm): 0.90-0.95 (t, *J*= 7.5 Hz 3H, OCH2C**H3**), 4.16- 4.25 (q, *J*= 7.5 Hz , 2H, OC**H2**CH3), 6.36- 6.42 (d, *J*= 15 Hz, 1H, CH=C**H**-C=O), 6.72-7.56 (m, 17H, Ar-H), 7.73-7.79 (d, *J*= 15 Hz, 1H, C**H**=CH-C=O), 8.02 (s, 1H, Ar-O**H**); 13C NMR (63 MHz, CDCl3, ppm): 13.6 (OCH2**C**H3), 60.3 (O**C**H2CH3), 117.3, 119.0, 122.3, 126.7, 127.4, 127.6, 128.1, 128.4, 128.7, 128.8, 130.1, 130.4, 131.1, 131.5 ,134.1, 134.3, 140.0, 145.9, 158.1, 167.5 (O-**C**=O).Anal. Calcd for: C32H25ClN2O3: C, 73.77; H, 4.84; N, 5.38. Found: C, 73.69; H, 4.58; N, 5.49.

**2.8. (*E*)-Ethyl-3-{5-[4,5-diphenyl-1-(*p*-tolyl)-1*H*-imidazol-2-yl]-2-hydroxyphenyl} acrylate (3h)**

White solid (1.13 g, 90%); m.p. 107 oC; Rf: 0.4 (hexane: EtOAc 13:7 v/v); FT-IR (KBr, ν, cm-1): 3436, 3046, 2938, 2870, 1706, 1619, 1511, 1448, 1382, 1294, 1169; 1H NMR (250 MHz, CDCl3, ppm): 0.89-0.95 (m, 3H, OCH2C**H3**), 2.32 (s, 3H, PhC**H3**), 4.14-4.25 (m, 2H, OC**H2**CH3), 6.05-6.12 (d, *J*= 17.5 Hz, 1H, CH=C**H**-C=O), 6.62-6.66 (d, *J*= 10 Hz, 1H, Ar-Ha), 6.85-7.59 (m, 18H, Ar-**H**), 7.79-7.86 (d, *J*= 17.5 Hz, 1H, C**H**=CH-C=O); 13C NMR (63 MHz, CDCl3, ppm): 14.3 (OCH2**C**H3), 23.7 (Ph**C**H3), 60.0 (O**C**H2CH3), 116.8, 117.9, 120.8, 121.6, 126.6, 127.6, 128.2, 129.2, 129.8, 130.5, 131.1, 131.9, 134.0, 134.3, 137.6, 138.5, 140.3, 147.0, 157.6, 167.6 (O-**C**=O). Anal. Calcd for: C33H28N2O3: C, 79.18; H, 5.64; N, 5.60. Found: C, 79.10; H, 5.74 N, 5.71.

**3. Physical characteristics and spectral data of 4a-h compounds:**

**3.1. (*E*)-Ethyl -3-[2-(2-ethoxy-2-oxoethoxy)-5-(2,4,5-triphenyl-1*H*-imidazol-1-yl)phenyl] acrylate (4a)**

White solid (1.30 g, 98%); m.p. 181oC; Rf: 0.37 (hexane: EtOAc 15:5 v/v); FT-IR (KBr, *ν*, cm-1): 3051, 2980, 1741, 1707, 1631, 1442, 1265, 1239, 1175 ; 1H NMR (250 MHz, CDCl3, ppm): 1.26-1.33 (t, 6H, OCH2C**H3**), 4.08-4.28 (m, 4H, OC**H2**CH3), 4.57 (s, 2H, OC**H2**C=O), 6.35-6.42 (d, *J*= 17.5 Hz, 1H, CH=C**H**-C=O), 6.60-7.68 (m, 18H, Ar-H), 7.73-7.80 (d, *J*= 17.5 Hz, 1H, C**H**=CH-C=O); 13C NMR (63 MHz, CDCl3, ppm): 14.1 (OCH2**C**H3), 14.3 (O**C**H2CH3), 60.4 (OCH2**C**H3), 61.6 (O**C**H2CH3), 65.8 (O**C**H2C=O), 112.4, 121.2, 124.7, 125.3, 126.6, 127.3, 128.2, 128.2, 128.4, 128.5, 128.6, 128.9, 129.2, 130.4, 130.6, 130.9, 131.1, 131.7, 131.9, 132.1, 133.4, 133.9, 134.4, 138.4, 146.9, 155.8, 166.9 (O-C=O), 167.8 (O-C=O). Anal. Calcd for: C36H32N2O5: C, 75.51; H, 5.63; N, 4.89. Found: C, 75.40; H, 5.71; N, 4.96.

**3.2. (*E*)-ethyl -3-{5-[4,5-diphenyl-2-(*p*-tolyl)-1*H*- imidazol -1-yl] -2- [2-ethoxy-2-oxoethoxy] phenyl}acrylate (4b)**

Light yellow (1.27 g, 96%); m.p. 150 oC; Rf: 0.37 (hexane: EtOAc 15:5 v/v); FT-IR (KBr, *ν*, cm-1): 3061, 2979, 2932, 1734, 1698, 1633, 1437, 1282, 1173; 1H NMR (250 MHz, CDCl3, ppm): 1.26- 1.33 (m, 6H, OCH2C**H**3), 2.31 (s, 3H, Ph-C**H3**), 4.19-4.31 (m, 4H, OC**H2**CH3), 4.66 (s, 2H, OC**H2**C=O), 6.35-6.42 (d, *J*= 17.5 Hz, 1H, CH=C**H**-C=O), 6.62-6.65 (d, *J*= 7.5 Hz, 1H, Ha), 6.94-7.61 (m, 15H, Ar-H), 7.75-7.82 (d, *J*= 17.5 Hz, 1H, C**H**=CH-C=O); 13C NMR (63 MHz, CDCl3, ppm): 14.1 (O**C**H2CH3), 14.3 (OCH2**C**H3), 21.2 (Ph-**C**H3) 60.5 (OCH2**C**H3), 61.6 (O**C**H2CH3), 65.9 (OCH2C=O), 112.3, 121.2, 124.7, 126.6, 127.3, 128.1, 128.5, 128.9, 129.2, 130.6, 131.1, 133.9, 134.4, 138.4, 147.1, 155.8, 166.9, (O-C=O), 167.9 (O-C=O). Anal. Calcd for: C37H34N2O5: C, 75.75; H, 5.84; N, 4.77. Found: C, 75.79; H, 5.80; N, 4.89.

**3.3. (*E*)-ethyl-3-{2-[2-ethoxy-2-oxoethoxy]-5-[2-(4-methoxyphenyl)-4,5-diphenyl-1*H*-imidazol-1-yl]phenyl}acrylate (4c)**

White solid (1.36 g, 98%); m.p. 178 oC; Rf: 0.33 (hexane: EtOAc 15:5 v/v); FT-IR (KBr, ν, cm-1): 3042, 2977, 2936, 1740, 1709, 1631, 1444, 1258, 1177; 1H NMR (250 MHz, CDCl3, ppm): 1.26-1.31 (m, 6H, OCH2C**H3**), 3.79 (s, 3H, OC**H3**), 4.20-4.29 (m, 4H, OC**H2**CH3), 4.67 (s, 2H, OC**H2**C=O), 6.37-6.44 (d, *J*= 17.5 Hz, 1H, CH=C**H**-C=O), 6.63-6.66 (d, *J*= 7.5 Hz, 1H, Ha), 6.77-7.60 (m, 16H, Ar-H), 7.75-7.82 (d, *J*= 17.5 Hz, 1H, CH=CH-C=O); 13C NMR (63 MHz, CDCl3, ppm): 14.1 (OCH2**C**H3), 14.3 (OCH2**C**H3), 55.2 (OCH3) , 60.5 (O**C**H2CH3), 61.7 (O**C**H2CH3), 65.8 (O**C**H2C=O), 112.3, 113.7, 121.2, 122.9, 124.7, 126.6, 127.3, 128.1, 128.5, 129.3, 130.3, 130.6, 131.1, 134.4, 138.0, 138.4, 146.9, 155.7, 159.6, 167.0 (O-C=O), 167.9 (O-C=O). Anal. Calcd for: C37H34N2O6: C, 73.74; H, 5.69; N, 4.65. Found: C, 73.80; H, 5.57; N, 4.71.

**3.4. (*E*)-Ethyl -3-{2-[2-ethoxy-2-oxoethoxy]-5-[2-(3-nitrophenyl)-4,5-diphenyl-1*H*-imidazol-1-yl]phenyl}acrylate (4d)**

Yellow solid (1.35 g, 95%); m.p. 140 oC; Rf: 0.4 (hexane: EtOAc 15:5 v/v); FT-IR (KBr, *ν*, cm-1): 3091, 3058, 2981, 2929, 1738, 1701, 1632, 1528, 1502, 1439, 1377, 1266, 1237, 1181; 1H NMR (250 MHz, CDCl3, ppm): 1.21-1.35 (t, 6H, OCH2C**H3**), 4.18-4.31 (m, 4H, OC**H2**CH3), 4.68 (s, 2H, OCH2C=O), 6.41-6.47 (d, *J*= 15 Hz, 1H, CH=C**H**-C=O), 6.70-6.74 (d, *J*= 10 Hz, 1H, Ha) 7.02-8.05 (m, 15H, Ar-H), 7.75-7.81 (d, *J*= 15 Hz, 1H, C**H**=CH-C=O), 8.10-8.13 (m, 1H, Im-C-CH-C-NO2-CH), 8.31-8.33 (m, 1H, NO2-CH-C-Im); 13C NMR (63 MHz, CDCl3, ppm): 14.0 (OCH2**C**H3), 14.2 (O**C**H2CH3), 21.2 (PhCH3) , 60.5 (OCH2**C**H3), 61.7 (O**C**H2CH3), 65.9 (O**C**H2C=O), 112.9, 121.6, 122.8, 123.4, 125.3, 126.9, 127.2, 128.2, 128.4, 128.6, 129.0, 129.3, 129.9, 130.4, 131.0, 133.3, 134.0, 138.0, 138.8, 144.3, 148.1, 156.4, 162.5, 166.8, 167.7 (O-C=O), 167.7 (O-C=O). Anal. Calcd for: C36H31N3O7: C, 70.01; H, 5.06; N, 6.80. Found: C, 69.92; H, 5.15; N, 6.91.

**3.5. (*E*)-Ethyl -3-{5-[4,5-diphenyl-2-(thiophen-3-yl)-1*H*-imidazol-1-yl]-2-[2-ethoxy-2-oxoethoxy]phenyl}acrylate (4e)**

Light yellow (1.28 g, 96%); m.p. 165 oC; Rf: 0.37 (hexane: EtOAc 15:5 v/v); FT-IR (KBr, *ν*, cm-1): 3046, 2974, 2928, 1738, 1701, 1631, 1293, 1233, 1178; 1H NMR (250 MHz, CDCl3, ppm): 1.27-1.34 (m, 6H, OCH2C**H3**), 4.20-4.32 (m, 4H, OC**H2**CH3), 4.70 (s, 2H, OCH2C=O), 6.45-6.51 (d, *J*= 15 Hz, 1H, CH=C**H**-C=O), 6.70-6.74 (d, *J*= 10 Hz, 1H, Ha), 7.04-7.60 (m, 13 H, Ar-H), 7.80-7.86 (d, *J*= 15 Hz, 1H, C**H**=CH-C=O); 13C NMR (63 MHz, CDCl3, ppm): 14.1 (OCH2**C**H3), 14.3 (O**C**H2CH3), 60.5 (OCH2**C**H3), 61.7 (O**C**H2CH3), 65.9 (O**C**H2C=O), 112.5, 121.4, 124.1, 125.0, 125.3, 126.7, 127.3, 127.9, 128.2, 128.5, 129.4, 130.3, 130.8, 131.0, 134.1, 138.2, 156.2, 166.9 (O-C=O), 167.8 (O-C=O). Anal. Calcd for: C34H30N2O5S: C, 70.57; H, 5.23; N, 4.84; S, 5.54. Found: C, 70.61; H, 5.29; N, 4.78; S, 5.63.

**3.6. (*E*)-Ethyl-3-{2-[2-ethoxy-2-oxoethoxy]-5-[2-(4-isopropylphenyl)-4,5-diphenyl-1*H*-imidazol-1-yl]phenyl}acrylate (4f)**

White solid (1.39 g, 98%); m.p. 192 oC; Rf: 0.47 (hexane: EtOAc 15:5 v/v); FT-IR (KBr, *ν*, cm-1): 3058, 2962, 1732, 1632, 1442, 1277, 1243, 1172; 1H NMR (250 MHz, CDCl3, ppm): 1.20-1.23 (d, *J*= 7.5 Hz 6H, **H3**CCHC**H3**), 1.26-1.33 (m, 6H, OCH2C**H3**), 2.81-2.95 (m, 1H, H3CC**H**CH3), 4.21-4.28 (m, 4H, OC**H2**CH3), 4.66 (s, 2H, OC**H2**C=O), 6.32-6.39 (d, *J*= 17.5 Hz, 1H, CH=C**H**-C=O), 6.62-6.66 (d, *J*= 10 Hz, 1H, Ar-**Ha**), 6.95-6.61 (m, 16H, Ar-**H**), 7.76-7.83 (d, *J*= 17.5 Hz, 1H, C**H**=CH-C=O); 13C NMR (63 MHz, CDCl3, ppm): 14.10 (OCH2**C**H3), 14.3 (O**C**H2CH3), 23.7 (PhCH(**C**H3)2), 33.8 (Ph**C**H(CH3)2) , 60.5 (OCH2**C**H3), 61.6 (O**C**H2CH3), 65.9 (O**C**H2C=O), 112.3, 121.1, 124.8, 126.3, 126.6, 127.3, 128.1, 128.5, 128.8, 129.2, 130.6, 131.1, 134.4, 138.4, 147.1, 149.2, 155.7,166.9 (O-C=O), 167.9 (O-C=O). Anal. Calcd for: C39H38N2O5: C, 76.20; H, 6.23; N, 4.56. Found: C, 76.28; H, 6.19; N, 4.49.

**3.7. (*E*)-Ethyl -3-{5-[2-(4-chlorophenyl)-4,5-diphenyl-1*H*-imidazol-1-yl]-2-[2-ethoxy-2-oxoethoxy]phenyl}acrylate (4g)**

White solid (1.36 g, 97%); m.p. 181 oC; Rf: 0.43 (hexane: EtOAc 15:5 v/v); FT-IR (KBr, *ν*, cm-1): 3061, 2977, 2930, 1739, 1708, 1632, 1602, 1442, 1265, 1240, 1176; 1H NMR (250 MHz, CDCl3, ppm): 1.23-1.33 (m, 6H, OCH2C**H3**), 4.16-4.32 (m, 4H, OC**H2**CH3), 4.67 (s, 2H, OCH2C=O), 6.38-6.44 (d, *J*= 15 Hz, 1H, CH=C**H**-C=O), 6.64-6.68 (d, *J*= 10 Hz, 1H, Ph-Ha), 6.92-7.59 (m, 16 H, Ar-H), 7.75-7.81 (d, *J*= 15 Hz, 1H, C**H**=CH-C=O); 13C NMR (63 MHz, CDCl3, ppm): 14.1 (OCH2**C**H3), 14.3 (O**C**H2CH3), 60.5 (OCH2**C**H3), 61.7 (O**C**H2CH3), 65.8 (OCH2C=O), 112.5, 121.4, 125.0, 126.7, 127.3, 128.2, 128.3, 128.5, 129.1, 130.0, 130.4, 130.7, 131.1, 134.4, 138.2, 145.8, 156.0, 166.9 (O-C=O), 167.8 (O-C=O). Anal. Calcd for: C36H31ClN2O5: C, 71.22; H, 5.15; N, 4.61. Found: C, 71.14; H, 5.26; N, 4.73.

**3.8. (*E*)-Ethyl -3-{5-[4,5-diphenyl-1-(*p*-tolyl)-1*H*-imidazol-2-yl]-2-[2-ethoxy-2-oxoethoxy]phenyl}acrylate (4h)**

White solid (1.29 g, 96%); m.p. 140 oC; Rf: 0.43 (hexane: EtOAc 15:5 v/v); FT-IR (KBr, *ν*, cm-1): 3055, 2982, 1758, 1703, 1612, 1440, 1266, 1237, 1181; 1H NMR (250 MHz, CDCl3, ppm): 1.26-1.35 (m, 6H, OCH2C**H3**), 2.35 (s, 3H, PhC**H3**), 4.19-4.31 (m, 4H, OC**H2**CH3), 4.67 (s, 2H, OC**H2**C=O), 6.10-6.17 (d, *J*= 17.5 Hz, 1H, CH=C**H**-C=O), 6.67-6.70 (d, *J*= 7.5 Hz, 1H, Ha), 6.89-7.62 (m, 16H, Ar-H), 7.86-8.93 (d, *J*= 17.5 Hz, 1H, C**H**=CH-C=O); 13C NMR (63 MHz, CDCl3, ppm): 14.1 (OCH2**C**H3), 14.3 (OCH2**C**H3), 21.1 (Ph**C**H3), 60.3 (OCH2**C**H3), 61.5 (O**C**H2CH3), 65.7 (OCH2C=O), 111.8, 119.8, 123.6, 124.2, 126.60, 127.3, 128.2, 129.0, 129.9, 131.1, 131.7, 134.4, 138.7, 139.1, 145.7, 156.2, 167.1 (O-C=O), 168.3 (O-C=O). Anal. Calcd for: C37H34N2O5: C, 75.75; H, 5.84; N, 4.77. Found: C, 75.80; H, 5.79; N, 4.87.

**4. Physical characteristics and spectral data of 5a-h compounds:**

**4.1. Ethyl 3-(2-ethoxy-2-oxoethyl)-5-(2,4,5-triphenyl-1*H*-imidazol-1-yl)-2,3-dihydro benzofuran-2-carboxylate (5a)**

White solid (0.66 g, 78%); m.p. 96 oC; Rf: 0.43 (hexane: EtOAc 14:6 v/v); FT-IR (KBr, *ν*, cm-1): 3059, 2978, 2928, 1735 (C=O), 1603, 1486, 1446, 1377, 1189; 1H NMR (250 MHz, CDCl3, ppm): 1.19-1.33 (m, 6H, OCH2C**H3**), 2.33-2.64 (m, 2H, C**H2**C=O), 3.87-3.95 (m, 1H, C**H**-CH2C=O), 4.02-4.14 (m, 2 H, OC**H2**CH3), 4.17-4.34 (m, 2H, OC**H2**CH3), 4.90-5.92 (d, *J*= 5 Hz, 1H, OC**H**C=O), 6.73-7.62 (m, 18 H, Ar-**H**); 13C NMR (63 MHz, CDCl3, ppm): 14.1 (OCH2**C**H3), 39.1 (CH-**C**H2C=O), 42.4 (**C**H-CH2C=O), 61.0 (O**C**H2CH3), 61.7 (O**C**H2CH3), 84.7 (O**C**HC=O), 110.2, 124.6, 126.5, 127.3, 128.1, 128.3, 128.9, 129.3, 130.8, 131.1, 134.5, 138.1, 142.3, 147.0, 153.4, 158.4, 168.5 (O-**C**=O), 170.4 (O-**C**=O).Anal. Calcd for: C36H32N2O5: C, 75.51; H, 5.63; N, 4.89. Found: C, 75.58; H, 5.57; N, 4.95.

**4.2. Ethyl 5-[4,5-diphenyl-2-(*p*-tolyl)-1*H*-imidazol-1-yl]-3-(2-ethoxy-2-oxoethyl)-2,3-dihydrobenzofuran-2-carboxylate (5b)**

Light yellow (0.67 g, 76%); m.p. 105 oC; Rf: 0.36 (hexane: EtOAc 14:6 v/v); FT-IR (KBr, *ν*, cm-1): 3058, 2978, 2926, 1734 (C=O), 1606, 1486, 1445, 1188; 1H NMR (250 MHz, CDCl3, ppm): 1.18-1.33 (m, 6H, OCH2C**H3**), 2.32 (s, 3H, PhC**H3**), 2.42-2.57 (m, 2H, C**H2**C=O), 3.87-3.95 (m, 1H, C**H**-CH2C=O), 4.08-4.17 (m, 2H, OC**H2**CH3), 4.21-4.35 (m, 2H, OC**H2**CH3), 5.26-5.29 (d, *J*= 7.5 Hz, 1H, OC**H**C=O), 6.44-7.60 (m, 17H, Ar-**H**); 13C NMR (63 MHz, CDCl3, ppm): 14.1 (OCH2**C**H3), 21.2 (Ph**C**H3), 39.2 (CH-**C**H2C=O), 42.4 (**C**H-CH2C=O), 60.9 (O**C**H2CH3), 61.8 (O**C**H2CH3), 84.7 (O**C**HC=O), 110.2, 124.6, 126.5, 127.3, 127.8, 128.1, 128.3, 128.8, 129.4, 130.9, 131.2, 134.5, 138.1, 147.1, 158.3, 169.8 (O-C=O), 170.4 (O-C=O)Anal. Calcd for: C37H34N2O5: C, 75.75; H, 5.84; N, 4.77. Found: C, 75.69; H, 5.75; N, 4.82.

**4.3. Ethyl 3-(2-ethoxy-2-oxoethyl)-5-[2-(4-methoxyphenyl)-4,5-diphenyl-1*H*-imidazol-1-yl]-2,3-dihydrobenzofuran-2-carboxylate (5c)**

Light yellow (0.70 g, 78%); m.p. 110 oC; Rf: 0.28 (hexane: EtOAc 14:6 v/v); FT-IR (KBr, *ν*, cm-1): 3059, 2980, 2934, 1735 (C=O), 1608, 1445, 1296, 1251, 1181; 1H NMR (250 MHz, CDCl3, ppm): 1.19-1.33 (m, 6H, OCH2C**H3**), 2.43-2.58 (m, 2H, C**H2**C=O), 3.79 (s, 3H, OC**H3**), 3.78-3.95 (m, 1H, C**H**-CH2C=O), 4.05-4.16 (m, 2H, OC**H2**CH3), 4.22-4.31 (m, 2H, OC**H2**CH3), 4.90-4.93 (d, 6.5 Hz, 1H, OC**H**C=O), 6.73-7.60 (m, 17 H, Ar-**H**); 13C NMR (63 MHz, CDCl3, ppm): 14.1 (OCH2**C**H3), 39.2 (CH-**C**H2C=O), 42.4 (**C**H-CH2C=O), 55.2 (O**C**H3), 60.9 (O**C**H2CH3), 61.8 (O**C**H2CH3), 84.7 (O**C**HC=O), 110.2 ,113.6 ,123.1 ,124.6 ,126.5 ,127.3 ,127.8 ,128.1 ,128.3 ,128.8 ,129.4 ,130.2, 130.6,,130.9, 131.2, 134.6, 137.9, 146.9, 158.3, 159.6, 169.8 (O-C=O), 170.4 (O-C=O). Anal. Calcd for: C37H34N2O6: C, 73.74; H, 5.69; N, 4.65. Found: C, 73.77; H, 5.71; N, 4.59.

**4.4. Ethyl 3-(2-ethoxy-2-oxoethyl)-5-[2-(3-nitrophenyl)-4,5-diphenyl-1*H*-imidazol-1-yl]-2,3-dihydrobenzofuran-2-carboxylate (5d)**

Yellow solid (0.63 g, 71%); m.p. 65 oC; Rf: 0.32 (hexane: EtOAc 14:6 v/v); FT-IR (KBr, *ν*, cm-1): 3061, 2980, 2929, 1733 (C=O), 1606, 1445, 1193; 1H NMR (250 MHz, CDCl3, ppm): 1.26-1.34 (m, 6H, OCH2C**H3**), 2.52-2.65 (m, 2H, C**H2**C=O), 3.91-3.99 (m, 1H, C**H**-CH2C=O), 4.08-4.16 (m, 2H, OC**H2**CH3), 4.21-4.35 (m, 2 H, OC**H2**CH3), 4.92-4.95 (d, *J* = 7.5 Hz, 1H, OCHC=O), 6.78-8.12 (m, 17H, Ar-**H**); 13C NMR (63 MHz, CDCl3, ppm): 14.1 (OCH2**C**H3), 39.3 (CH-**C**H2C=O), 42.3 (**C**H-CH2C=O), 61.0 (O**C**H2CH3), 61.9 (O**C**H2CH3), 84.9 (O**C**HC=O), 110.7, 122.6, 124.7 ,126.9, 127.2, 128.2, 128.5, 129.1, 129.3, 130.1, 131.1, 132.2, 134.2, 144.3, 148.1, 159.0, 169.7 (O-**C**=O), 170.4 (O-**C**=O). Anal. Calcd for: C36H31N3O7: C, 70.01; H, 5.06; N, 6.80. Found: C, 69.96; H, 5.12; N, 6.86.

**4.5. Ethyl 5-[4,5-diphenyl-2-(thiophen-3-yl)-1*H*-imidazol-1-yl]-3-(2-ethoxy-2-oxoethyl)-2,3-dihydrobenzofuran-2-carboxylate (5e)**

Light yellow (0.69 g, 79%); m.p. 158 oC; Rf: 0.39 (hexane: EtOAc 14:6 v/v); FT-IR (KBr, *ν*, cm-1): 3059, 2976, 2928, 1734 (C=O), 1604, 1444, 1272, 1186; 1H NMR (250 MHz, CDCl3, ppm): 1.19-1.34 (m, 6H, OCH2C**H3**), 2.52-2.62 (m, 2H, C**H2**C=O), 3.92-4.00 (m, 1H, C**H**-CH2C=O), 4.06-4.14 (m, 2 H, OC**H2**CH3), 4.23-4.33 (m, 2H, OC**H2**CH3), 4.95-4.97 (d, *J*= 7.5 Hz, 1H, OC**H**C=O), 6.82-7.60 (m, 16H, Ar-**H**); 13C NMR (63 MHz, CDCl3, ppm): 14.1 (OCH2**C**H3), 39.1 (CH-**C**H2C=O), 42.4 (**C**H-CH2C=O), 61.0 (O**C**H2CH3), 61.9 (O**C**H2CH3), 84.8 (O**C**HC=O), 110.4, 123.8, 124.8, 124.9, 126.6, 127.3, 127.9, 128.1, 128.3, 129.1, 129.6, 130.6, 131.1, 131.6, 134.4, 137.9, 158.9, 169.8 (O-**C**=O), 170.4 (O-**C**=O). Anal. Calcd for: C34H30N2O5S: C, 70.57; H, 5.23; N, 4.84; S, 5.54. Found: C, 70.63; H, 5.31; N, 4.91; S, 5.42.

**4.6. Ethyl 3-(2-ethoxy-2-oxoethyl)-5-[2-(4-isopropylphenyl)-4,5-diphenyl-1H-imidazol-1-yl]-2,3-dihydrobenzofuran-2-carboxylate (5f)**

White solid (0.72 g, 79%); m.p. 167 oC; Rf: 0.46 (hexane: EtOAc 14:6 v/v); FT-IR (KBr, *ν*, cm-1) 3059, 2966, 1739, 1607, 1487, 1377, 1194; 1H NMR (250 MHz, CDCl3, ppm): 1.21-1.33 (m, 12 H, C**H3**CHC**H3**, OCH2C**H3**), 2.25-2.62 (m, 2H, C**H2**C=O), 2.82-2.95 (m, 1H, CH3C**H**CH3), 3.90-2.95 (m, 1H, C**H**-CH2C=O), 4.05-4.14 (m, 2 H, OC**H2**CH3), 4.20-4.32 (m, 2H, OC**H2**CH3), 4.90-4.93 (d, *J* = 7.5 Hz, 1H, OC**H**C=O), 6.74-7.61 (m, 17H, Ar-**H**); 13C NMR (63 MHz, CDCl3, ppm): 14.1 (OCH2**C**H3), 23.7, 23.8 (**C**H3CH**C**H3), 33.8 (CH3**C**HCH3), 39.2 (CH-**C**H2C=O), 42.4 (O-CH-**C**H-CH2C=O), 60.9 (O**C**H2CH3), 61.8 (O**C**H2CH3), 84.7 (O**C**HC=O), 110.2, 124.6, 124.7, 126.2, 126.5, 127.3, 127.8, 128.1, 128.3, 128.8, 129.2, 129.4, 130.9, 131.2, 134.6, 138.0, 147.1 , 149.0, 158.3, 169.8 (O-**C**=O), 170.4 (O-**C**=O). Anal. Calcd for: C39H38N2O5: C, 76.20; H, 6.23; N, 4.56. Found: C, 76.27; H, 6.18; N, 4.62.

**4.7. Ethyl 5-[2-(4-chlorophenyl)-4,5-diphenyl-1*H*-imidazol-1-yl]-3-(2-ethoxy-2-oxoethyl )-2,3-dihydrobenzofuran-2-carboxylate (5g)**

Light yellow (0.65 g, 74%); m.p. 140 oC; Rf: 0.46 (hexane: EtOAc 14:6 v/v); FT-IR (KBr, *ν*, cm-1): 3059, 2979, 2935, 1733 (C=O), 1608, 1487, 1444, 1253, 1179; 1H NMR (250 MHz, CDCl3, ppm): 1.20-1.34 (m, 6H, OCH2C**H3**), 2.47-2.60 (m, 2H, C**H2**C=O), 3.91-3.93 (m, 1H, C**H**-CH2C=O), 4.08-4.11 (m, 2 H, OC**H2**CH3), 4.23-4.32, (m, 2H, OC**H2**CH3) 4.92-4.94 (d, *J*= 5 Hz, 1H, OC**H**C=O), 6.75-7.90 (m, 17H, Ar-**H**); 13C NMR (63 MHz, CDCl3, ppm): 14.1 (OCH2**C**H3), 39.1 (CH-**C**H2C=O), 42.3 (**C**H-CH2C=O), 61.0 (O**C**H2CH3), 61.9 (O**C**H2CH3), 84.7 (O**C**HC=O), 110.4, 124.6, 126.7, 127.3, 128.0, 128.2, 129.0, 129.3, 130.0, 130.5, 131.1, 134.3, 138.3, 145.8, 158.6, 169.7 (O-**C**=O), 170.4 (O-**C**=O).Anal. Calcd for: C36H31ClN2O5: C, 71.22; H, 5.15; N, 4.61. Found: C, 71.30; H, 5.08; N, 4.72.

**4.8.** **Ethyl 5-[4,5-diphenyl-1-(*p*-tolyl)-1*H*-imidazol-2-yl]-3-(2-ethoxy-2-oxoethyl)-2,3-dihydrobenzofuran-2-carboxylate (5h)**

white solid (0.60 g, 68%); m.p. 102 oC; Rf: 0.5 (hexane: EtOAc 14:6 v/v); FT-IR (KBr, *ν*, cm-1): 3057, 2980, 2928, 1735 (C=O), 1607, 1512, 1476, 1447, 1376, 1190; 1H NMR (250 MHz, CDCl3, ppm): 1.24-1.34 (m, 6H, OCH2C**H3**), 2.32 (s, 3H, PhC**H3**), 2.54-2.68 (m, 2H, C**H2**C=O), 3.92-4.00 (m, 1H, C**H**-CH2C=O), 4.11-4.31 (m, 4H, OC**H2**CH3), 4.94-4.96 (d, *J*= 5 Hz, 1H, OC**H**C=O), 6.67-7.60 (m, 17H, Ar-**H**); 13C NMR (63 MHz, CDCl3, ppm): 14.1 (OCH2**C**H3), 20.2 (Ph**C**H3), 34.6 (CH-**C**H2C=O), 41.7 (**C**H-CH2C=O), 60.0 (O**C**H2CH3), 60.6 (O**C**H2CH3), 83.7 (O**C**HC=O), 108.5, 123.2, 124.2, 125.6, 126.4, 126.8, 126.9, 127.0, 127.2, 127.4, 128.8, 129.0, 129.2, 129.6, 129.7, 130.2, 133.2, 137.2, 145.9, 169.9 (O-C=O), 170.1 (O-C=O) Anal. Calcd for: C37H34N2O5: C, 75.75; H, 5.84; N, 4.77. Found: C, 75.68; H, 5.77; N, 4.83.

**5. Physical characteristics and spectral data of 6a-h compounds:**

**5.1.** **Ethyl 3-(2-ethoxy-2-oxoethyl)-5-(2,4,5-triphenyl-1*H*-imidazol-1-yl)benzofuran-2-carboxylate (6a)**

Light brown oily (0.25 g, 43%); Rf: 0.41 (hexane: EtOAc 14:6 v/v); FT-IR (KBr, *ν*, cm-1): 3062, 2922, 2855, 1737 (C=O), 1671, 1619, 1483, 1373, 1303, 1182 ; 1H NMR (250 MHz, DMSO-d6, ppm): 1.06-1.13 (m, 3H, OCH2C**H3**), 1.15-1.21 (m, 3H, OCH2C**H3**), 3.89 (s, 2H, C**H2**C=O), 3.93-4.04 (m, 2 H, OC**H2**CH3), 4.11-4.19 (m, 2H, OC**H2**CH3), 6.86-8.13 (m, 18 H, Ar-**H**); 13C NMR (63 MHz, DMSO-d6, ppm): 13.3 (OCH2**C**H3), 13.4 (OCH2**C**H3), 37.5 (**C**H2C=O), 59.7 (O**C**H2CH3), 60.7 (O**C**H2CH3), 109.3 ,112.1 ,113.0 ,113.8 ,115.3 ,116.0 ,119.1 ,120.1 ,121.3 ,123.6, 123.9, 125.2, 126.4, 126.7, 127.3, 127.8, 128.9, 130.7, 132.9, 139.7, 157.8, 159.6 (O-C=O), 170.1 (O-C=O). Anal. Calcd for: C36H30N2O5: C, 75.77; H, 5.30; N, 4.91. Found: C, 75.69; H, 5.34; N, 4.83.

**5.2. Ethyl 5-[4,5-diphenyl-2-(*p*-tolyl)-1*H*-imidazol-1-yl]-3-(2-ethoxy-2-oxoethyl) benzofuran-2-carboxylate (6b)**

Light brown oily (0.15 g, 25%); Rf: 0.34 (hexane: EtOAc 14:6 v/v); FT-IR (KBr, *ν*, cm-1): 3060, 2920, 2853, 1735 (C=O), 1669, 1614, 1477, 1372, 1301, 1184; 1H NMR (250 MHz, CDCl3, ppm): 1.17-1.34 (m, 6H, OCH2C**H3**), 2.39 (s, 3H, Ph-C**H3**), 3.75 (s, 2H, C**H2**C=O), 4.06-4.18 (m, 2 H, OC**H2**CH3), 4.24-4.30 (m, 2H, OC**H2**CH3), 6.86-7.82 (m, 17 H, Ar-**H**); 13C NMR (63 MHz, CDCl3, ppm): 14.1 (OCH2**C**H3), 21.6 (Ph-**C**H3), 42.6 (**C**H2C=O), 60.8 (O**C**H2CH3), 61.6 (O**C**H2CH3), 109.7, 110.5, 117.0, 121.2, 126.0, 127.2, 128.4, 128.6, 128.8, 129.3, 129.3, 130.1, 131.0, 132.4, 141.4, 132.4, 143.6, 156.2 (O-C=O), 170.0 (O-C=O).Anal. Calcd for: C37H32N2O5: C, 76.01; H, 5.52; N, 4.79. Found: C, 76.08; H, 5.60; N, 4.68.

**5.3. Ethyl 3-(2-ethoxy-2-oxoethyl)-5-(2-(4-methoxyphenyl)-4,5-diphenyl-1*H*-imidazol-1-yl)benzofuran-2-carboxylate (6c)**

Light brown oily (0.24 g, 40%); Rf: 0.25 (hexane: EtOAc 14:6 v/v); FT-IR (KBr, *ν*, cm-1); 3062, 2968, 2925, 1735 (C=O), 1670, 1608, 1484, 1452, 1374, 1307, 1254, 1175; 1H NMR (250 MHz, CDCl3, ppm): 1.18-1.32 (m, 6H, OCH2CH3), 3.78 (s, 2H, CH2C=O), 3.81 (s, 3H, OCH3), 4.04-4.15 (m, 2 H, OCH2CH3), 4.20-4.30 (m, 2H, OCH2CH3), 6.47-7.81 (m, 17 H, Ar-H); 13C NMR (63 MHz, CDCl3, ppm): 14.1 (OCH2CH3), 41.0 (**C**H2C=O), 55.4 (OCH3), 60.8 (OCH2CH3), 61.6 (OCH2CH3), 109.6 , 113.4, 113.7, 116.9 ,121.3 ,124.4 ,125.9 ,127.2 ,127.7 ,128.4 ,128.8, 130.6, 131.0, 131.3, 132.4, 134.4, 135.3, 136.5, 138.5, 140.2, 143.8, 163.4 (O-C=O), 178.7 (O-C=O). Anal. Calcd for: C37H32N2O6: C, 73.99; H, 5.37; N, 4.66. Found: C, 74.05; H, 5.32; N, 4.72.

**5.4. Ethyl 3-(2-ethoxy-2-oxoethyl)-5-[2-(3-nitrophenyl)-4,5-diphenyl-1*H*-imidazol-1-yl]benzofuran-2-carboxylate (6d)**

brown oily (0.24 g, 39%); Rf: 0.30 (hexane: EtOAc 14:6 v/v); FT-IR (KBr, *ν*, cm-1): 3073, 2983, 1719 (C=O), 1676, 1616, 1532, 1485, 1350, 1295, 1186 ; 1H NMR (250 MHz, DMSO-d6, ppm): 1.06-1.11 (m, 3H, OCH2C**H3**), 1.16-1.21 (m, 3H, OCH2C**H3**), 3.85 (s, 2H, C**H2**C=O), 3.92-3.99 (m, 2 H, OC**H2**CH3), 4.10-4.19 (m, 2H, OC**H2**CH3), 6.73-8.35 (m, 17 H, Ar-**H**); 13C NMR (63 MHz, DMSO-d6, ppm): 13.3 (OCH2**C**H3), 13.4 (OCH2**C**H3), 41.2 (**C**H2C=O), 59.7 (O**C**H2CH3), 60.7 (O**C**H2CH3), 109.5, 123.1 123.8, 124.1, 125.3, 126.2, 127.4, 128.1, 128.2, 129.2, 129.6, 129.7, 132.3, 138.2, 139.1, 139.4, 146.8, 158.2 (O-C=O), 170.0 (O-C=O).Anal. Calcd for: C36H29N3O7: C, 70.23; H, 4.75; N, 6.83. Found: C, 70.31; H, 4.82; N, 6.76.

**5.5. Ethyl 3-(2-ethoxy-2-oxoethyl)-5-[2-(4-isopropylphenyl)-4,5-diphenyl-1*H*-imidazol-1-yl]benzofuran-2-carboxylate (6f)**

Light brown oily (0.23 g, 37%); Rf: 0.43 (hexane: EtOAc 14:6 v/v); FT-IR (KBr, *ν*, cm-1); 3062, 2961, 2924, 1737 (C=O), 1671, 1616, 1486, 1486, 1373, 1303, 1303, 1190; 1H NMR (400 MHz, CDCl3, ppm): 1.25-1.28 (m, 6H, PhCH(C**H3**)2), 1.29-1.32 (m, 3H, OCH2C**H3**) 1.33-1.37 (m, 3H, OCH2C**H3**), 2.90-2.96 (m, 1H, PhC**H**(CH3)2), 3.95 (s, 2H, C**H2**C=O), 4.11-4.19 (m, 2 H, OC**H2**CH3), 4.25-4.36 (m, 2H, OC**H2**CH3), 6.23-8.04 (m, 17 H, Ar-H); 13C NMR (100 MHz, CDCl3, ppm): 14.2 (OCH2**C**H3), 14.3 (OCH2**C**H3), 23.7 (PhCH(**C**H3)2, 23.8 (PhCH(**C**H3)2, 33.9 (Ph**C**H(CH3)2), 42.4 (**C**H2C=O), 61.0 (OCH2CH3), 61.9 (OCH2CH3), 110.3 , 112.4, 121.3 , 122.0, 123.7, 124.6 ,126.5 ,126.6 ,127.1 ,128.0 ,128.1, 128.3, 128.5, 128.7, 128.8, 128.9, 129.0, 129.3, 129.4, 130.2, 130.6, 131.1, 132.2, 133.2, 158.6 (O-C=O), 170.5 (O-C=O). Anal. Calcd for: C39H36N2O5: C, 76.45; H, 5.92; N, 4.57. Found: C, 76.51; H, 5.87; N, 4.63.

**5.6.** **Ethyl 5-[2-(4-chlorophenyl)-4,5-diphenyl-1*H*-imidazol-1-yl]-3-(2-ethoxy-2-oxoethyl)benzofuran-2-carboxylate (6g)**

Light brown oily (0.20 g, 34%); Rf: 0.25 (hexane: EtOAc 14:6 v/v); FT-IR (KBr, *ν*, cm-1): 3064, 2980, 2931, 1735 (C=O), 1672, 1594, 1484, 1373, 1299, 1174 ; 1H NMR (250 MHz, DMSO-d6, ppm): 1.07-1.13 (m, 3H, OCH2C**H3**), 1.14-1.23 (m, 3H, OCH2C**H3**), 3.87 (s, 2H, C**H2**C=O), 3.93-4.04 (m, 2 H, OC**H2**CH3), 4.20-4.23 (m, 2H, OC**H2**CH3), 6.92-7.93 (m, 17 H, Ar-**H**); 13C NMR (63 MHz, DMSO-d6, ppm): 13.4 (OCH2**C**H3), 41.2 (**C**H2C=O), 59.8 (O**C**H2CH3), 60.7 (O**C**H2CH3), 109.4 ,114.7, 116.6, 123.9, 126.4, 127.1, 127.3, 128.0, 128.1, 129.0, 130.1, 131.0, 132.8, 135.0, 135.5, 135.6, 137.8, 139.6, 142.2, 155.6, 157.9, 158.8 (O-C=O), 170.1 (O-C=O).Anal. Calcd for: C36H29ClN2O5: C, 71.46; H, 4.83; N, 4.63. Found: C, 71.52; H, 4.90; N, 4.56.

**5.7. Ethyl 5-[4,5-diphenyl-1-(*p*-tolyl)-1*H*-imidazol-2-yl]-3-(2-ethoxy-2-oxoethyl) benzofuran-2-carboxylate (6h)**

Light brown oily (0.23 g, 39%); Rf: 0.46 (hexane: EtOAc 14:6 v/v); FT-IR (KBr, *ν*, cm-1): 3061, 2979, 2928, 1737 (C=O), 1665, 1611, 1487, 1446, 1373, 1249, 1196; 1H NMR (250 MHz, DMSO-d6, ppm): 1.11-1.25 (m, 6H, OCH2C**H3**), 2.31 (s, 3H, Ph-C**H3**), 3.89 (s, 2H, C**H2**C=O), 3.99-4.24 (m, 4H, OC**H2**CH3), 6.70-7.81 (m, 17 H, Ar-**H**); 13C NMR (63 MHz, DMSO-d6, ppm): 13.3 (OCH2**C**H3), 13.4 (OCH2**C**H3), 20.1 (Ph-**C**H3), 34.3 (**C**H2C=O), 59.8 (O**C**H2CH3), 60.8 (O**C**H2CH3), 108.6, 119.0, 121.3, 125.1, 125.5, 126.3, 126.4, 127.0, 127.3, 127.8, 128.2, 128.4, 128.9, 129.0, 129.3, 129.7, 129.9, 130.5, 131.0, 132.1, 132.5, 137.6, 137.7, 139.9, 145.7, 159.0 (O-C=O), 170.2 (O-C=O).Anal. Calcd for: C37H32N2O5: C, 76.01; H, 5.52; N, 4.79. Found: C, 76.07; H, 5.59; N, 4.69.

**Ethyl 5-(2,4,5-triphenyl-1*H*-imidazol-1-yl)benzofuran-2-carboxylate (2a):**

**
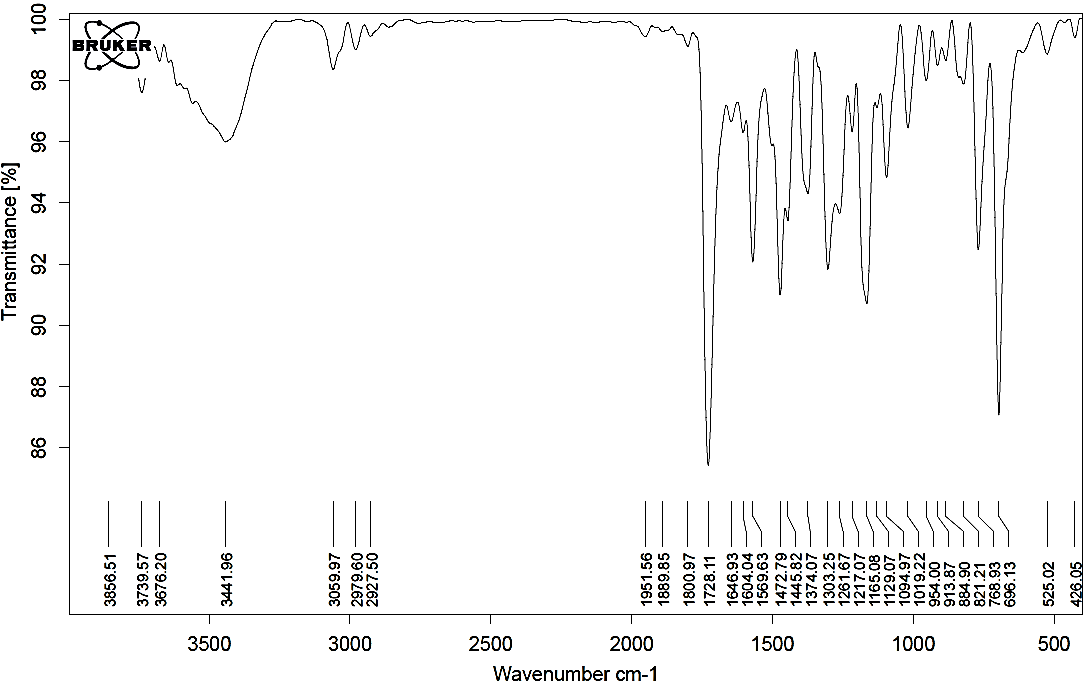
Figure 1**. FT-IR spectrum of compound **2a.**

**
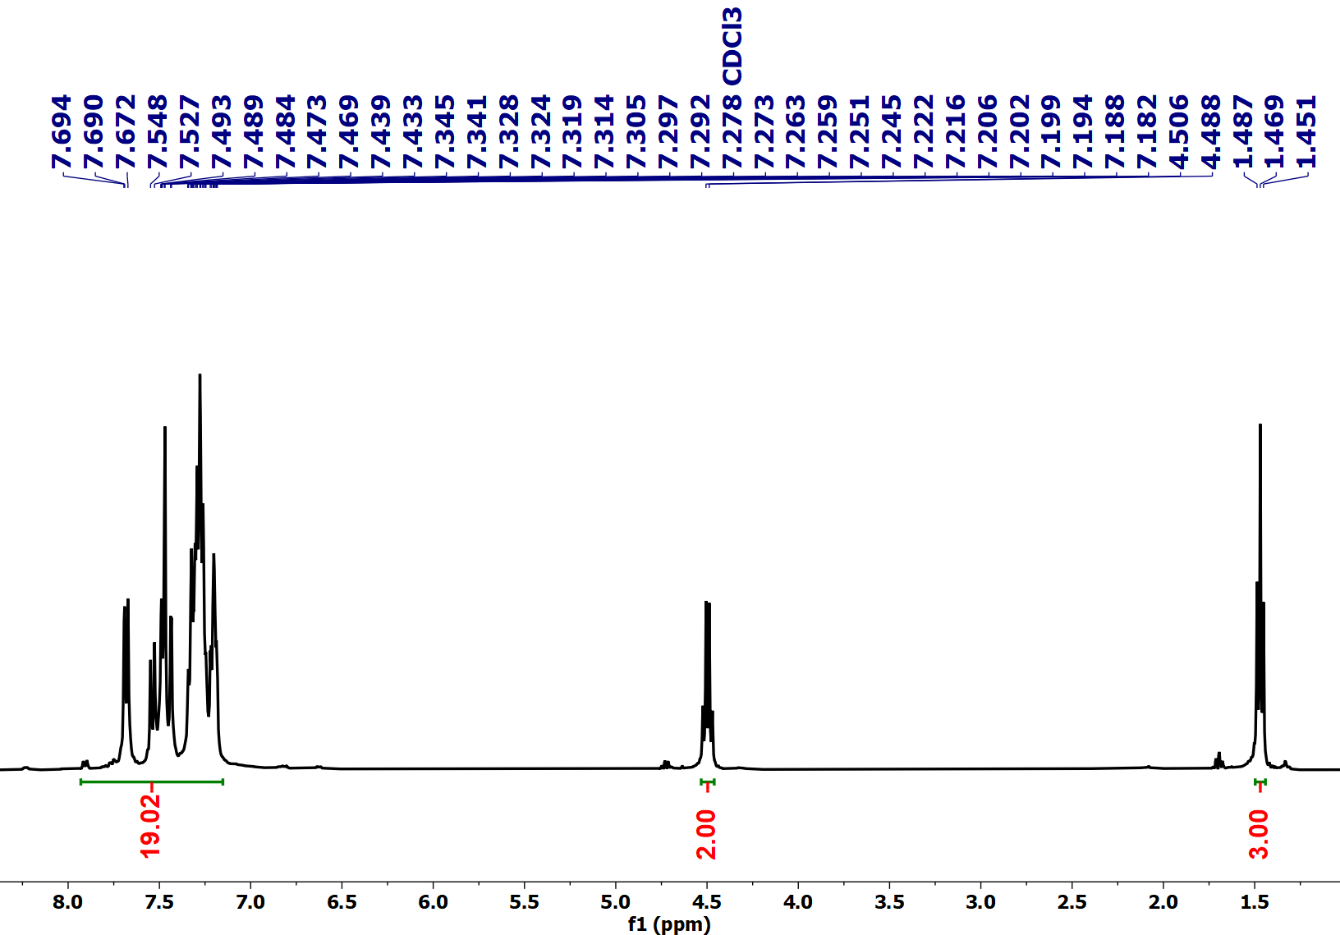
Figure 2.** 1H NMR spectrum (400 MHz) of compound **2a** in CDCl3.

**
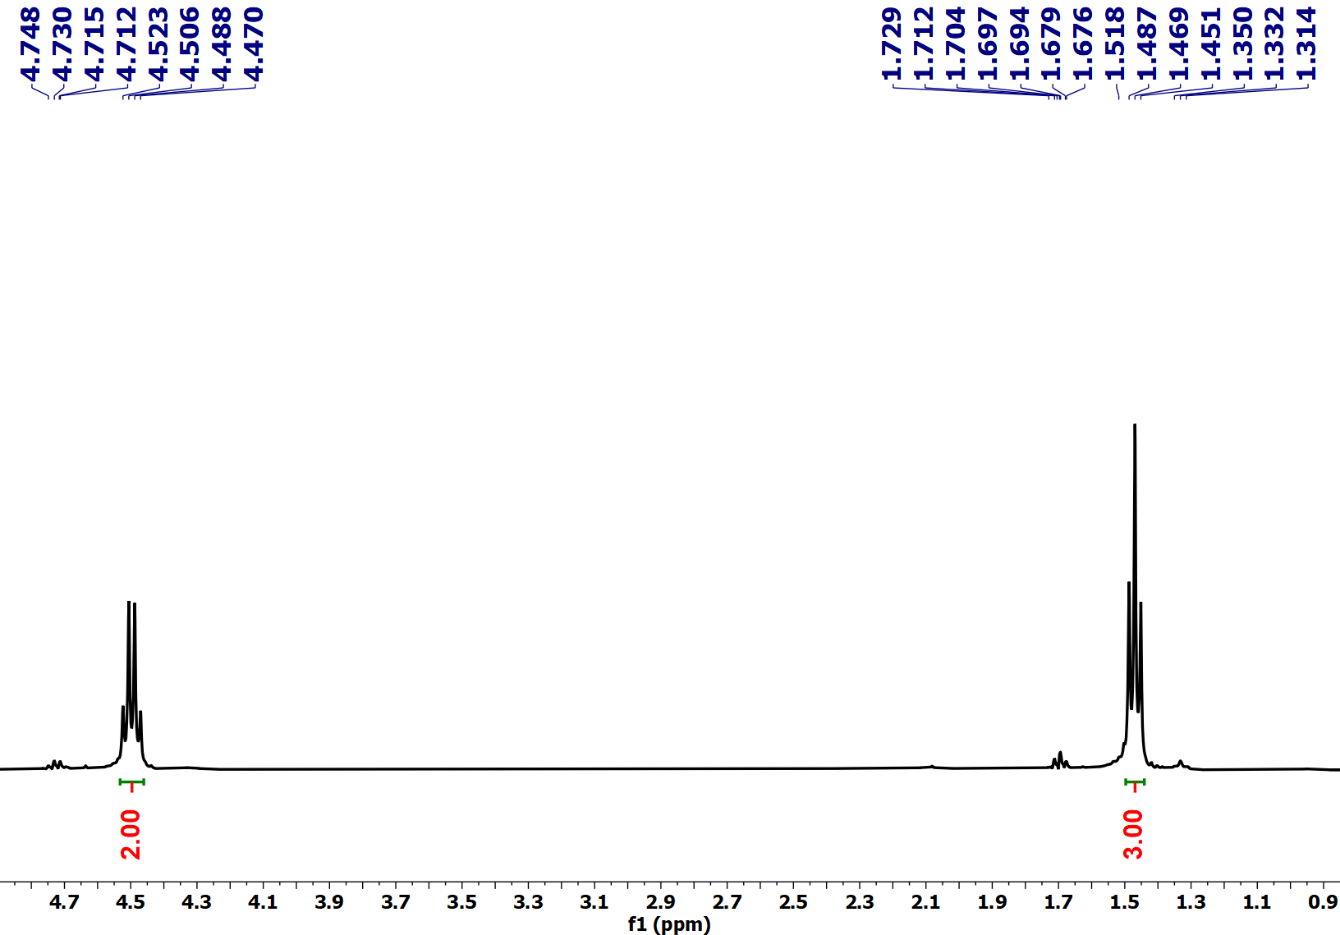
Figure 3.** Expanded (1) 1H NMR spectrum (400 MHz) of compound **2a** in CDCl3.

**
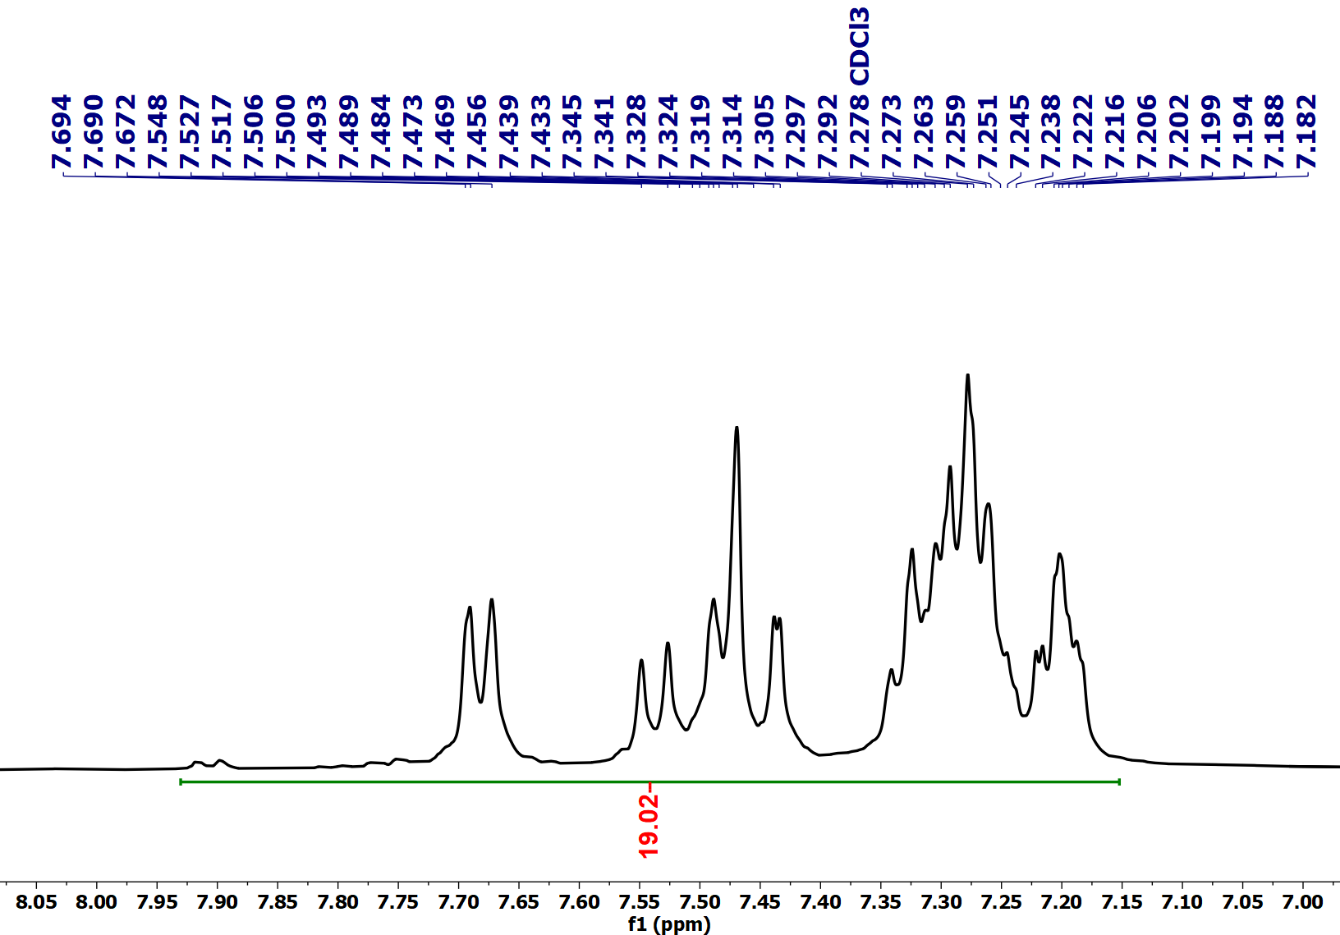
Figure 4.** Expanded (2) 1H NMR spectrum (400 MHz) of compound **2a** in CDCl3.

**
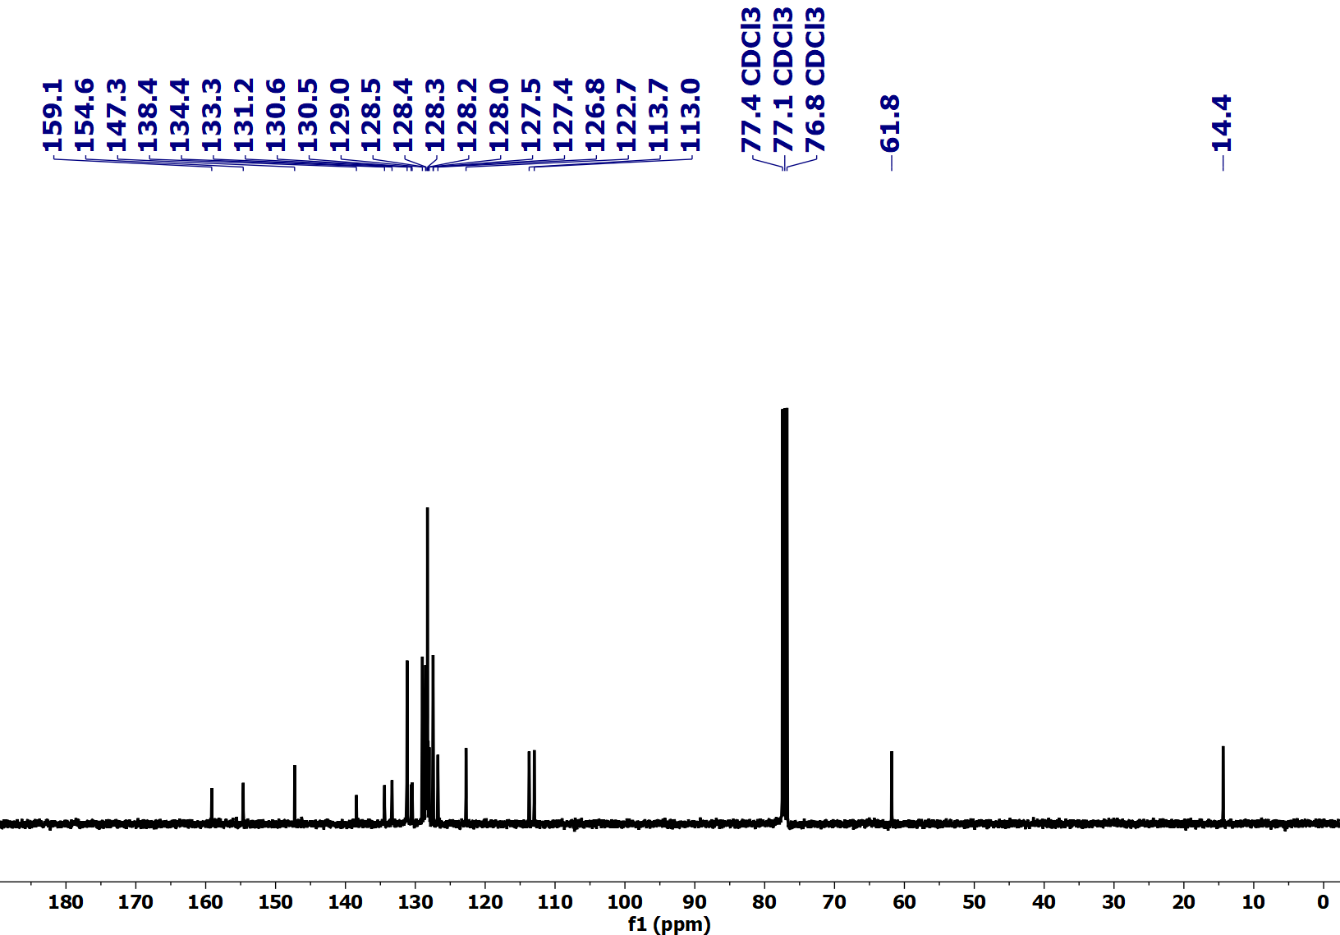
Figure 5.** 13C NMR spectrum (100 MHz) of compound **2a** in CDCl3.

**Ethyl 5-[4,5-diphenyl-2-(*p*-tolyl)-1*H*-imidazol-1-yl]benzofuran-2-carboxylate (2b)**

**
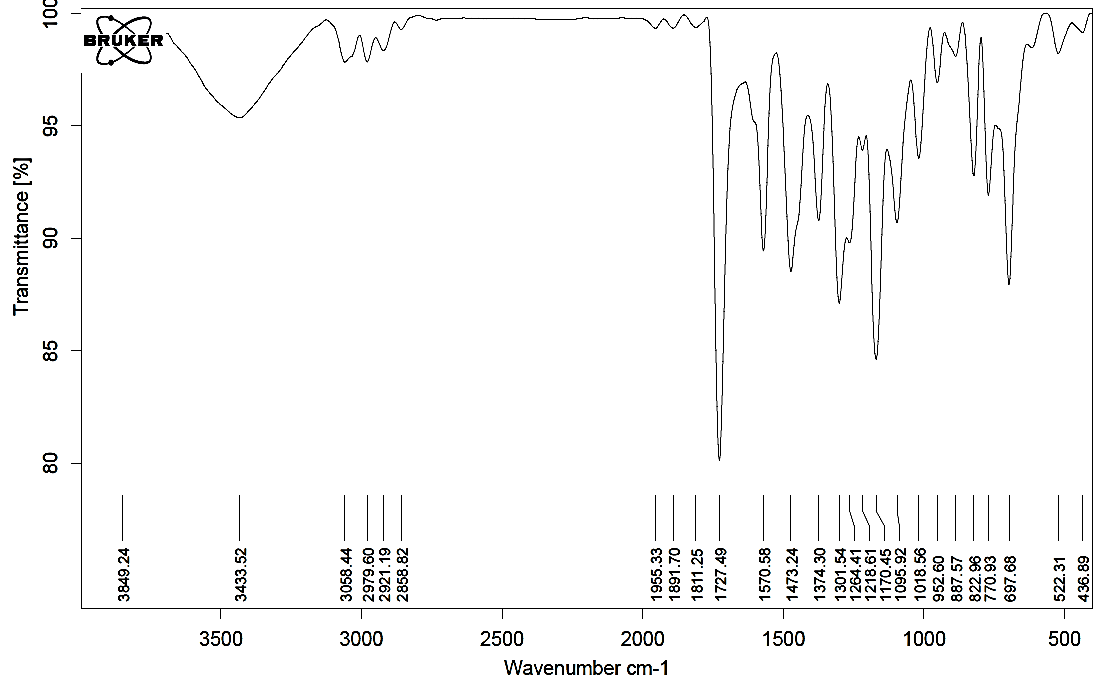
**

**Figure 6**. FT-IR spectrum of compound **2b.**

**
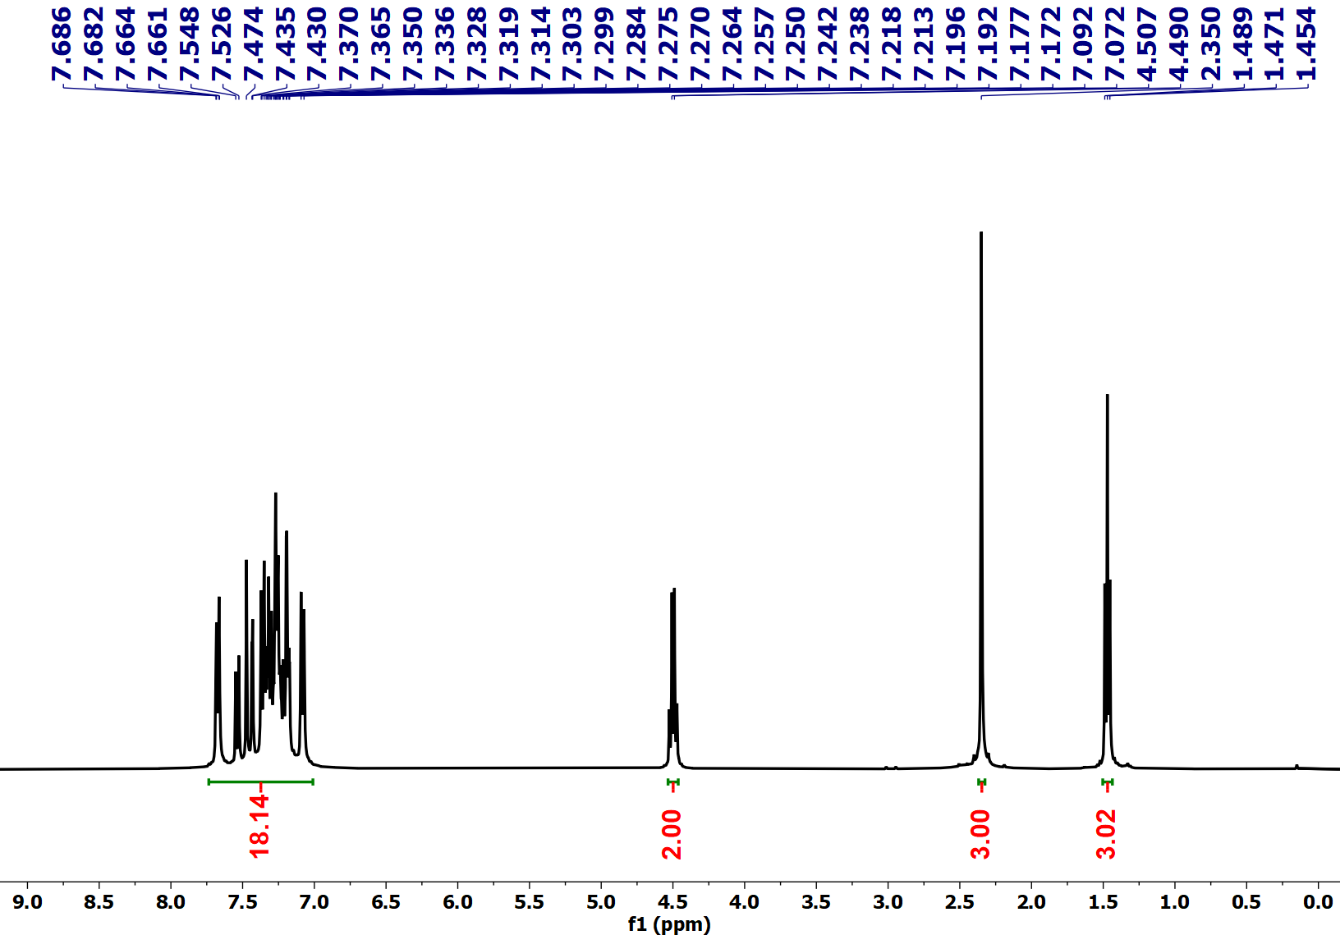
**

**Figure 7.** 1H NMR spectrum (400 MHz) of compound **2b** in CDCl3.

**
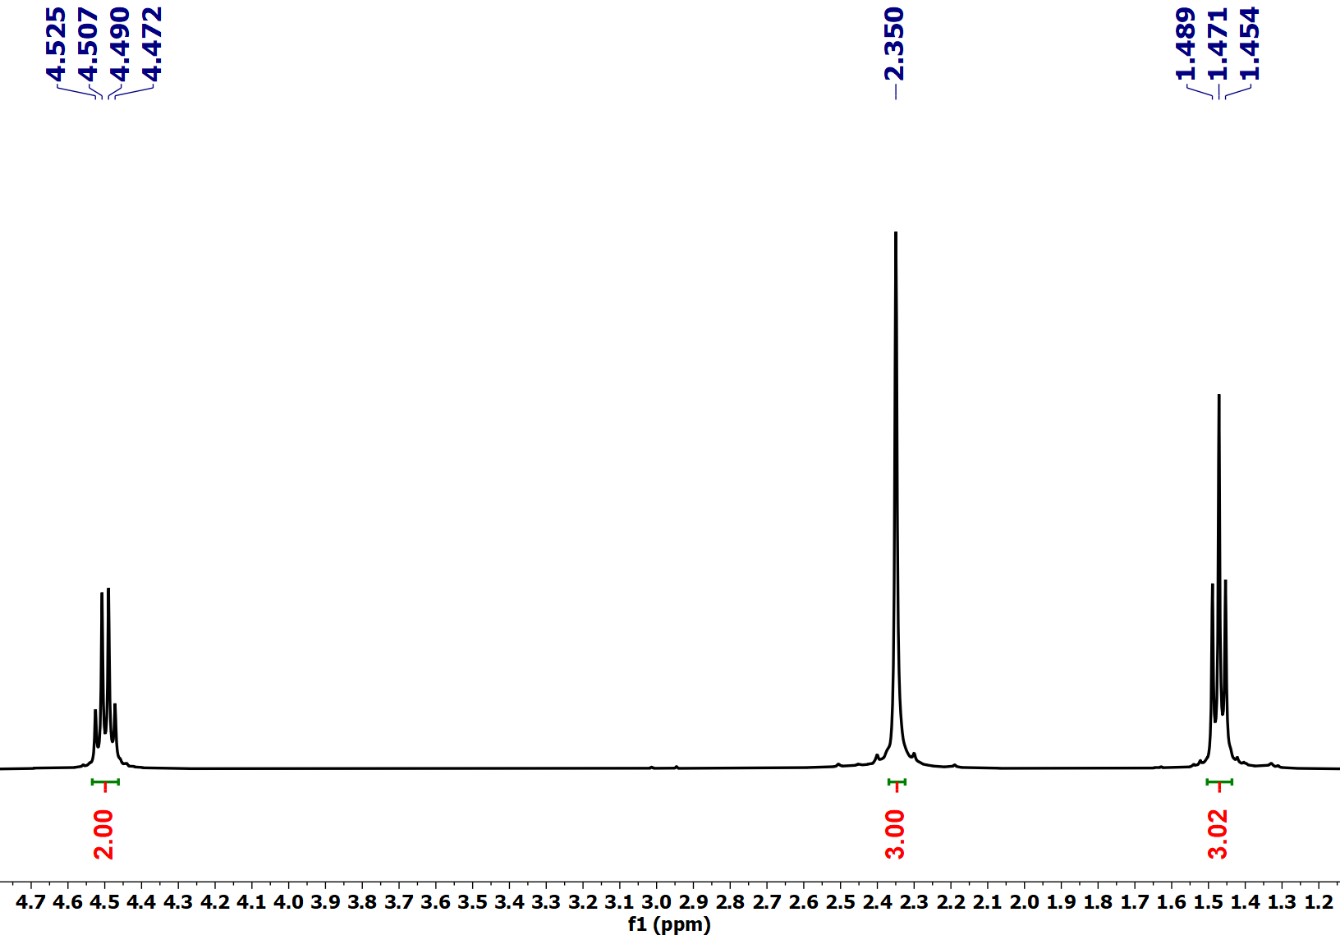
**

**Figure 8.** Expanded (1) 1H NMR spectrum (400 MHz) of compound **2b** in CDCl3.

**
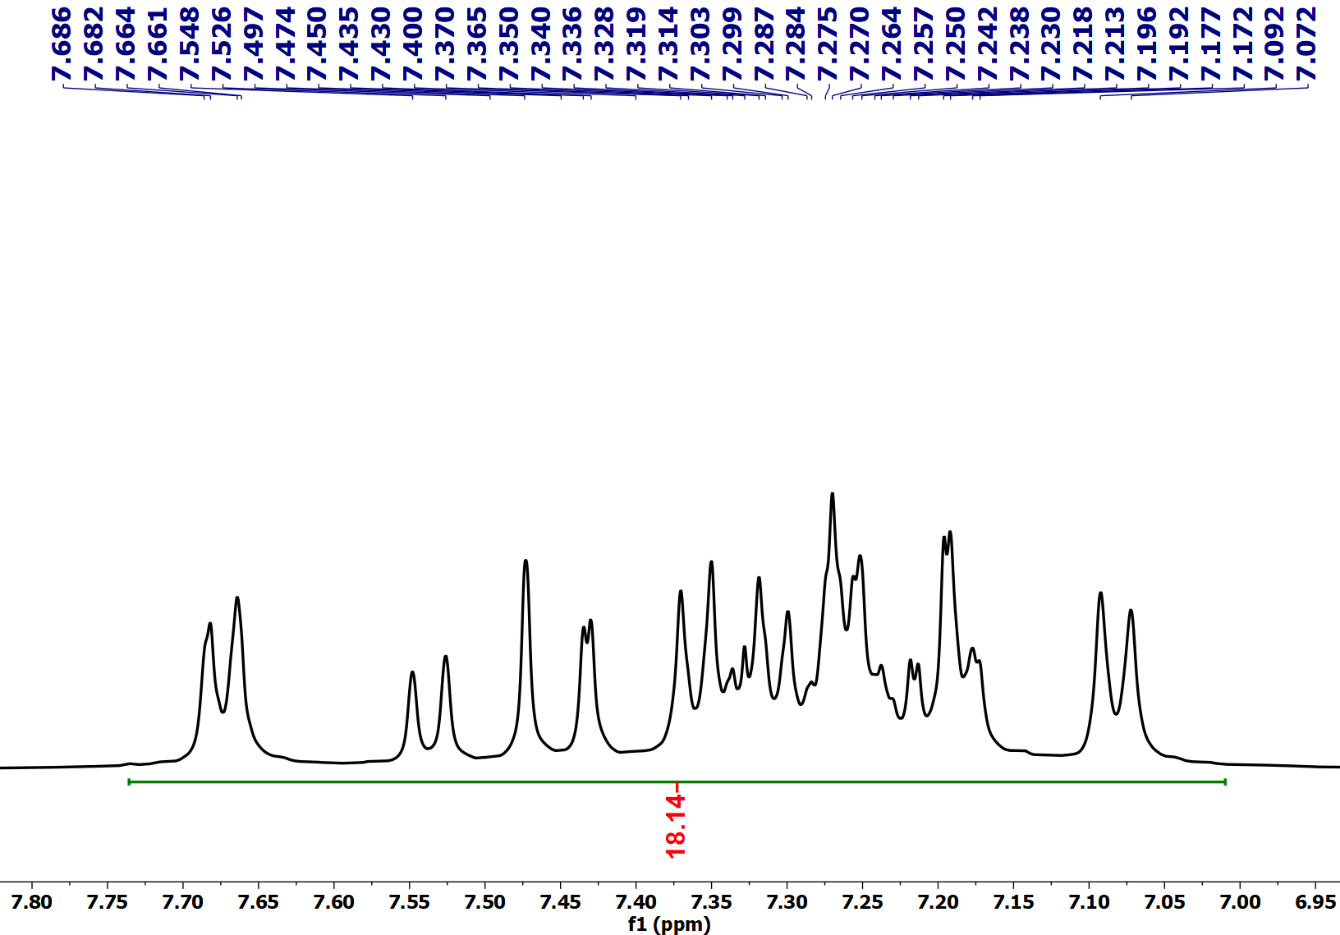
**

**Figure 9.** Expanded (2) 1H NMR spectrum (400 MHz) of compound **2b** in CDCl3.

**
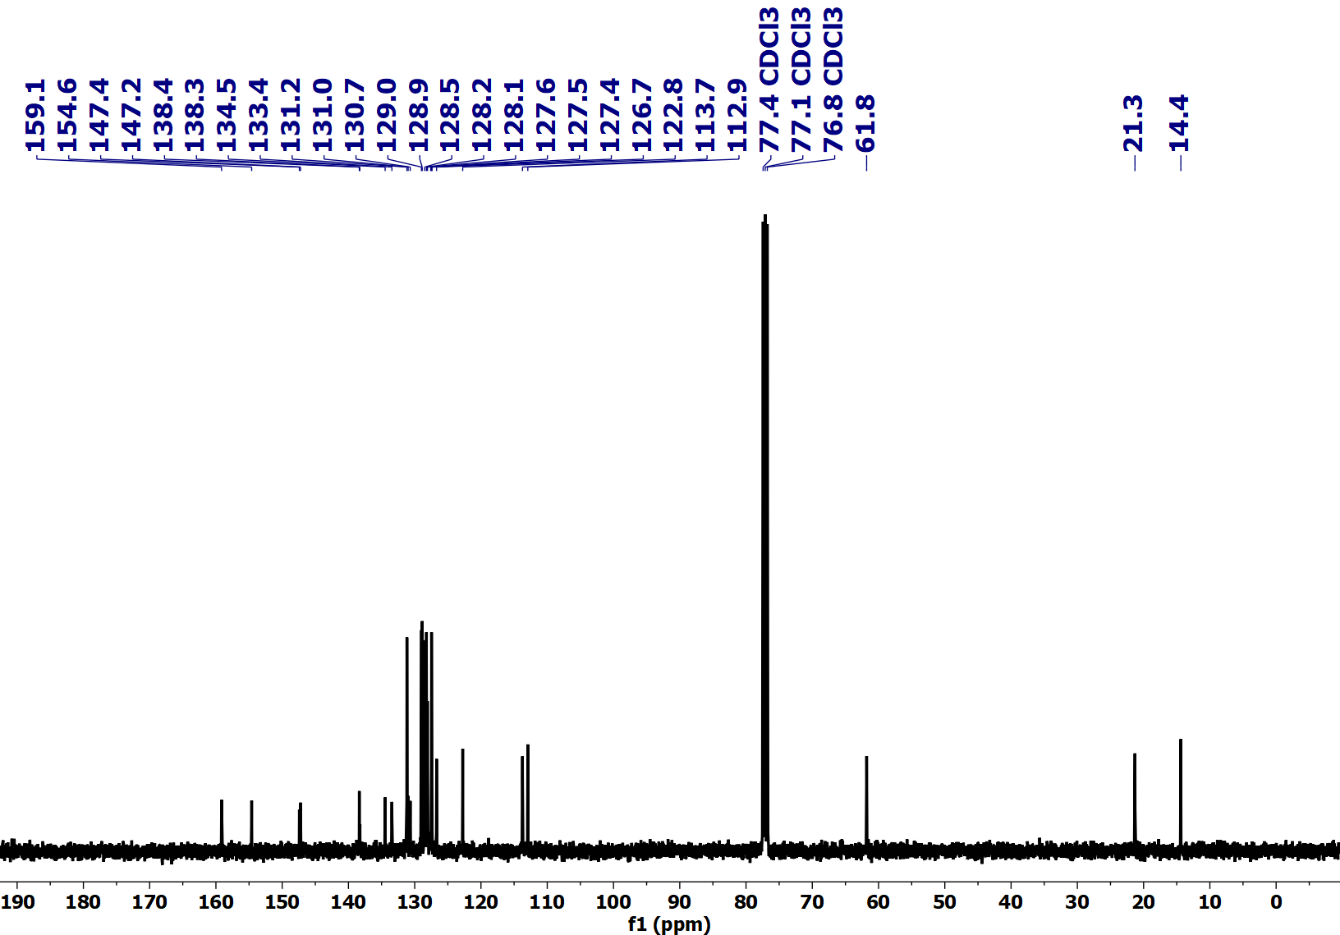
**

**Figure 10.** 13C NMR spectrum (100 MHz) of compound **2b** in CDCl3.

**Ethyl 5-[2-(4-methoxyphenyl)-4,5-diphenyl-1H-imidazol-1-yl]benzofuran-2-carboxylate (2c)**

**
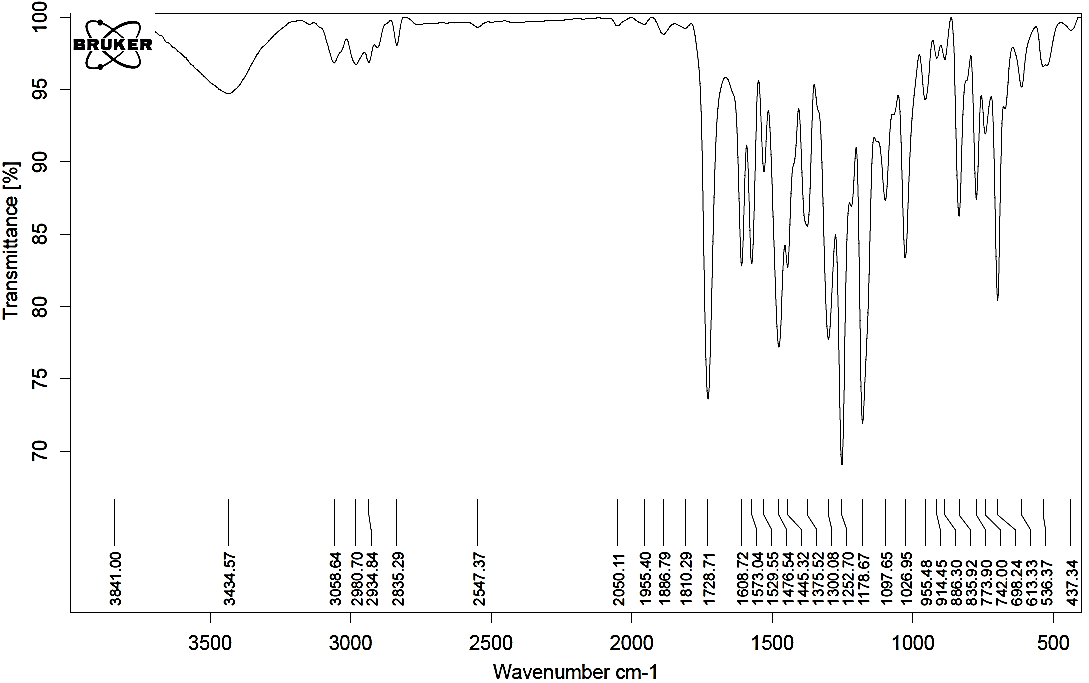
**

**Figure 11**. FT-IR spectrum of compound **2c.**

**
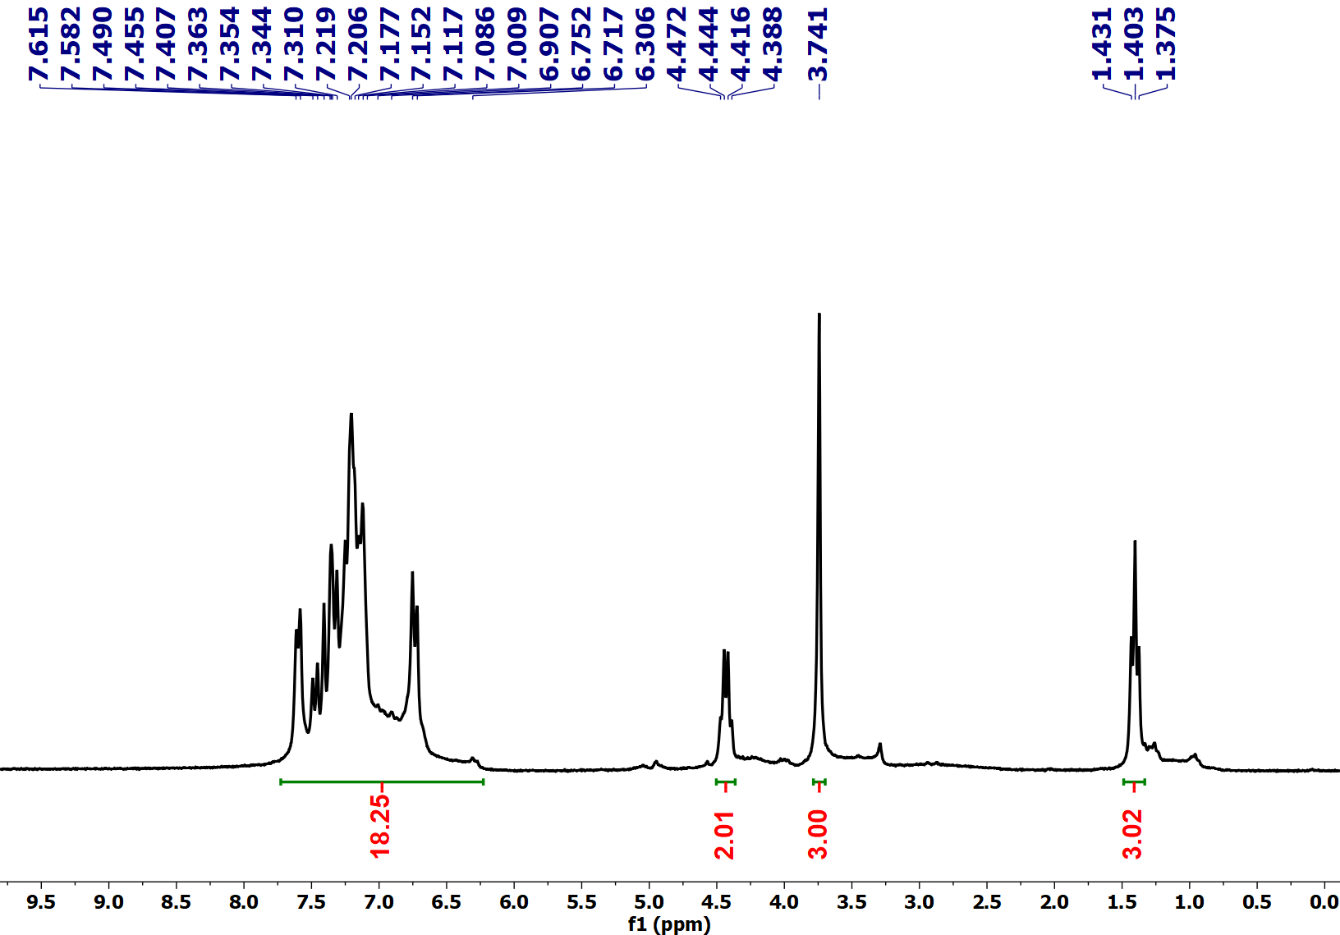
****Figure 12.** 1H NMR spectrum (250 MHz) of compound **2c** in CDCl3.

**
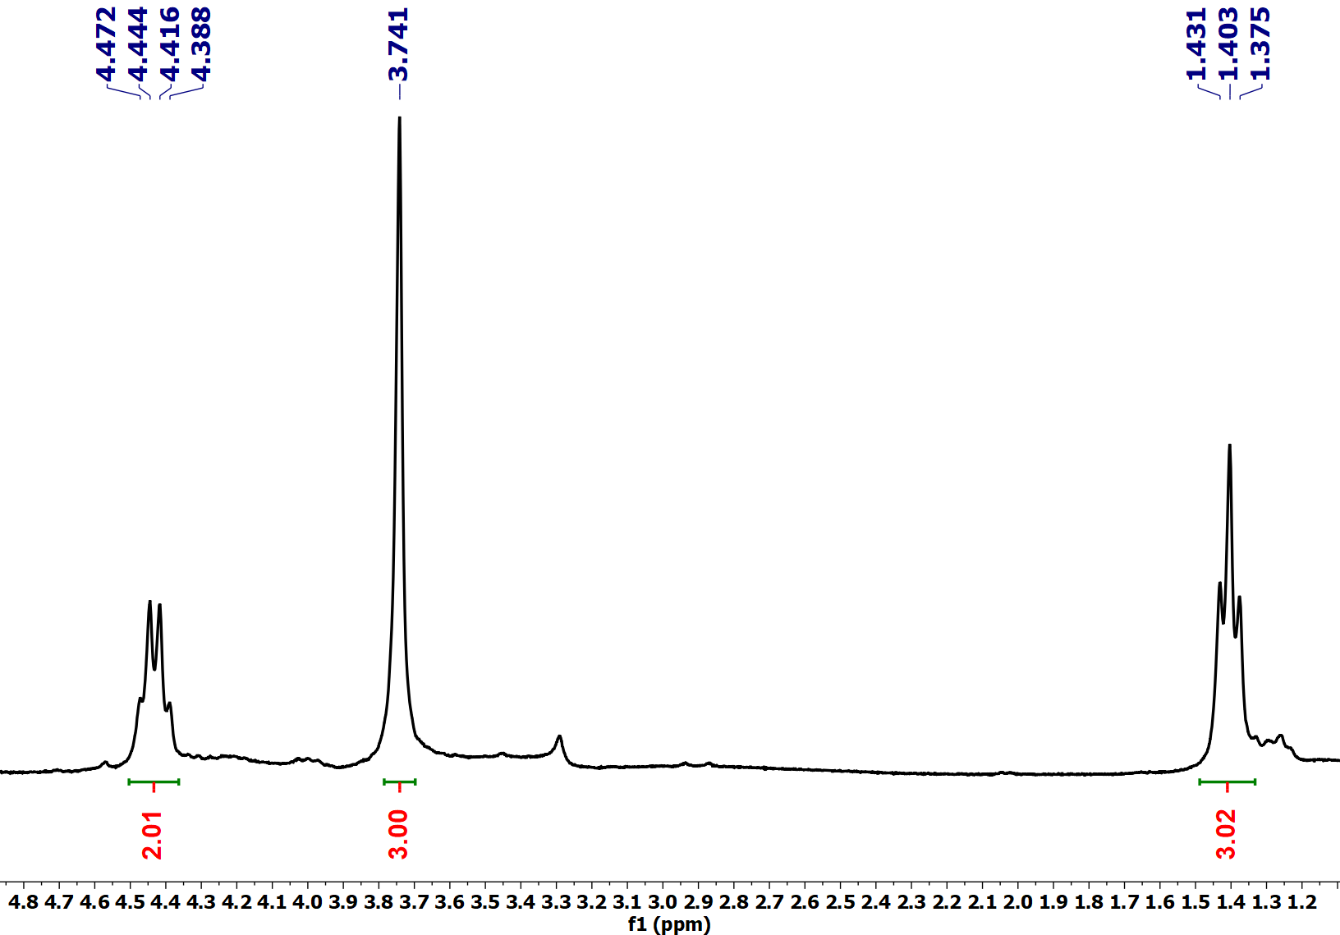
Figure 13.** Expanded (1) 1H NMR spectrum (250 MHz) of compound **2c** in CDCl3.


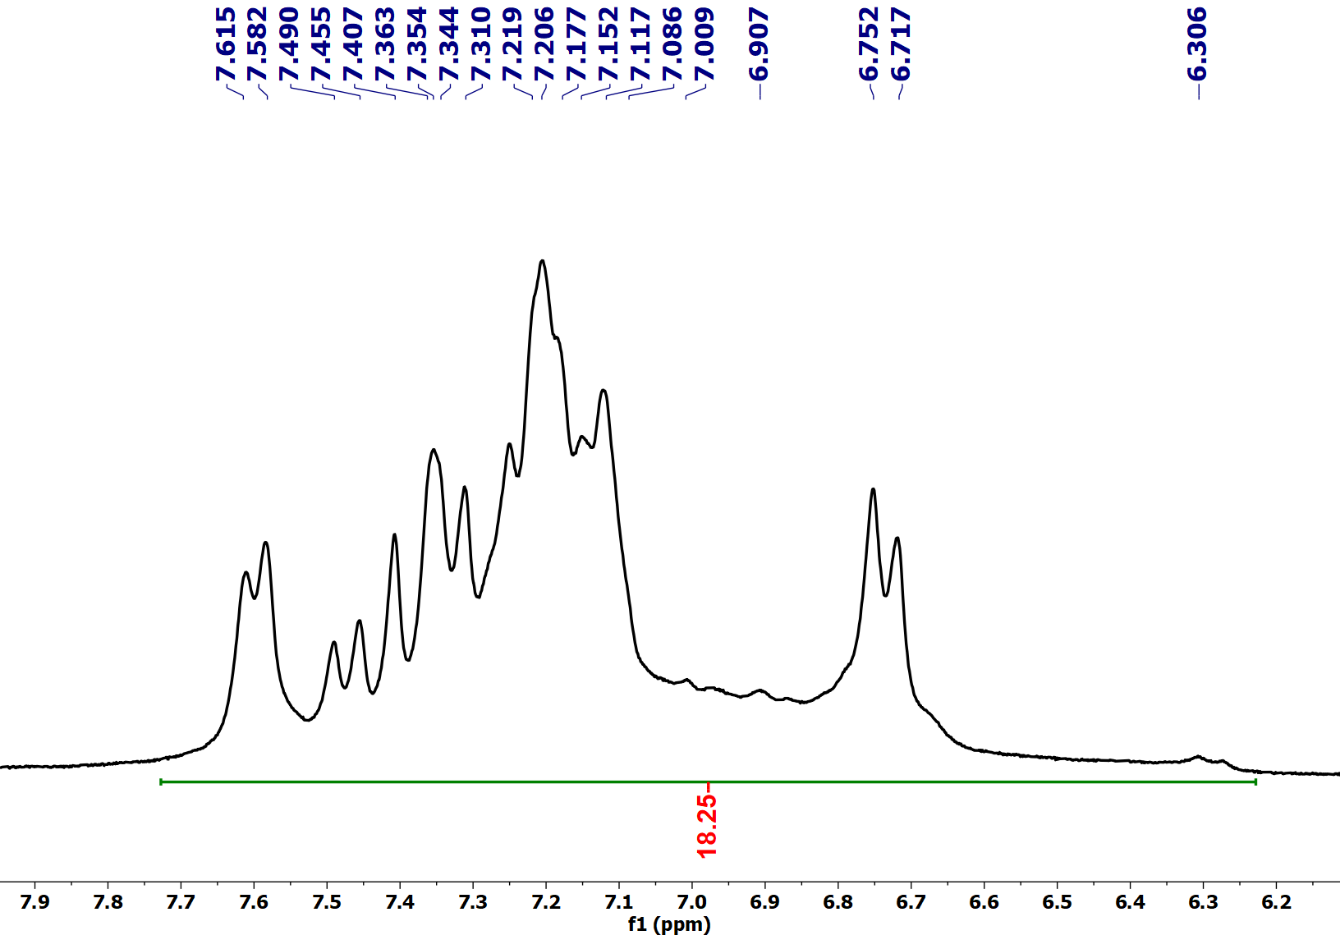
**Figure 14.** Expanded (2) 1H NMR spectrum (250 MHz) of compound **2c** in CDCl3.


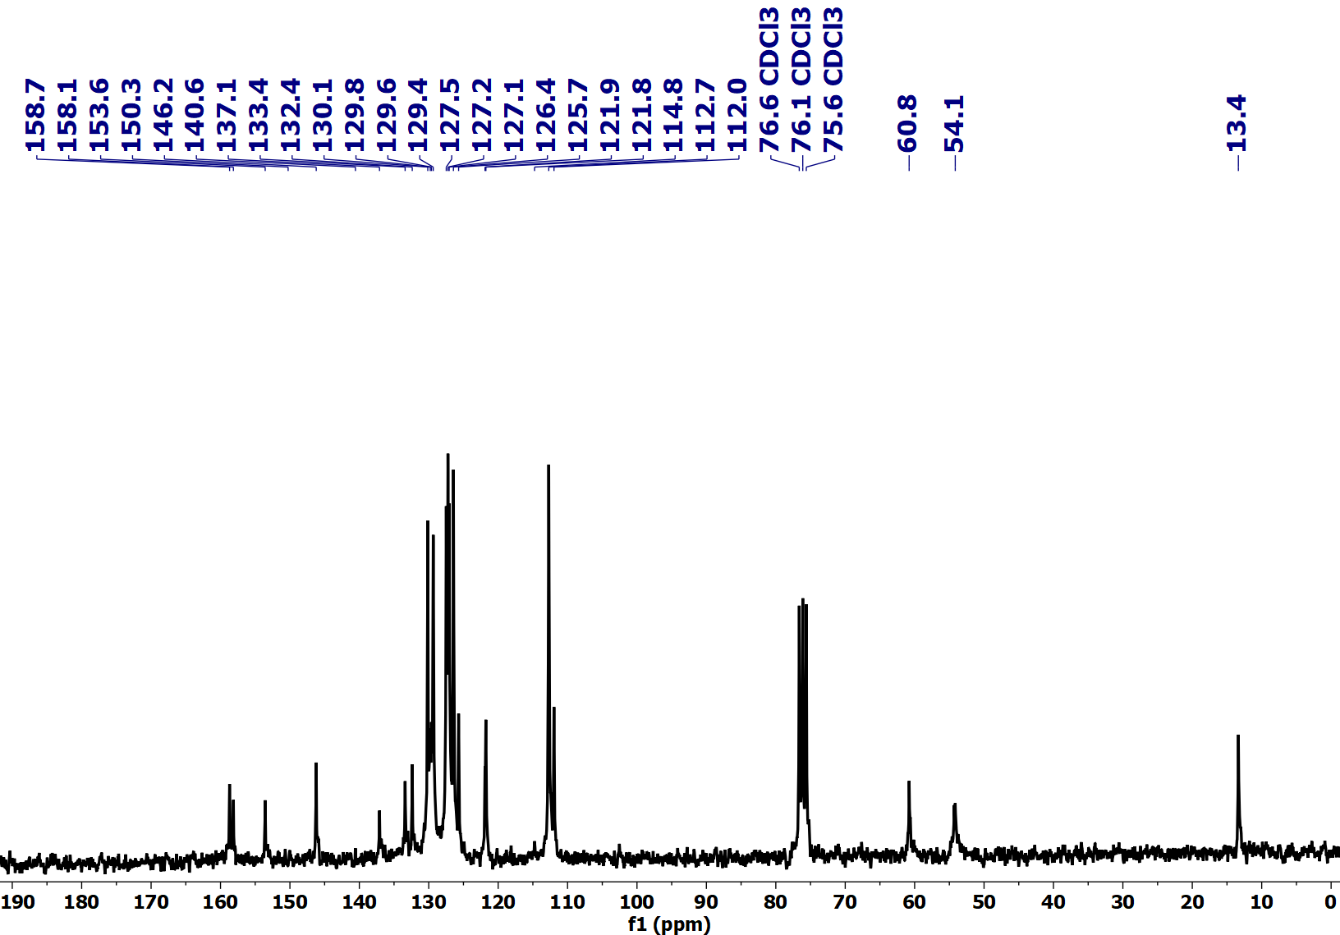
**Figure 15.** 13C NMR spectrum (65 MHz) of compound **2c** in CDCl3.

**Ethyl 5-[2-(3-nitrophenyl)-4,5-diphenyl-1H-imidazol-1-yl]benzofuran-2-carboxylate (2d)**

**
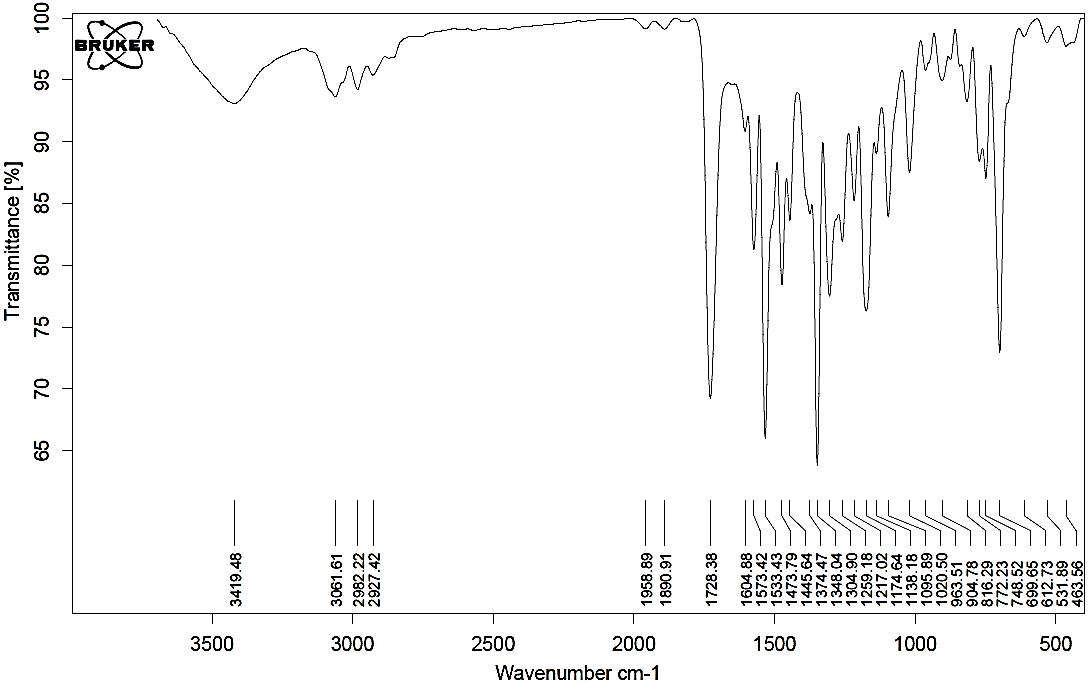
Figure 16**. FT-IR spectrum of compound **2d.**

**
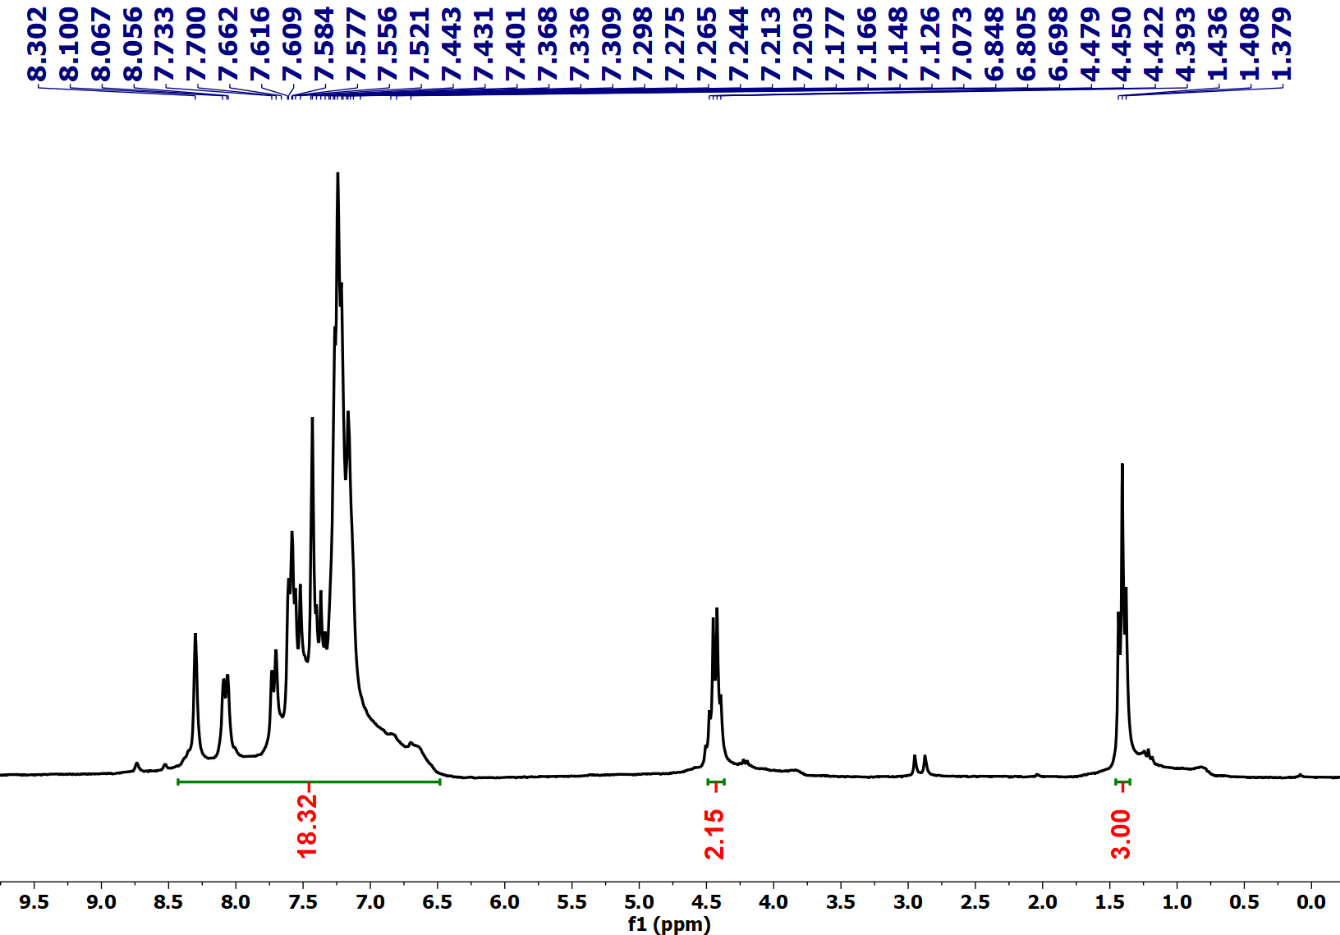
Figure 17.** 1H NMR spectrum (250 MHz) of compound **2d** in CDCl3.

**
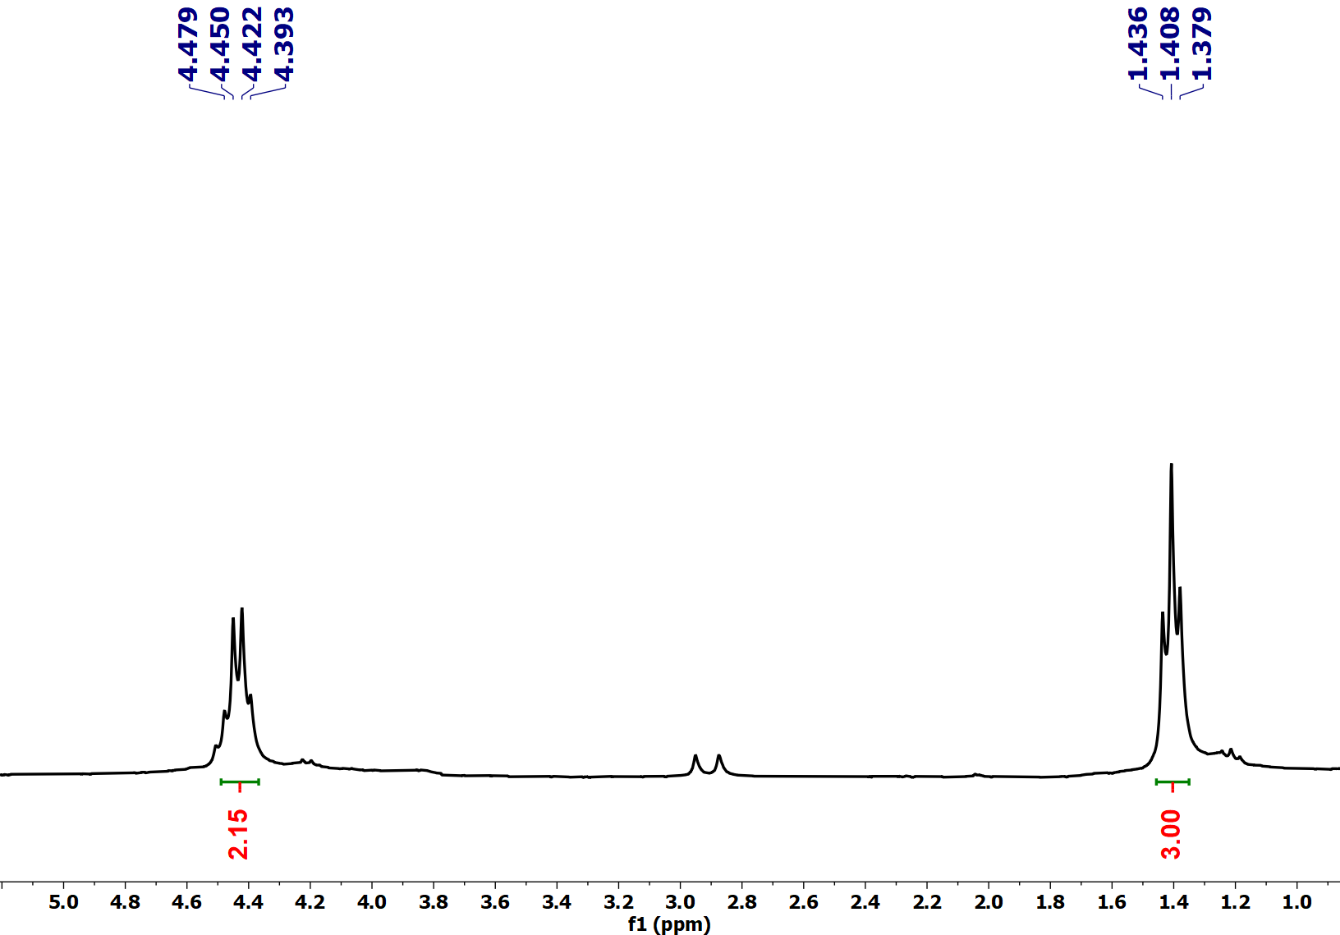
Figure 18.** Expanded (1) 1H NMR spectrum (250 MHz) of compound **2d** in CDCl3.

**
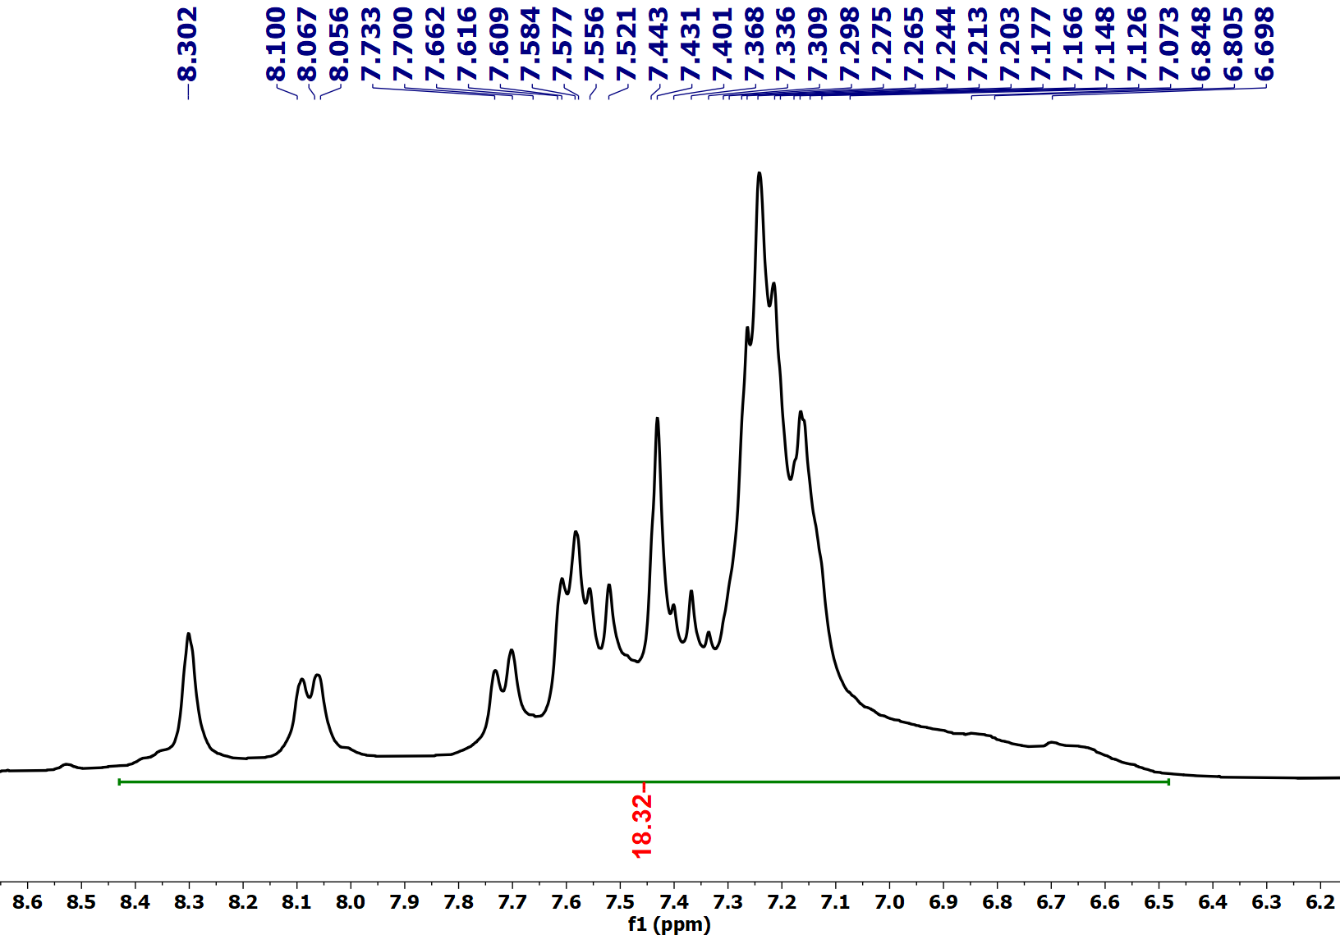
Figure 19.** Expanded (2) 1H NMR spectrum (250 MHz) of compound **2d** in CDCl3.


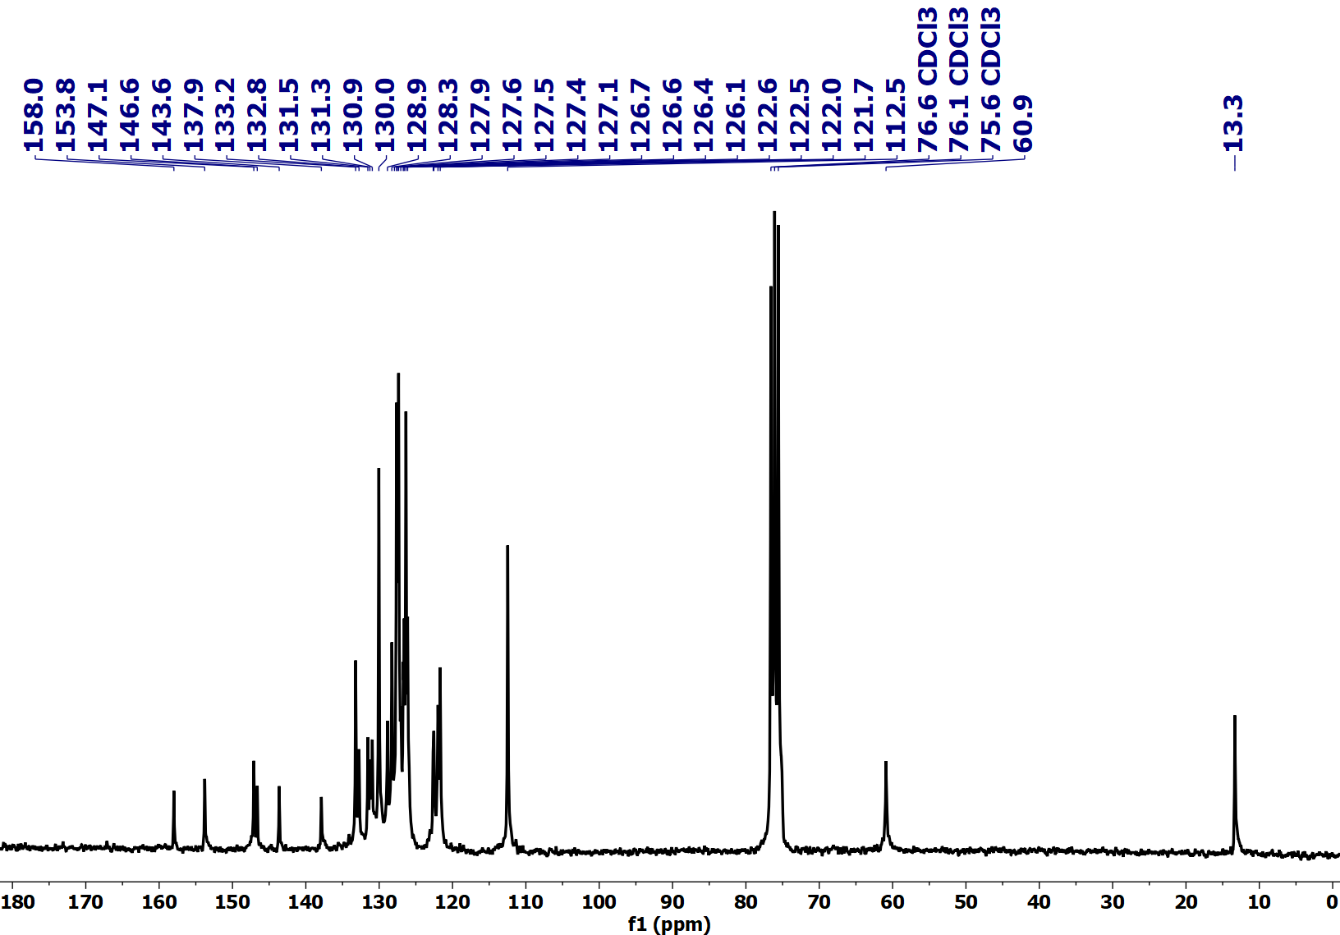
**Figure 20.** 13C NMR spectrum (65 MHz) of compound **2d** in CDCl3.

**(*E*)- Ethyl -3-[2-hydroxy-5-(2,4,5-triphenyl-1*H*-imidazol-1-yl)phenyl]acrylate (3a)**


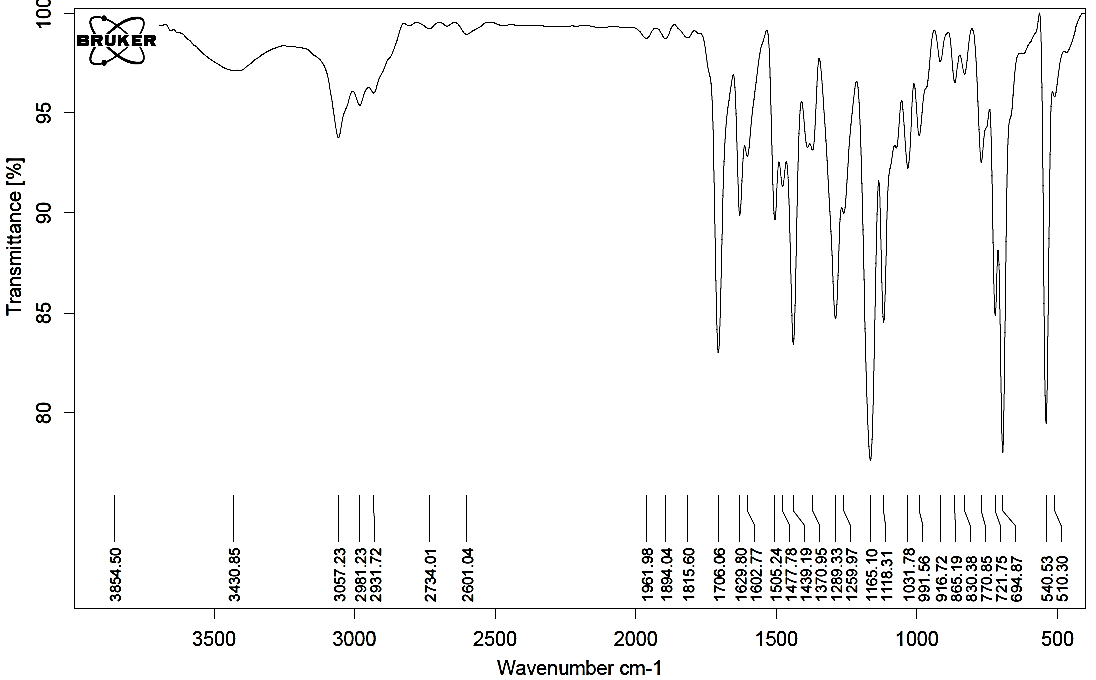
**Figure 21**. FT-IR spectrum of compound **3a.**


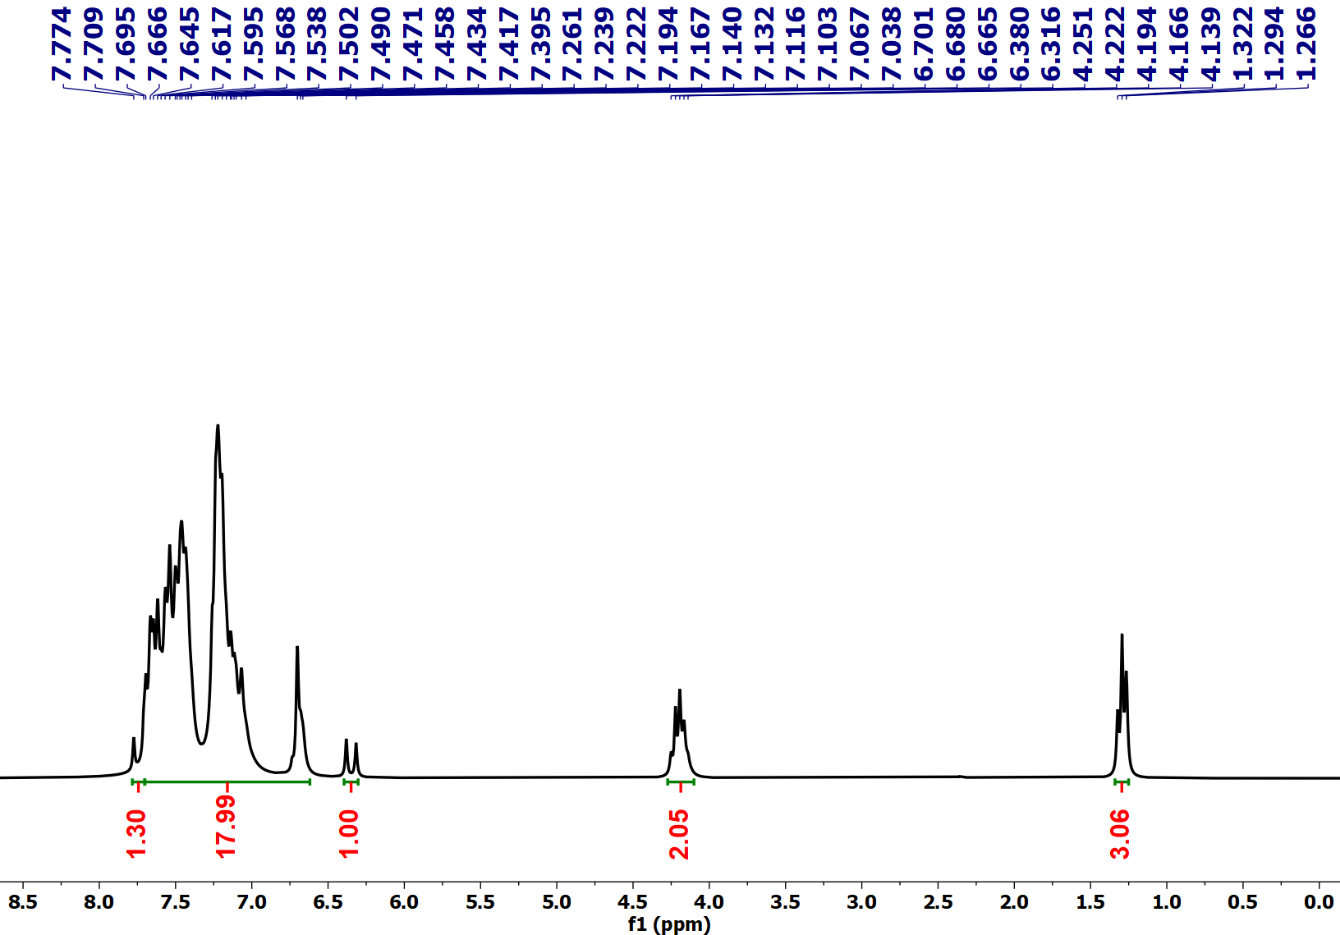
**Figure 22.** 1H NMR spectrum (250 MHz) of compound **3a** in CDCl3.


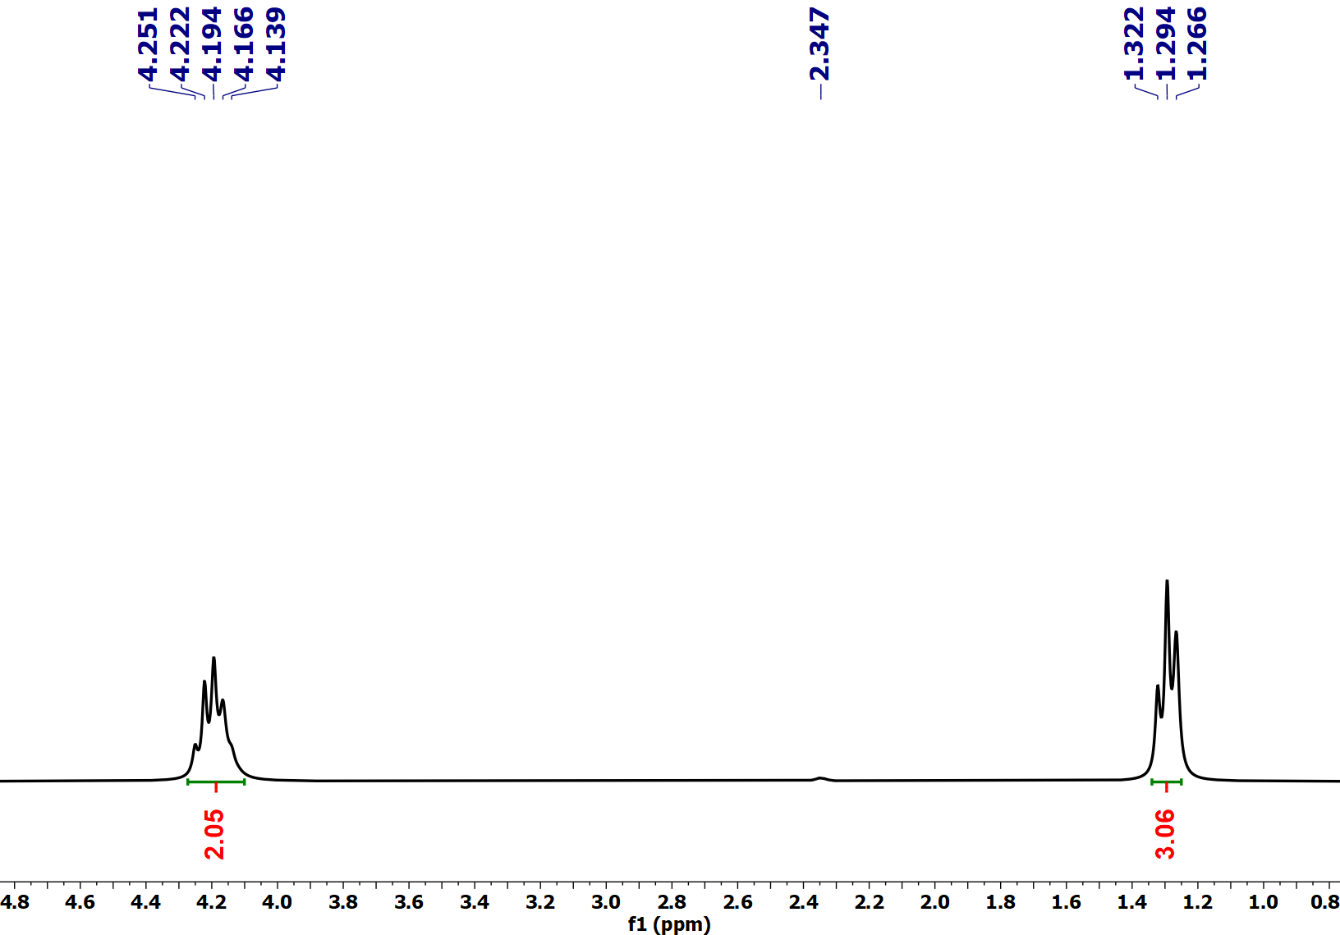
**Figure 23.** Expanded (1) 1H NMR spectrum (250 MHz) of compound **3a** in CDCl3.


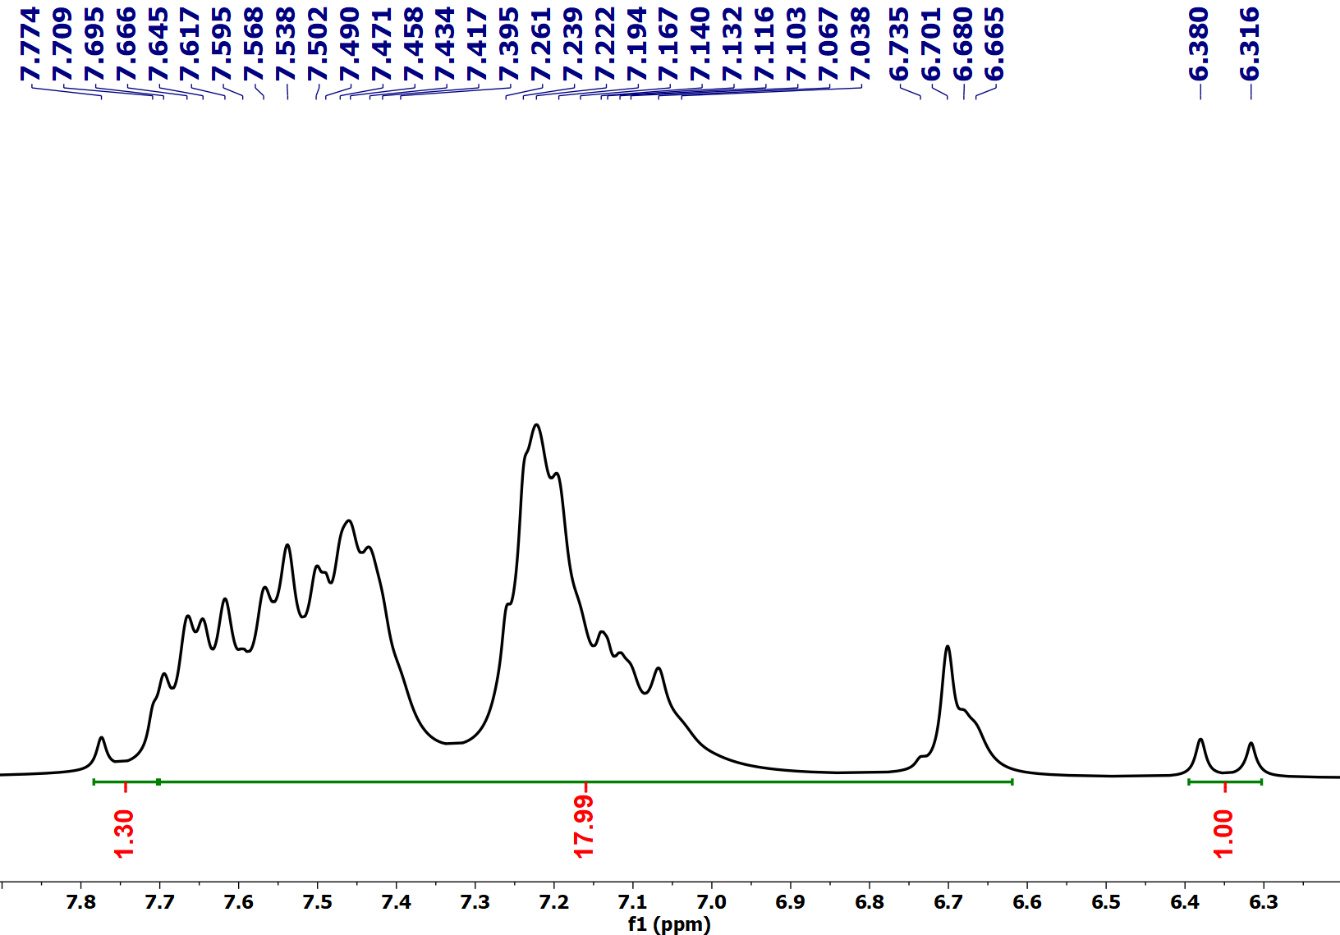
**Figure 24.** Expanded (2) 1H NMR spectrum (250 MHz) of compound **3a** in CDCl3.


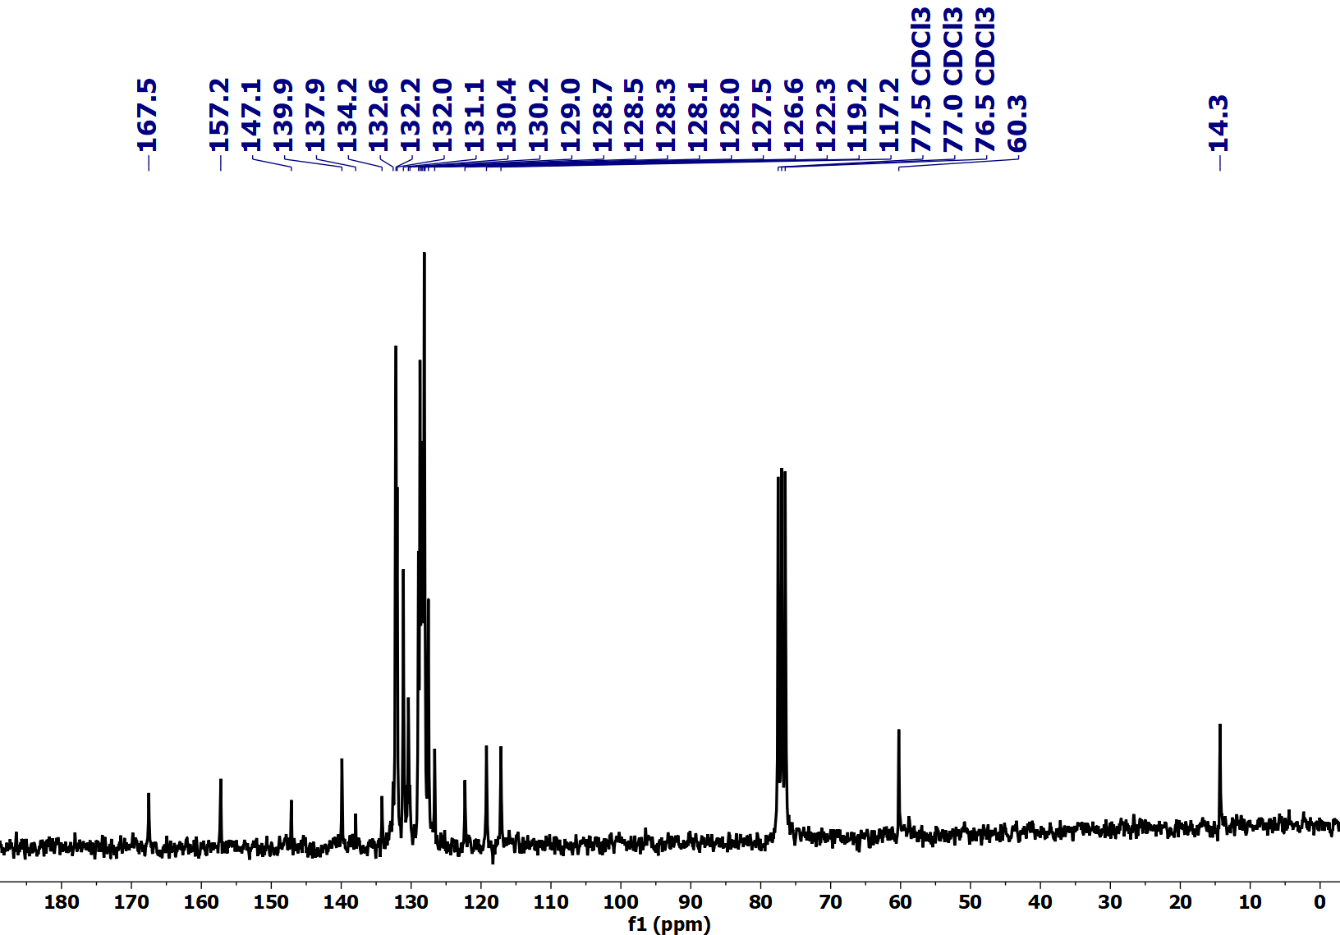
**Figure 25.** 13C NMR spectrum (65 MHz) of compound **3a** in CDCl3.

**(*E*)-Ethyl-3-{5-[4,5-diphenyl-2-(*p*-tolyl)-1*H*-imidazol-1-yl]-2-hydroxyphenyl} acrylate (3b)**


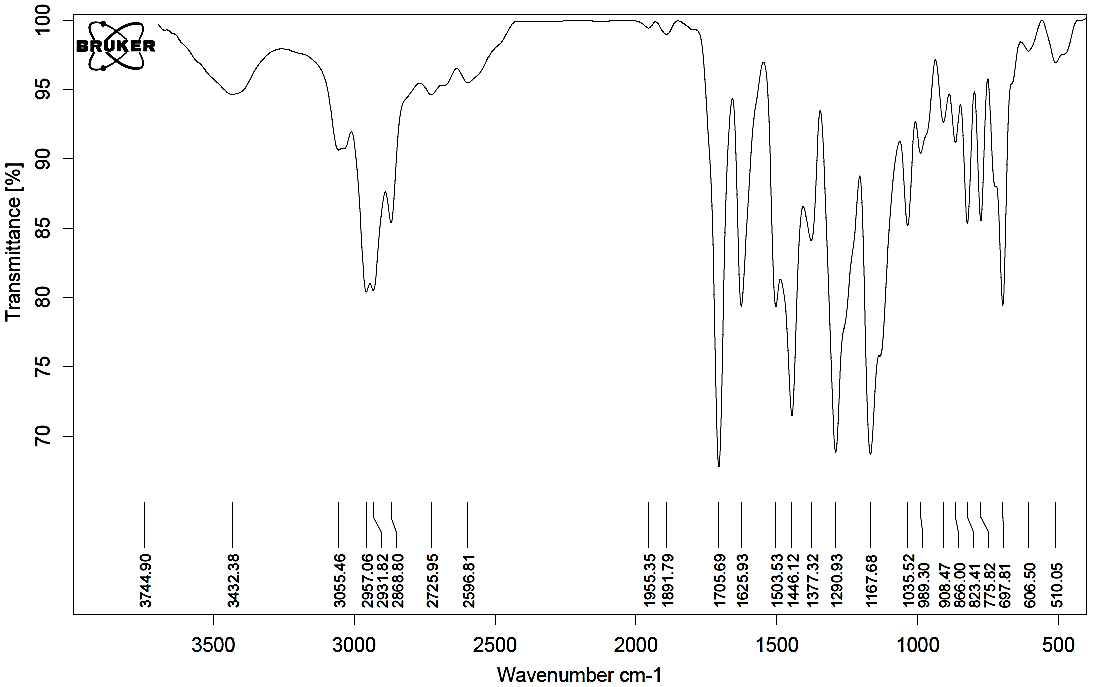
**Figure 26**. FT-IR spectrum of compound **3b.**


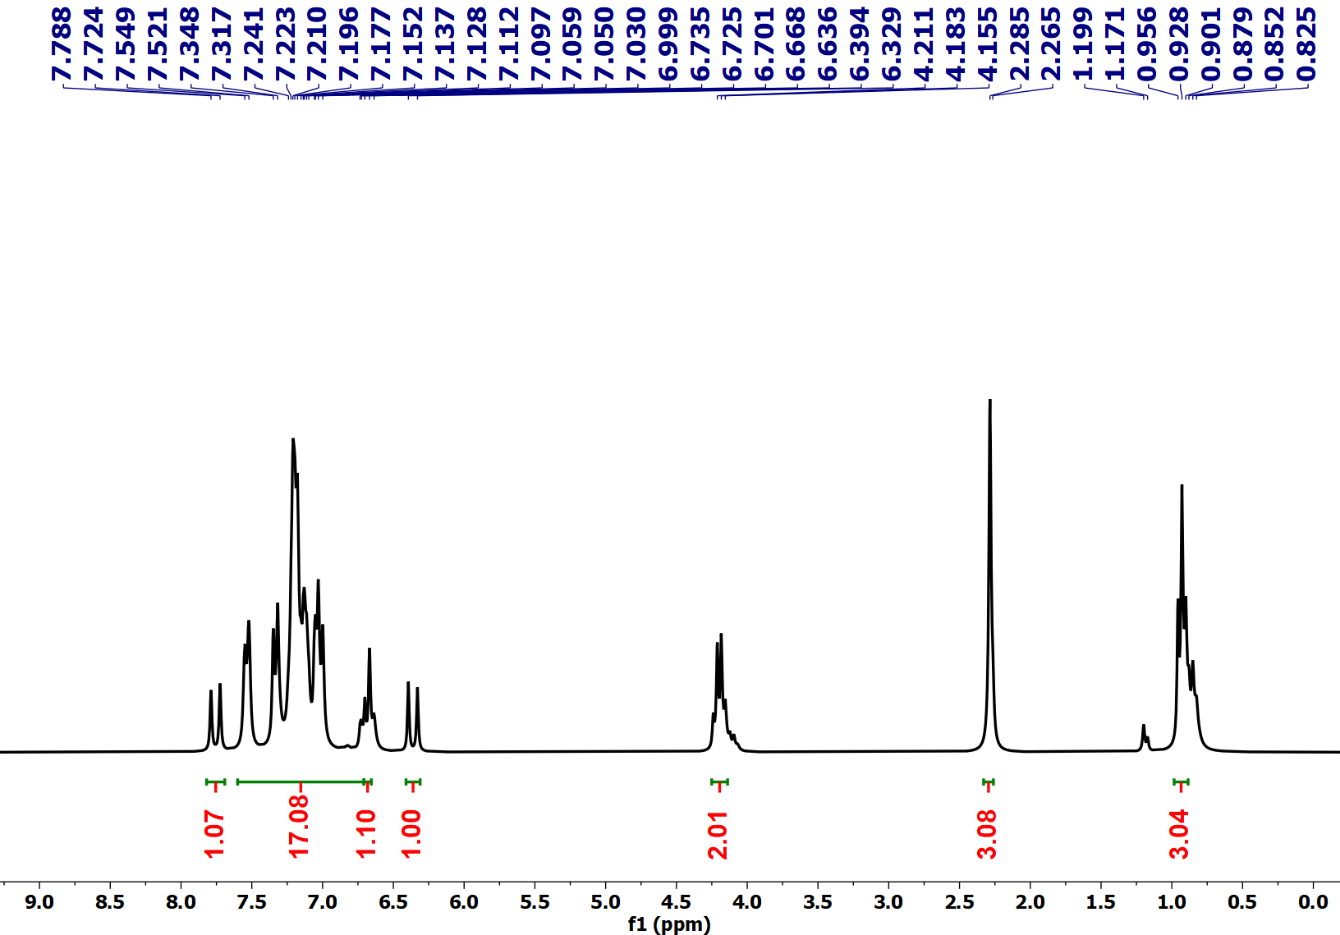
**Figure 27.** 1H NMR spectrum (250 MHz) of compound **3b** in CDCl3.


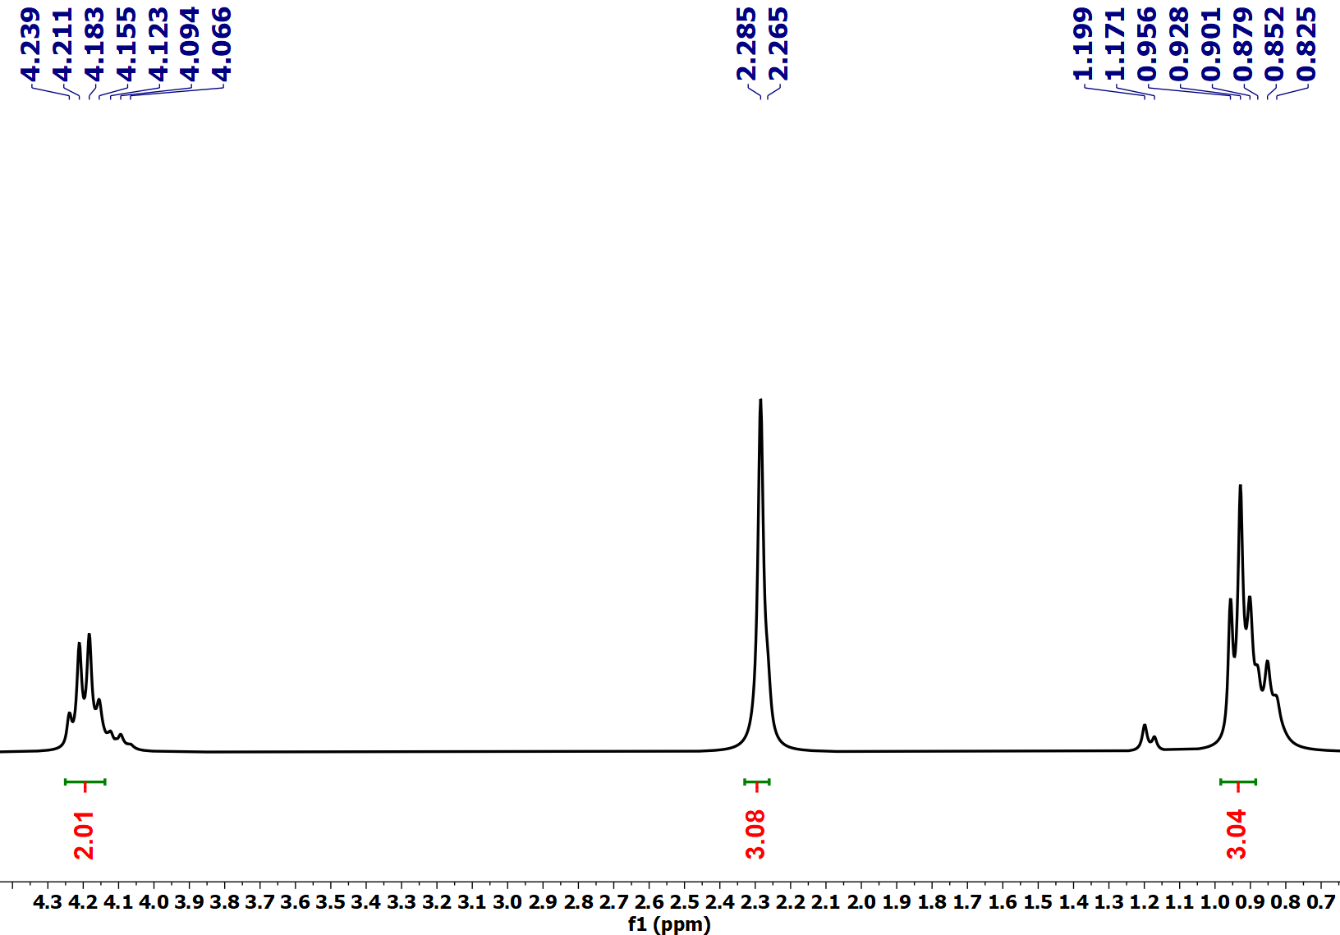
**Figure 28.** Expanded (1) 1H NMR spectrum (250 MHz) of compound **3b** in CDCl3.


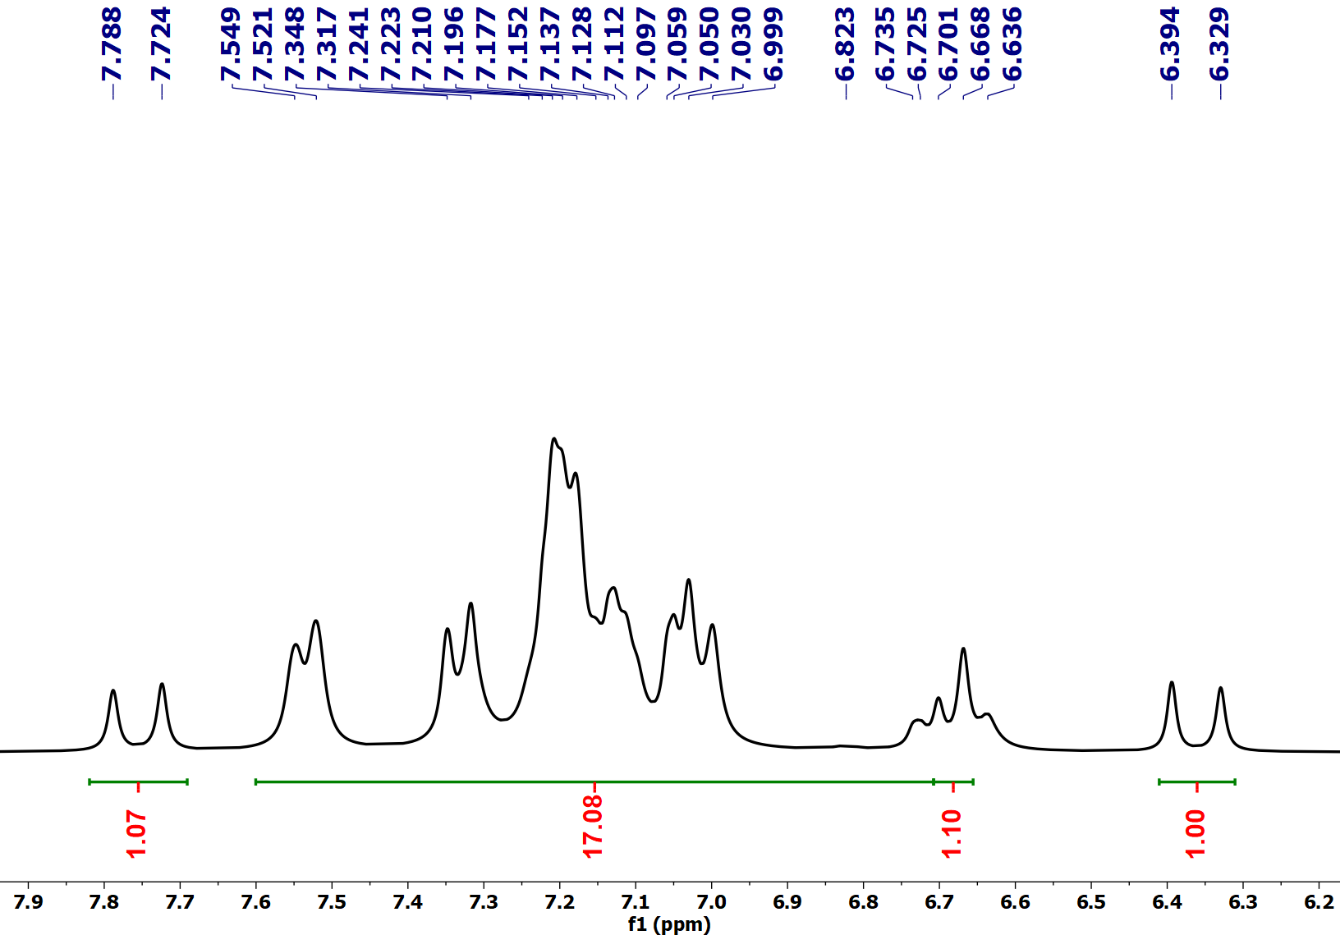
**Figure 29.** Expanded (2) 1H NMR spectrum (250 MHz) of compound **3b** in CDCl3.

a


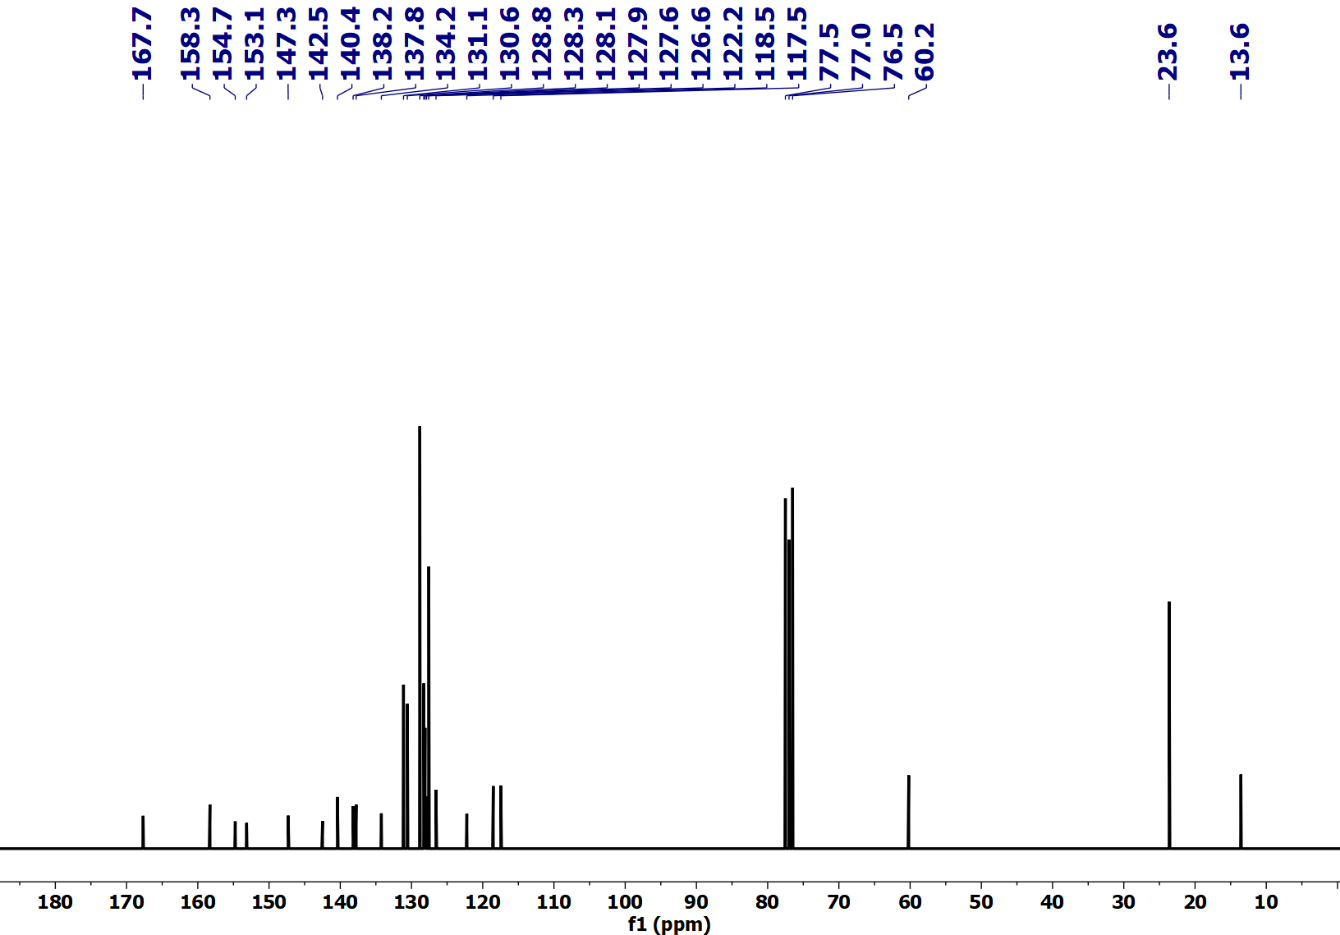
**Figure 30.** 13C NMR spectrum (65 MHz) of compound **3b** in CDCl3.

**(*E*) -Ethyl 3-{2-hydroxy-5-[2-(4-methoxyphenyl)-4,5-diphenyl-1*H*-imidazol-1-yl]phenyl} acrylate (3c)**


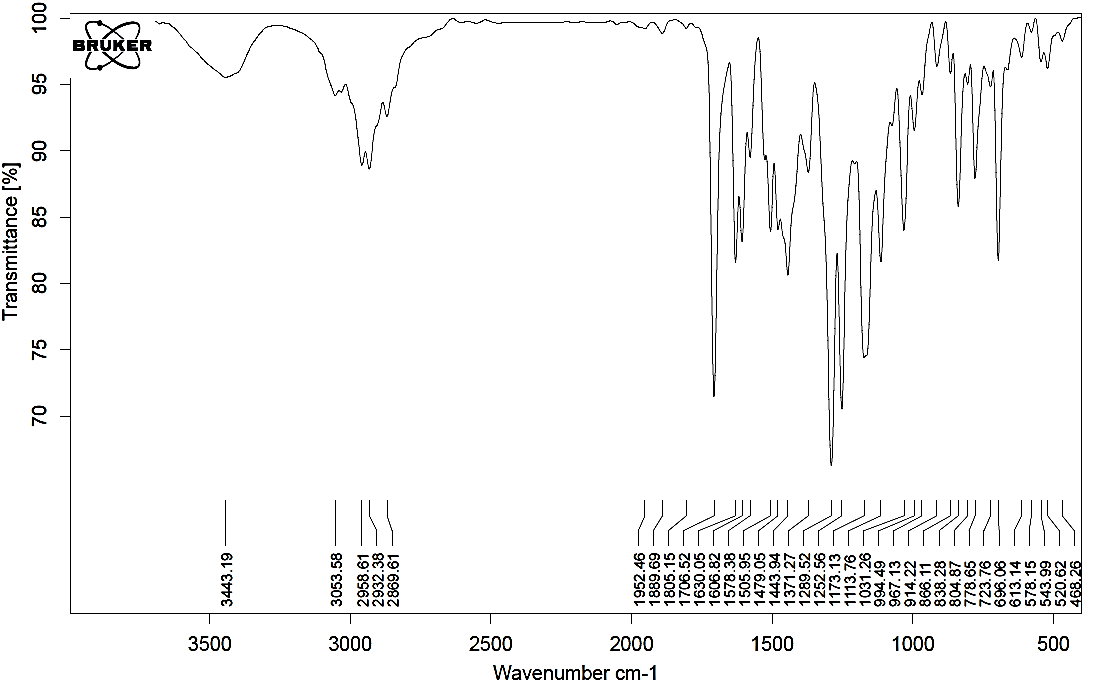
**Figure 31**. FT-IR spectrum of compound **3c.**


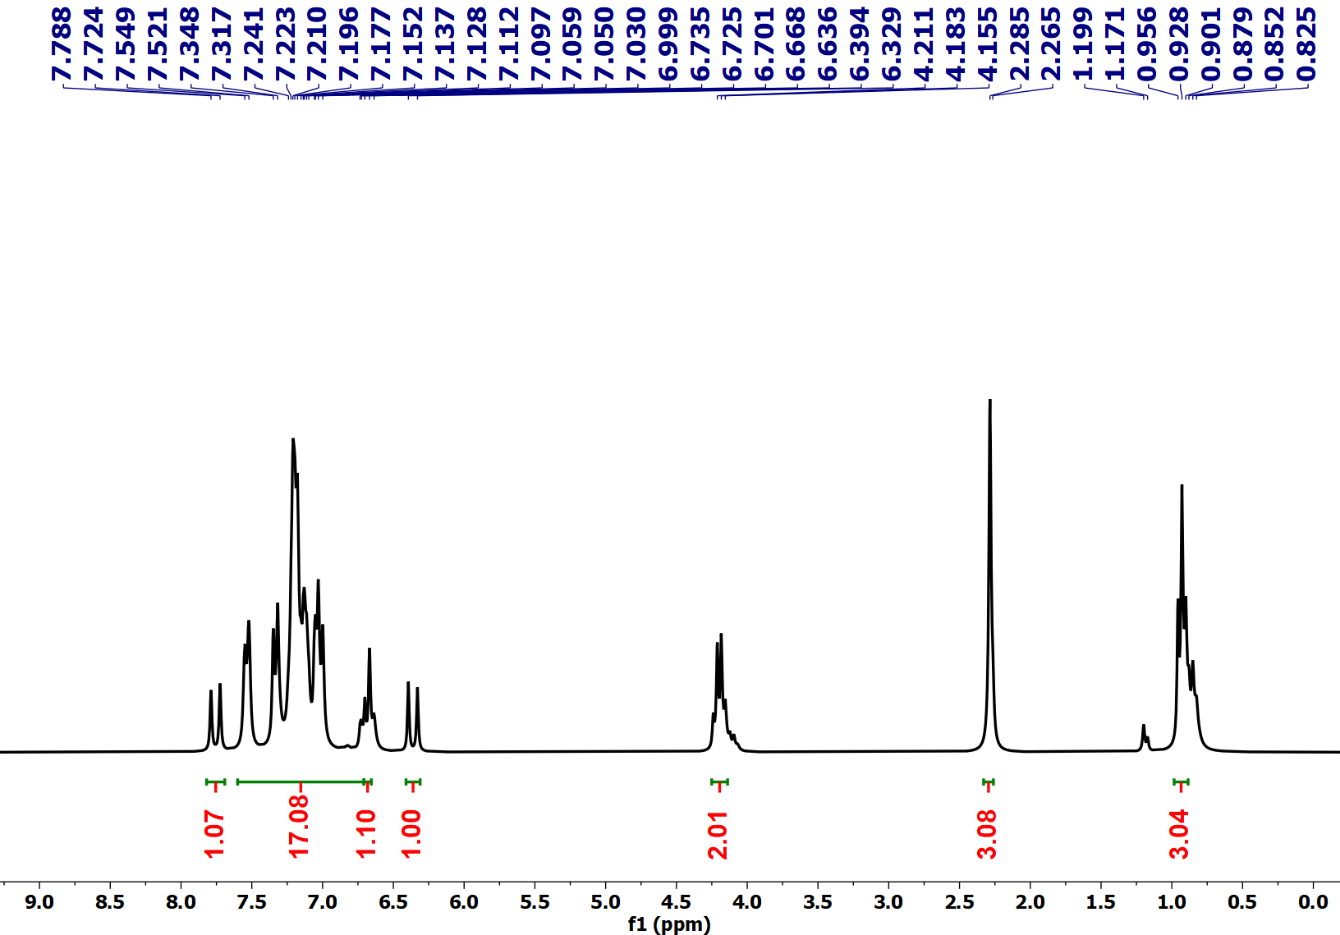
**Figure 32.** 1H NMR spectrum (250 MHz) of compound **3c** in CDCl3.


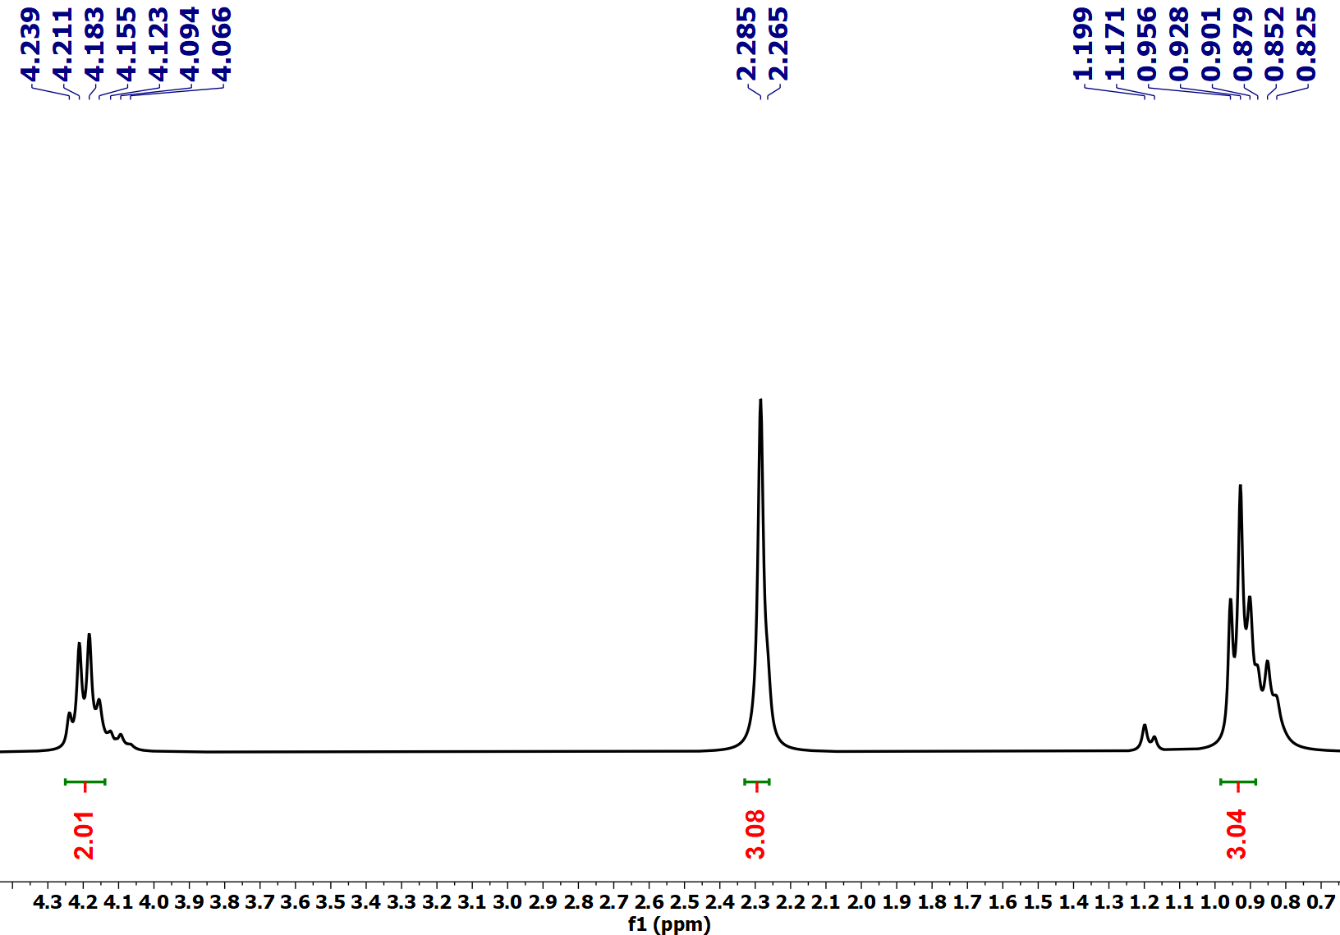
**Figure 33.** Expanded (1) 1H NMR spectrum (250 MHz) of compound **3c** in CDCl3.


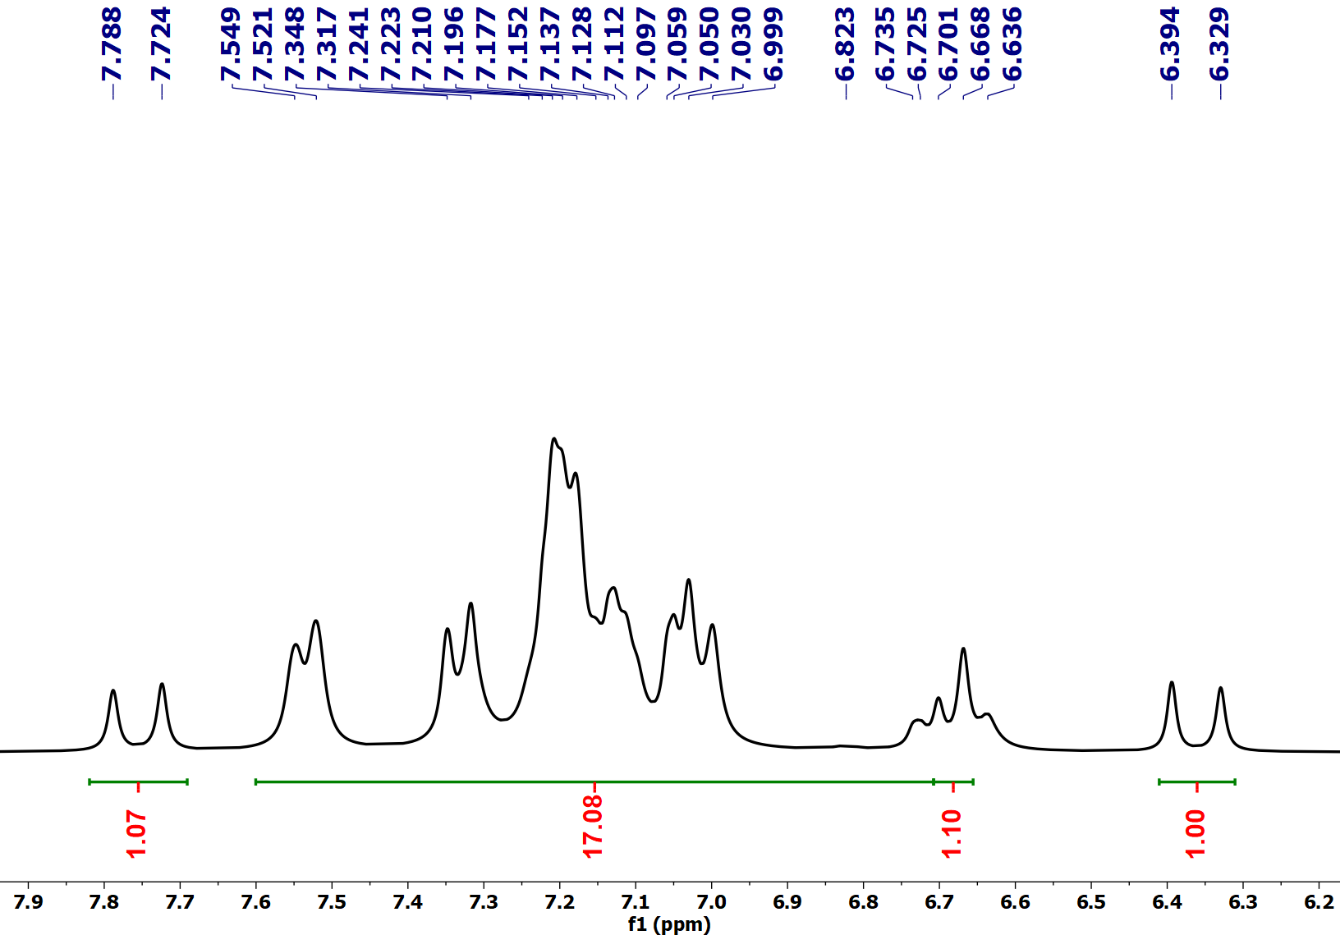
**Figure 34.** Expanded (2) 1H NMR spectrum (250 MHz) of compound **3c** in CDCl3.

a


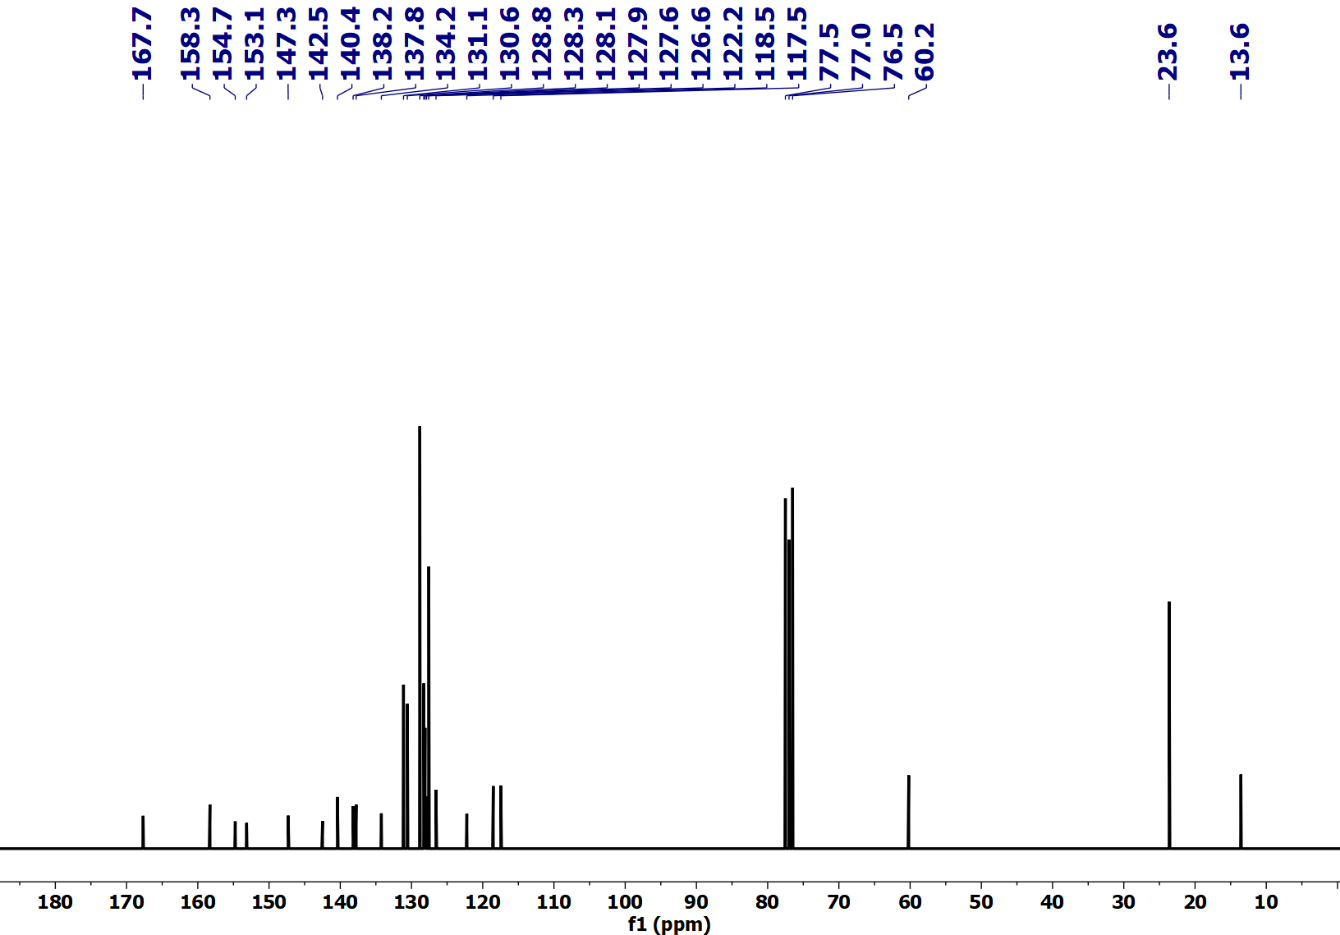
**Figure 35.** 13C NMR spectrum (65 MHz) of compound **3c** in CDCl3.

**(*E*)-Ethyl -3-{2-hydroxy-5-[2-(3-nitrophenyl)-4,5-diphenyl-1*H*-imidazol-1-yl] phenyl} acrylate (3d)**


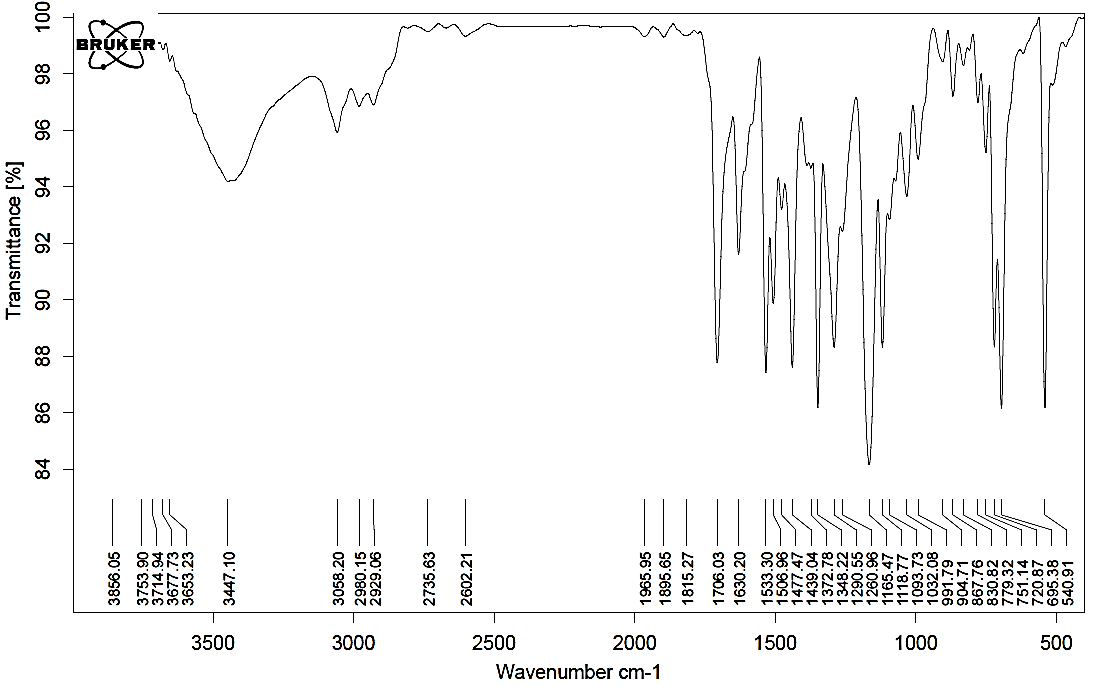
**Figure 36**. FT-IR spectrum of compound **3d.**


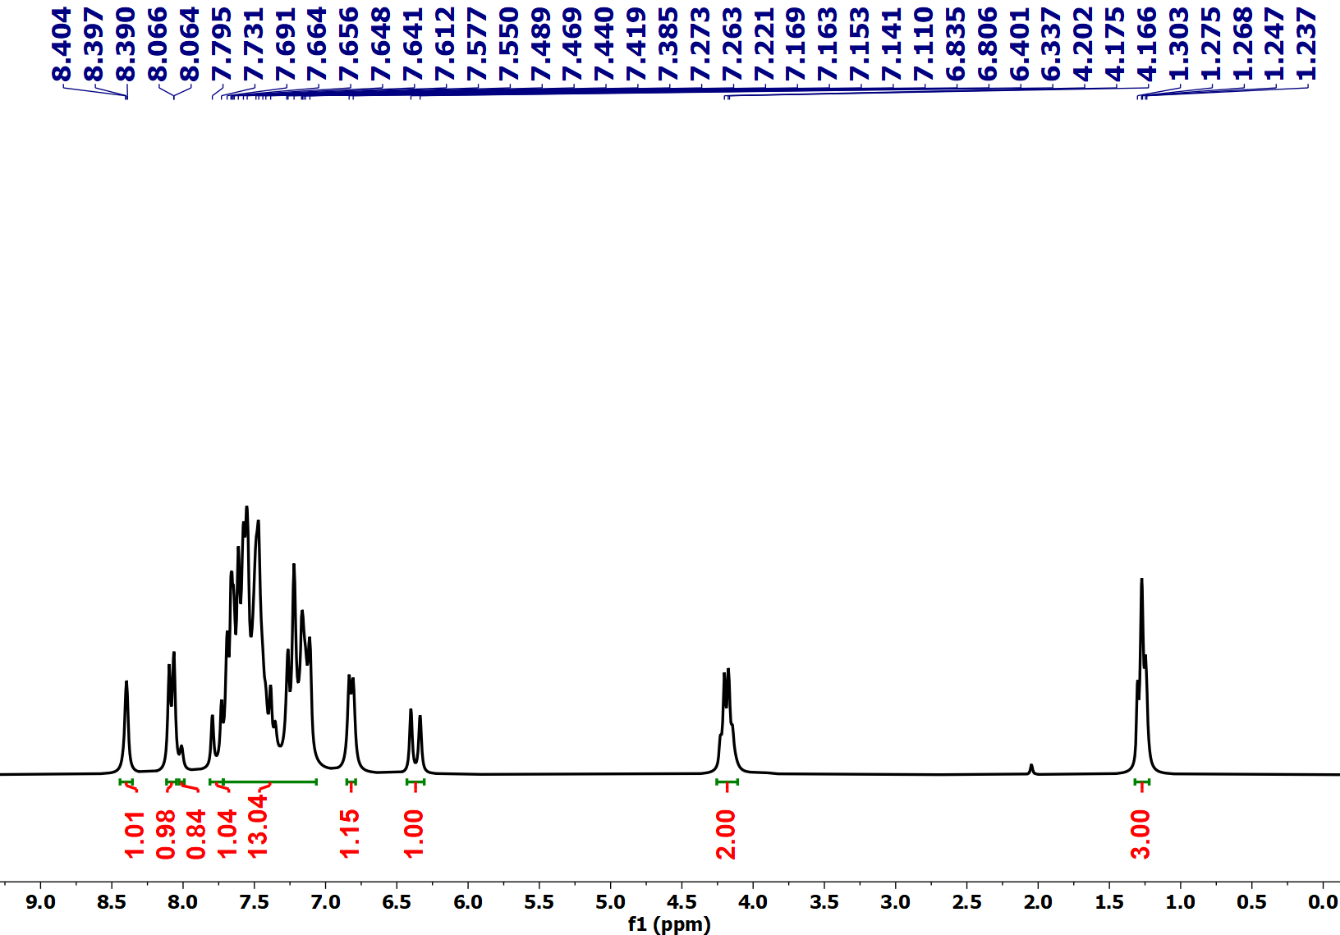
**Figure 37.** 1H NMR spectrum (250 MHz) of compound **3d** in CDCl3.

a

c

b


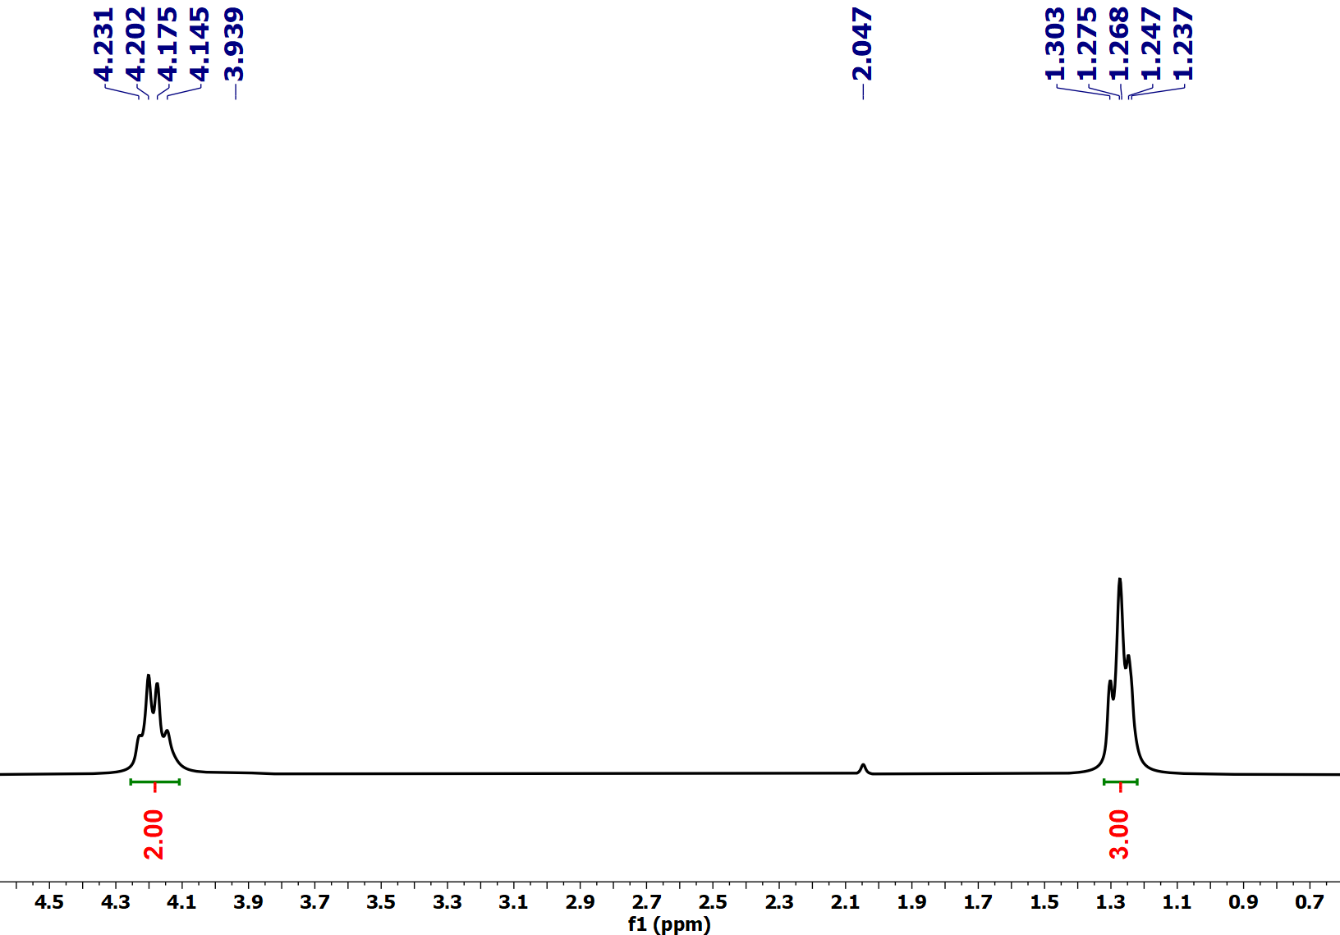
**Figure 38.** Expanded (1) 1H NMR spectrum (250 MHz) of compound **3d** in CDCl3.


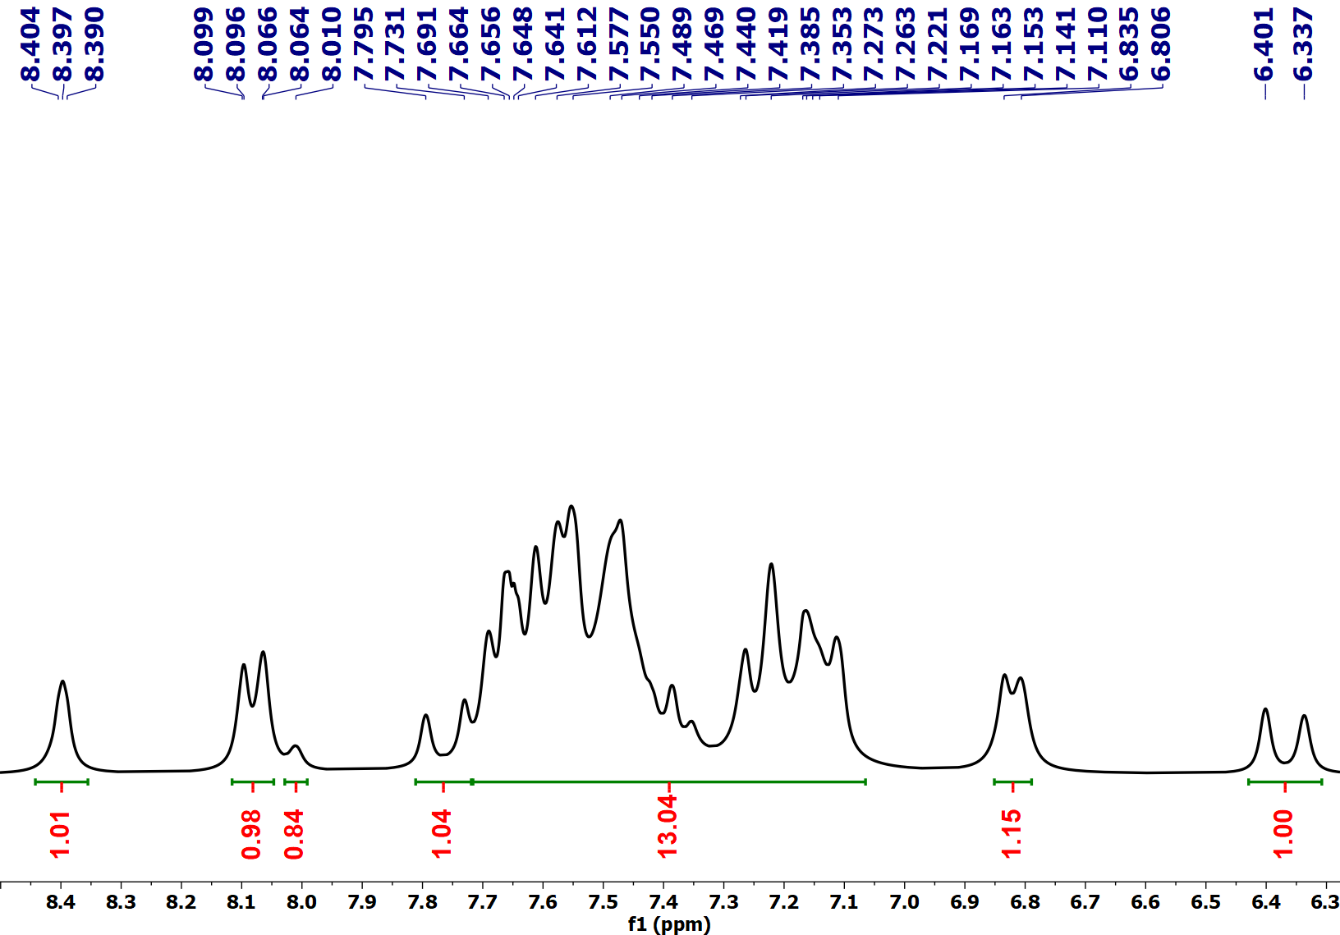
**Figure 39.** Expanded (2) 1H NMR spectrum (250 MHz) of compound **3d** in CDCl3.

c

b

a


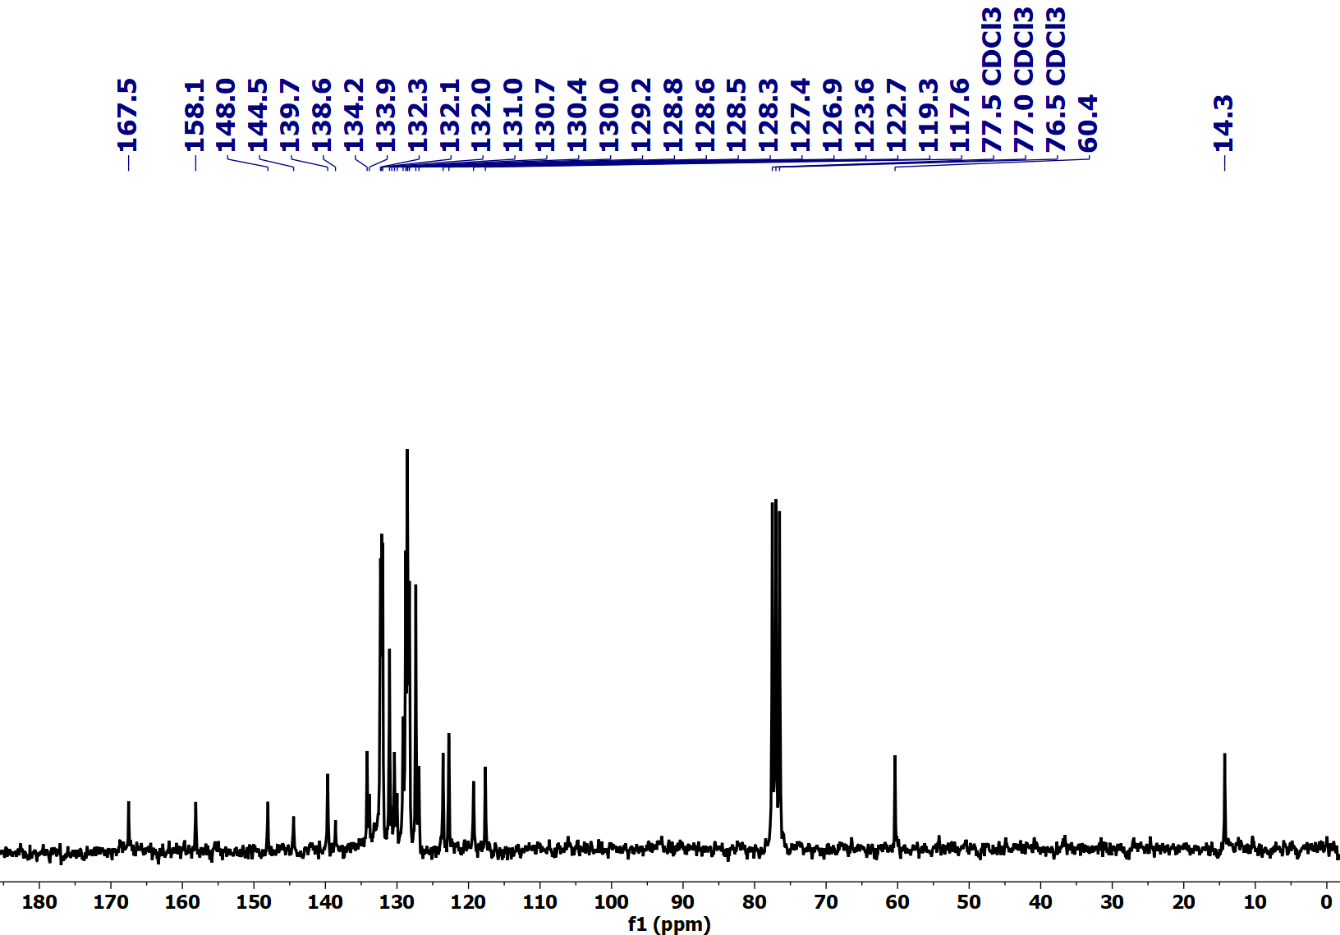
**Figure 40.** 13C NMR spectrum (65 MHz) of compound **3d** in CDCl3.

**(*E*)-Ethyl-3-{5-[4,5-diphenyl-2-(thiophen-3-yl)-1*H*-imidazol-1-yl]-2-hydroxy phenyl } acrylate (3e)**


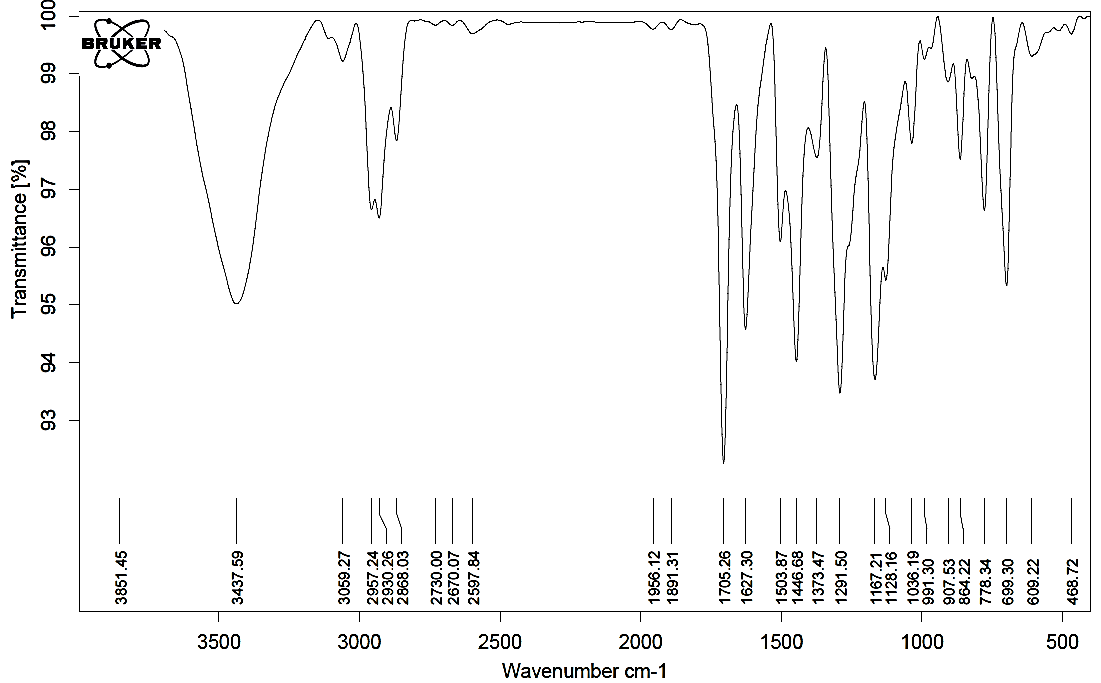
**Figure 41**. FT-IR spectrum of compound **3e.**


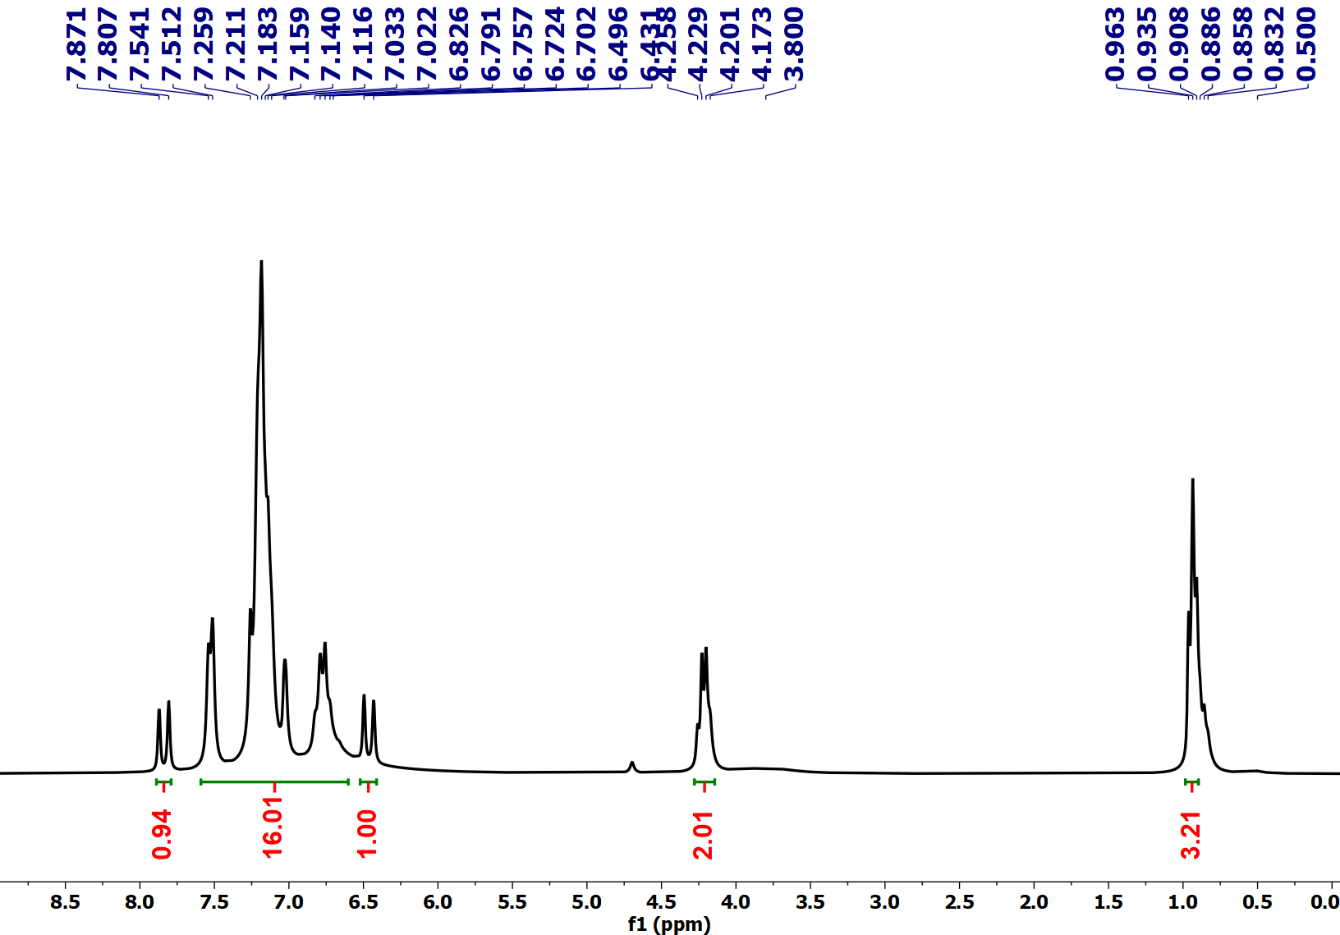
**Figure 42.** 1H NMR spectrum (250 MHz) of compound **3e** in CDCl3.


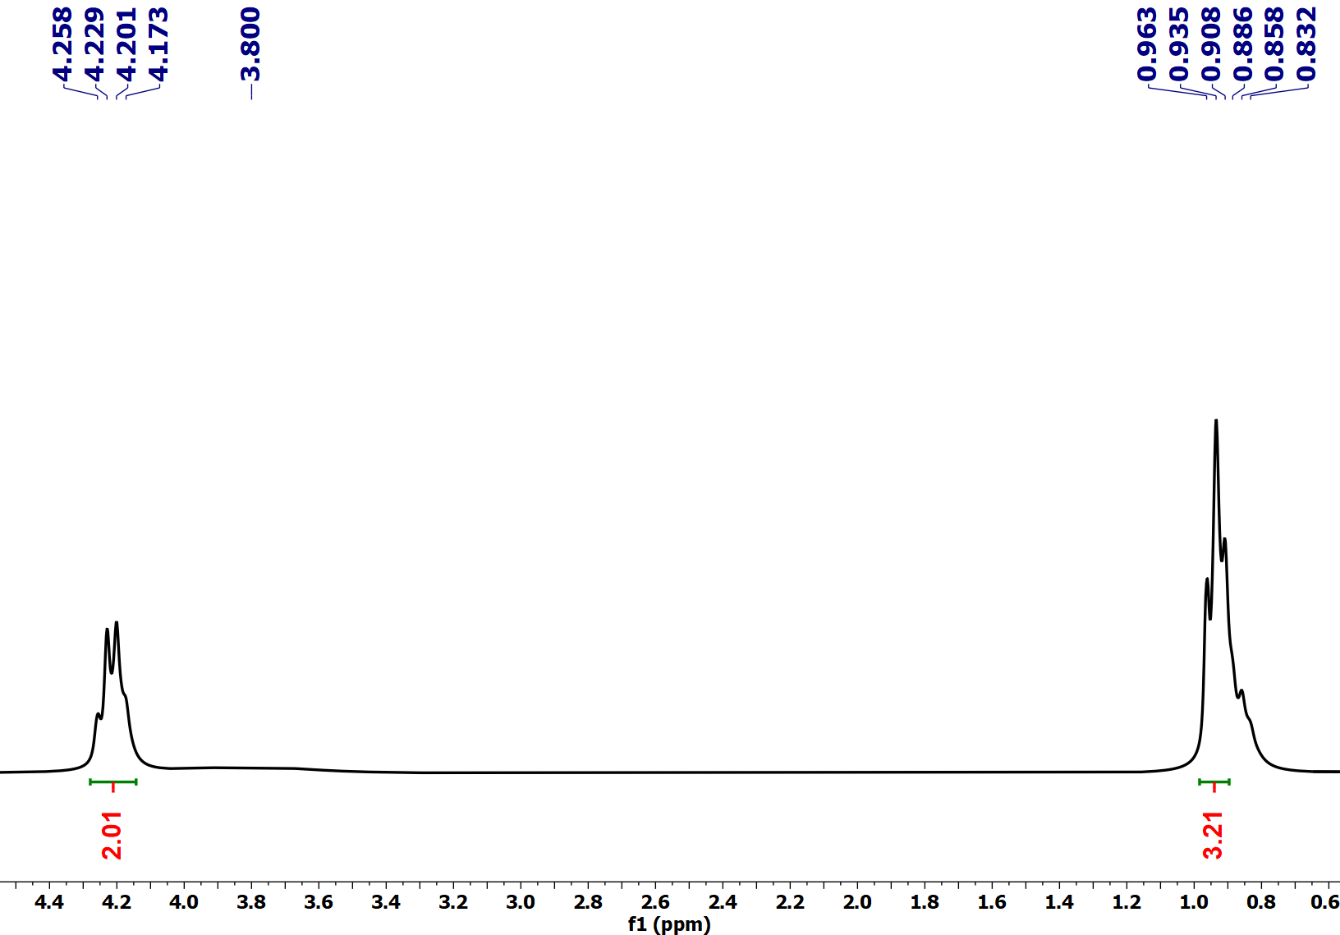
**Figure 43.** Expanded (1) 1H NMR spectrum (250 MHz) of compound **3e** in CDCl3.


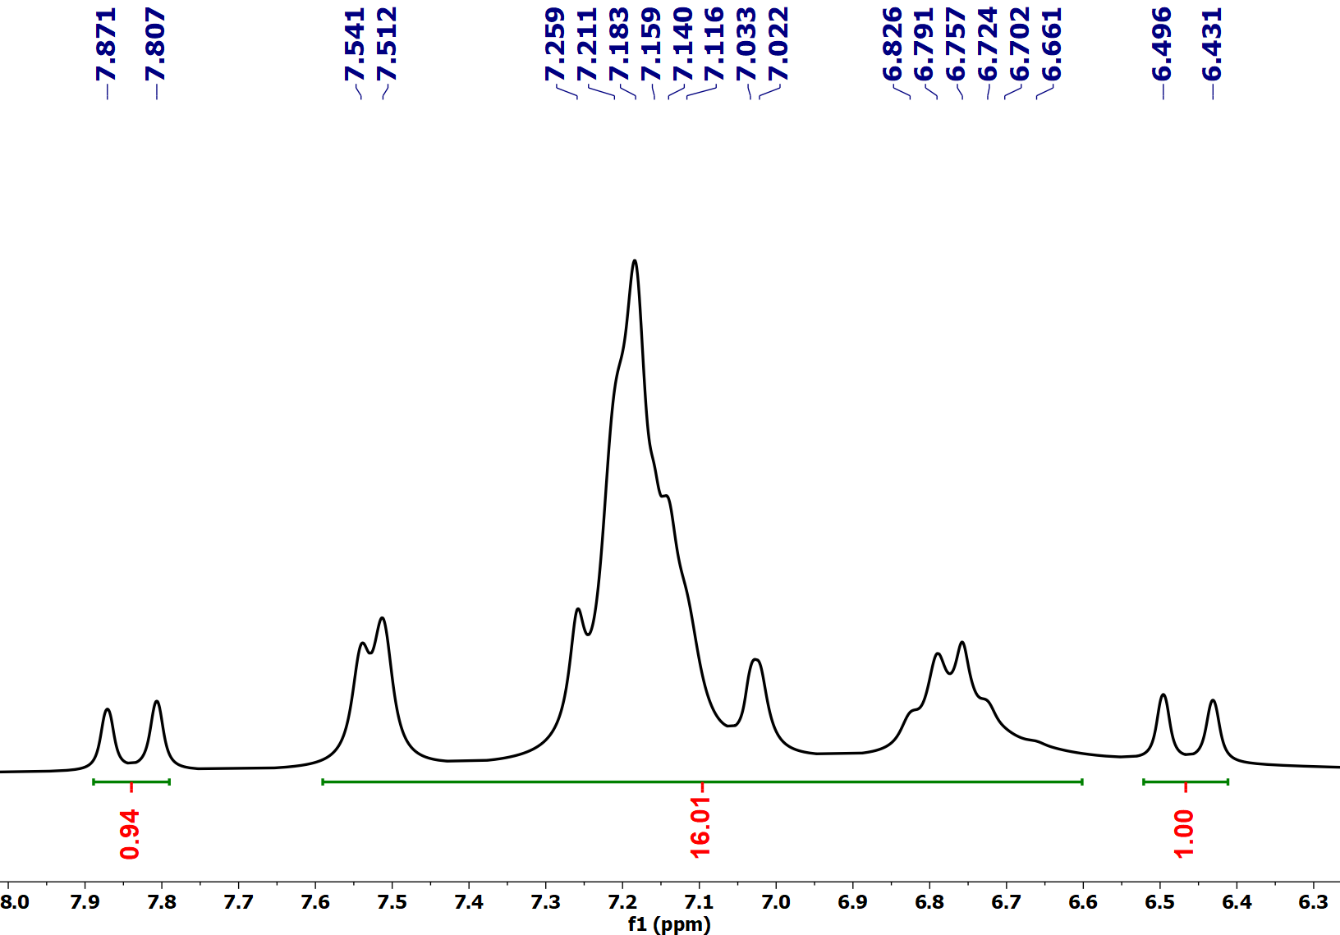
**Figure 44.** Expanded (2) 1H NMR spectrum (250 MHz) of compound **3e** in CDCl3.


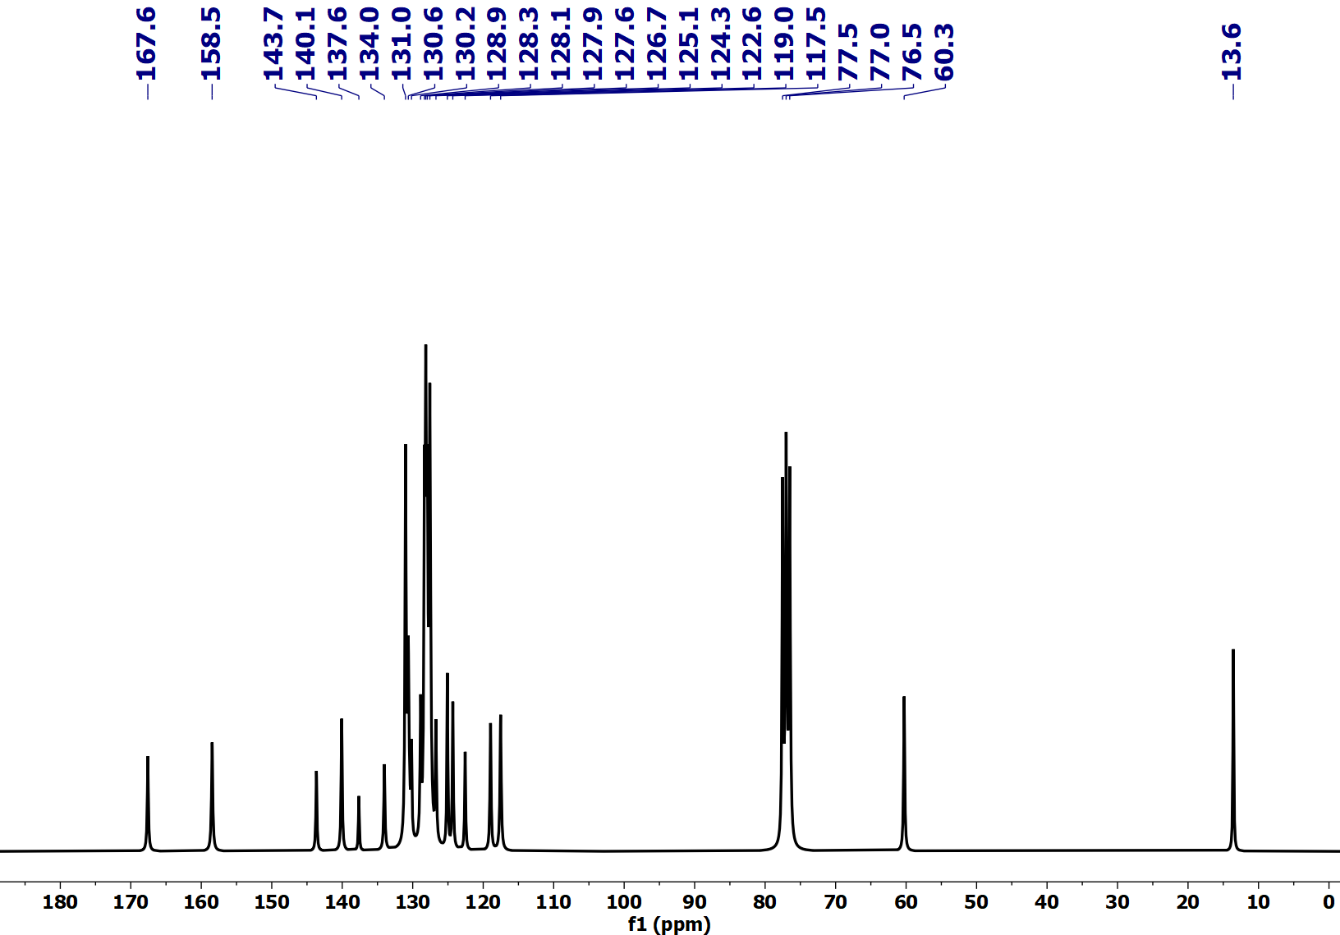
**Figure 45.** 13C NMR spectrum (65 MHz) of compound **3e** in CDCl3.

**(*E*)-Ethyl-3-{2-hydroxy-5-[2-(4-isopropylphenyl)-4,5-diphenyl-1*H*-imidazol-1-yl] phenyl} acrylate (3f)**


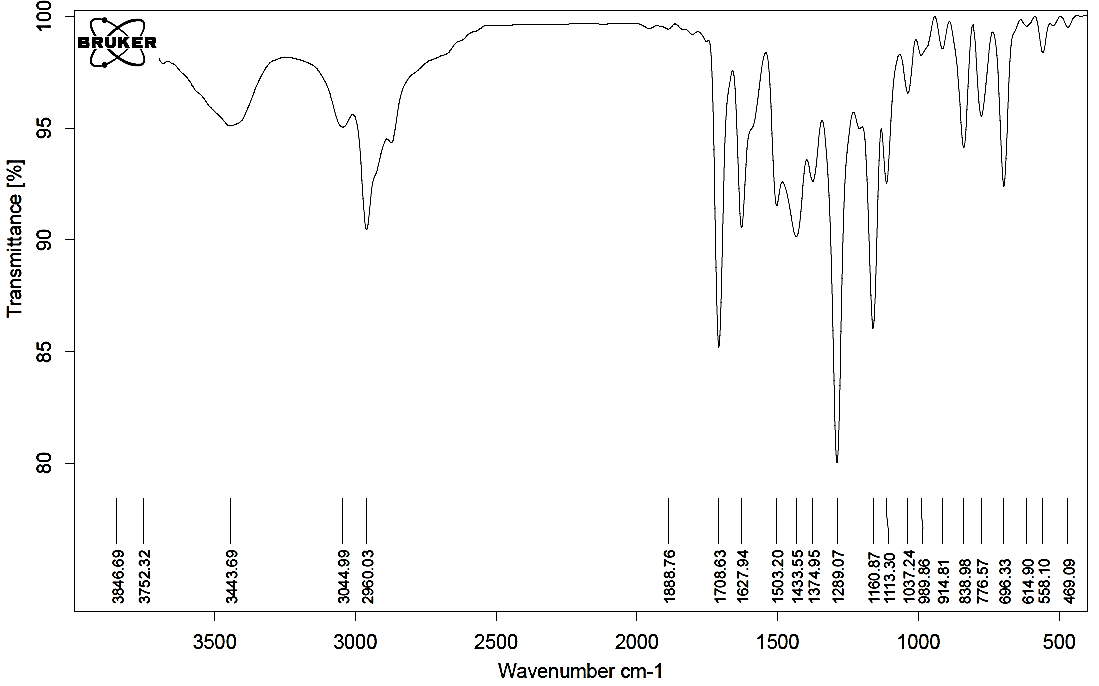
**Figure 46**. FT-IR spectrum of compound **3f.**


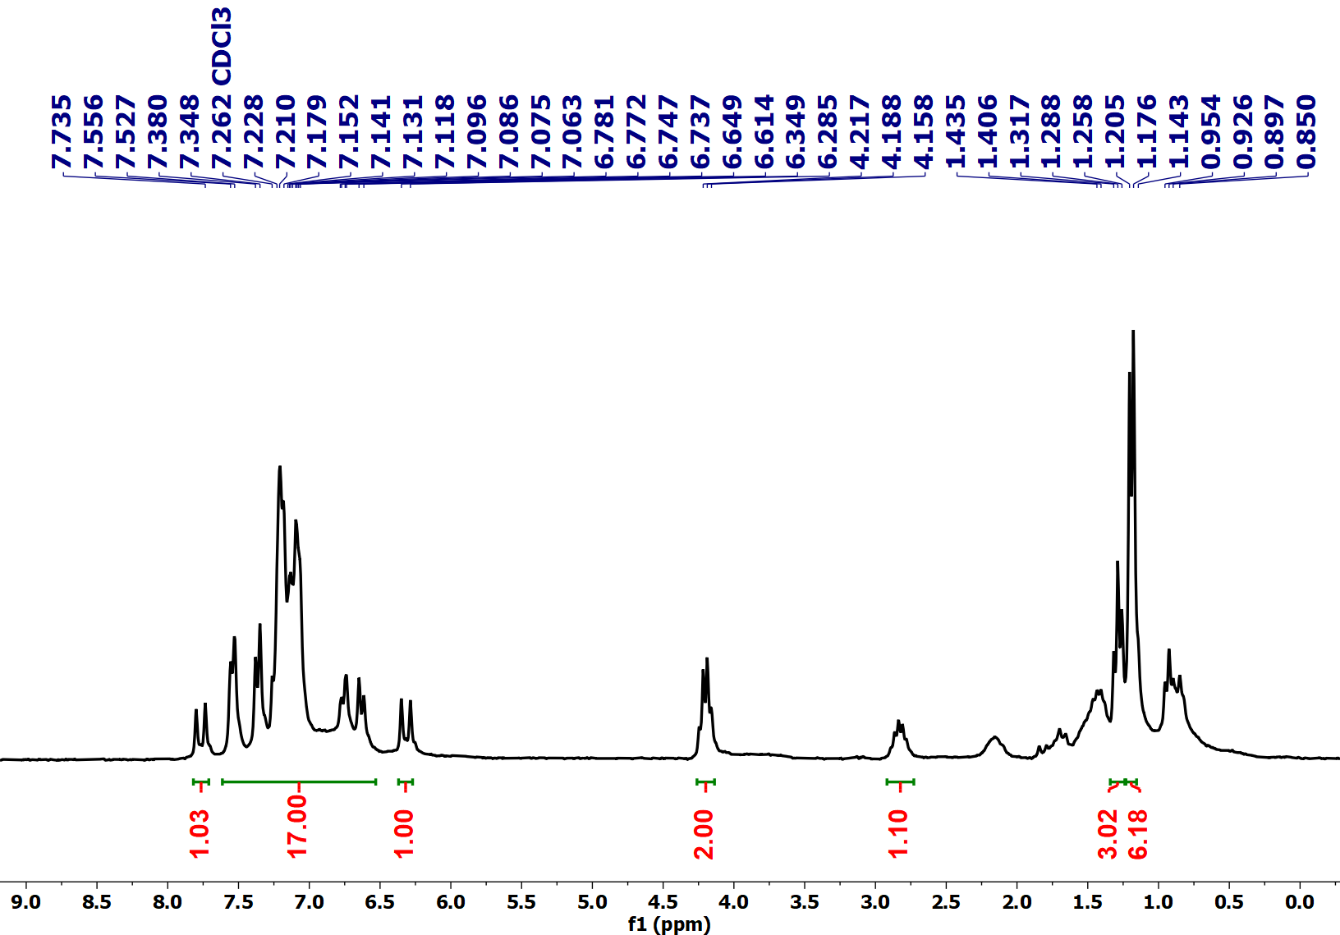
**Figure 47.** 1H NMR spectrum (250 MHz) of compound **3f** in CDCl3.


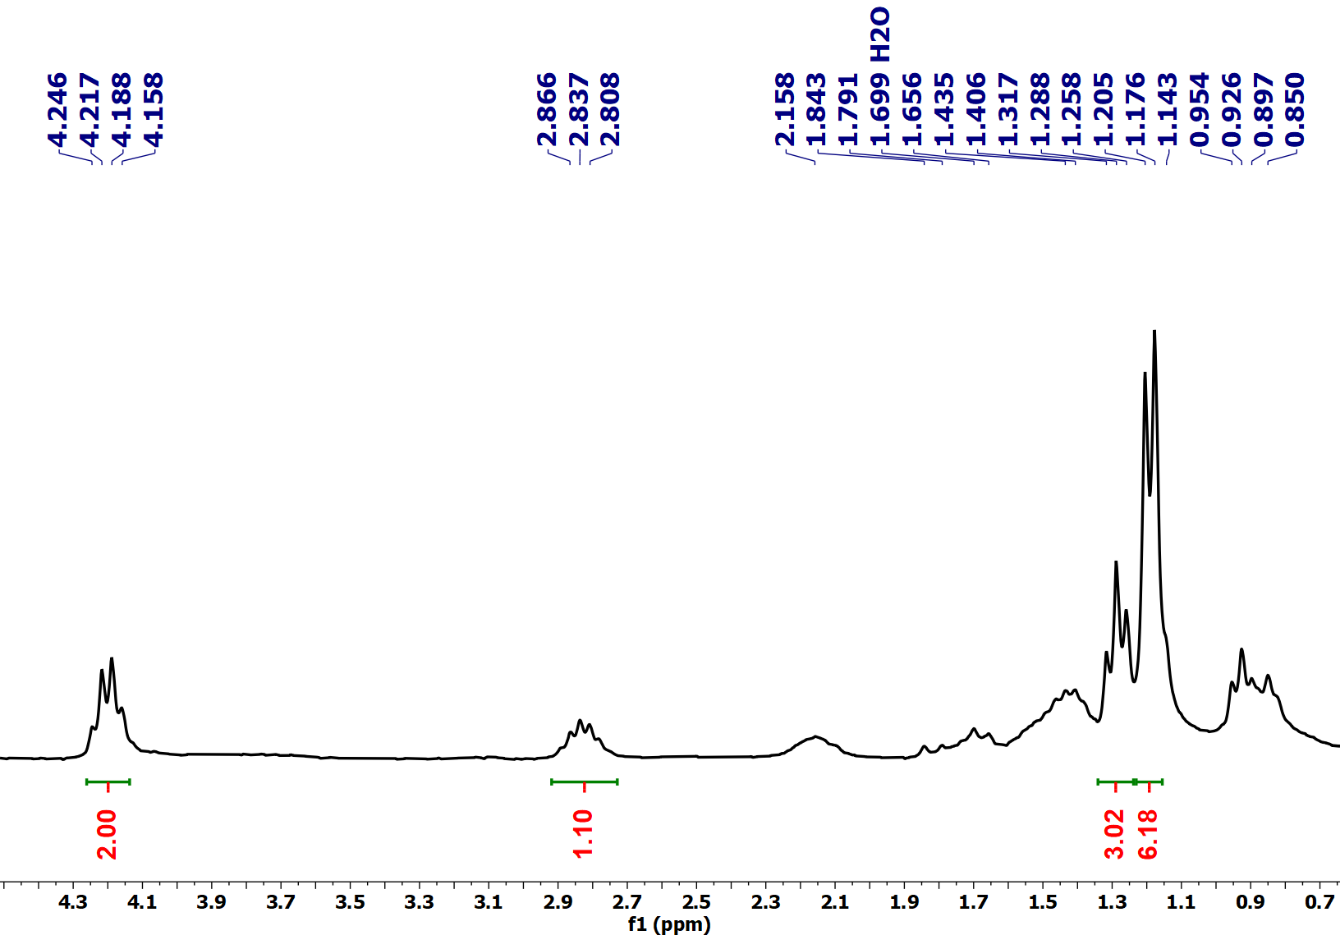
**Figure 48.** Expanded (1) 1H NMR spectrum (250 MHz) of compound **3f** in CDCl3.


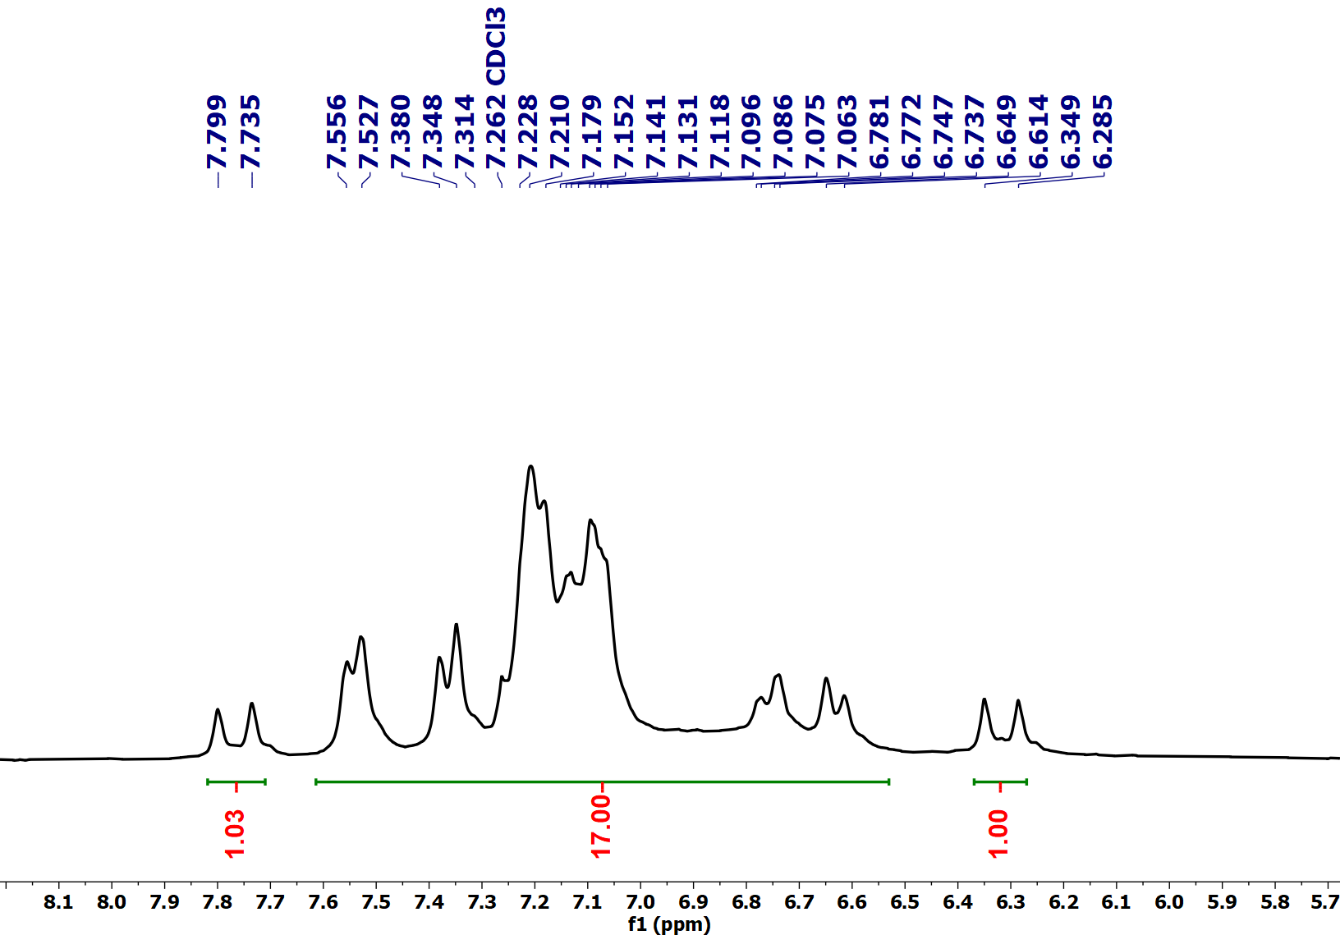
**Figure 49.** Expanded (1) 1H NMR spectrum (250 MHz) of compound **3f** in CDCl3.


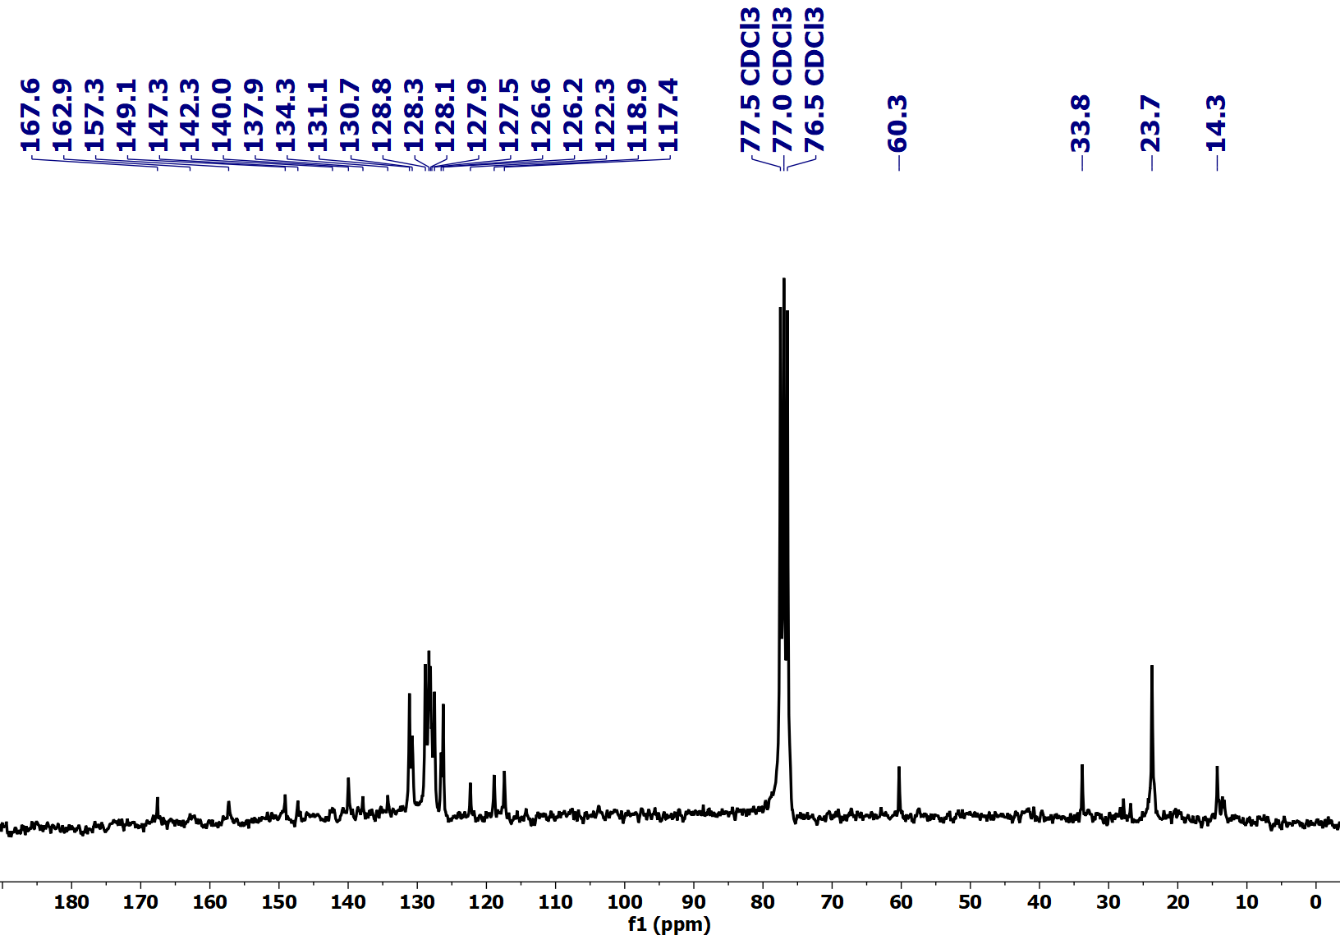
**Figure 50.** 13C NMR spectrum (65 MHz) of compound **3f** in CDCl3.

**(*E*)-Ethyl -3-{5-[2-(4-chlorophenyl)-4,5-diphenyl-1*H*-imidazol-1-yl]-2-hydroxy phenyl}acrylate (3g)**

**
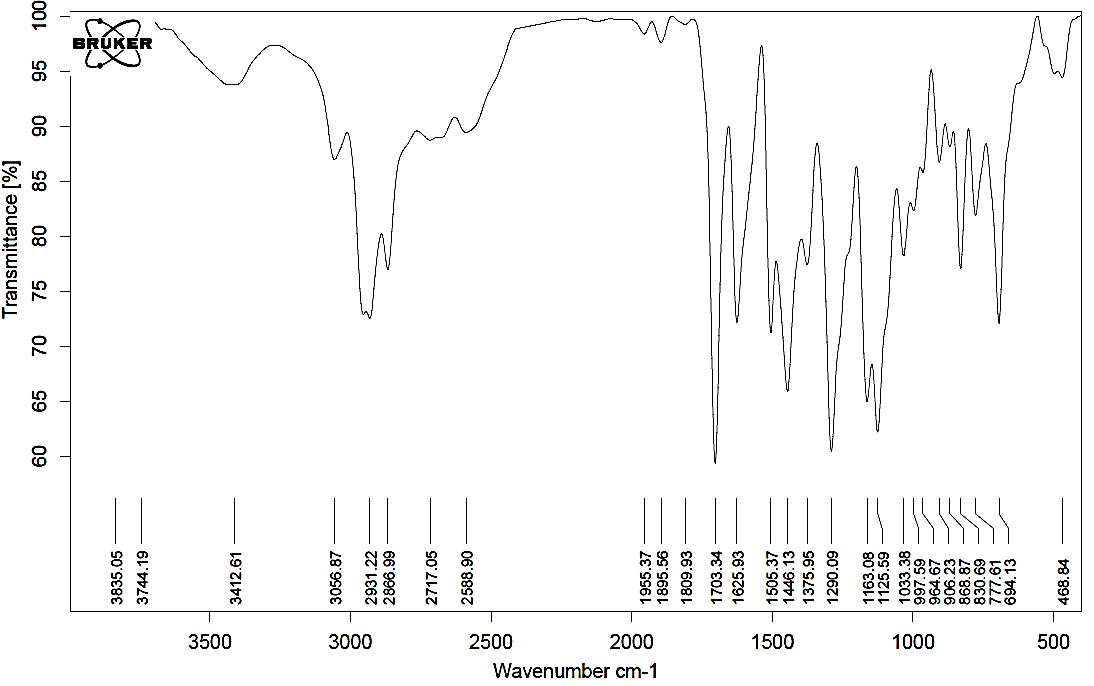
Figure 51**. FT-IR spectrum of compound **3g.**


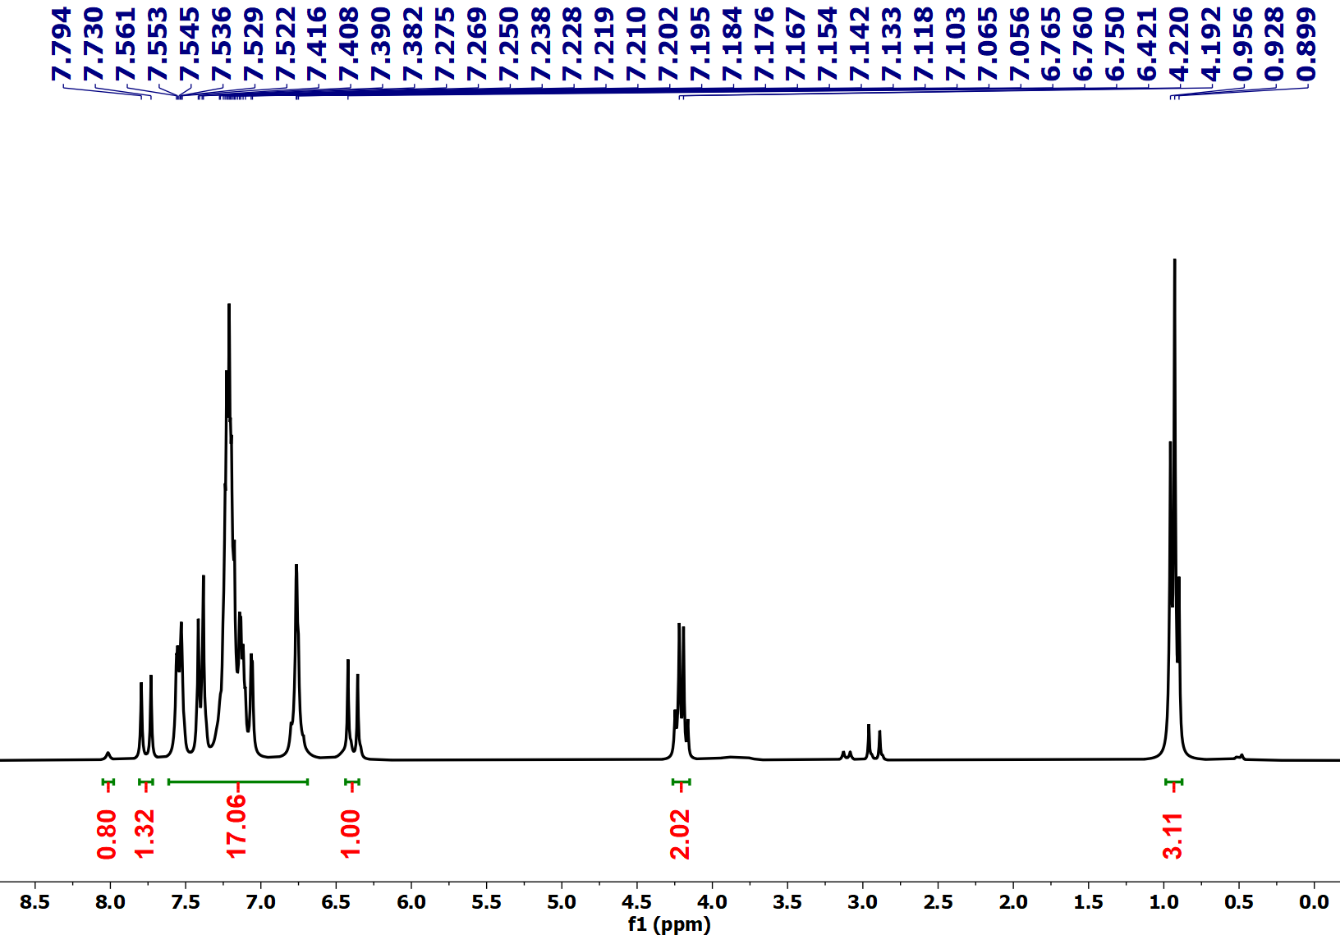
**Figure 52.** 1H NMR spectrum (250 MHz) of compound **3g** in CDCl3.


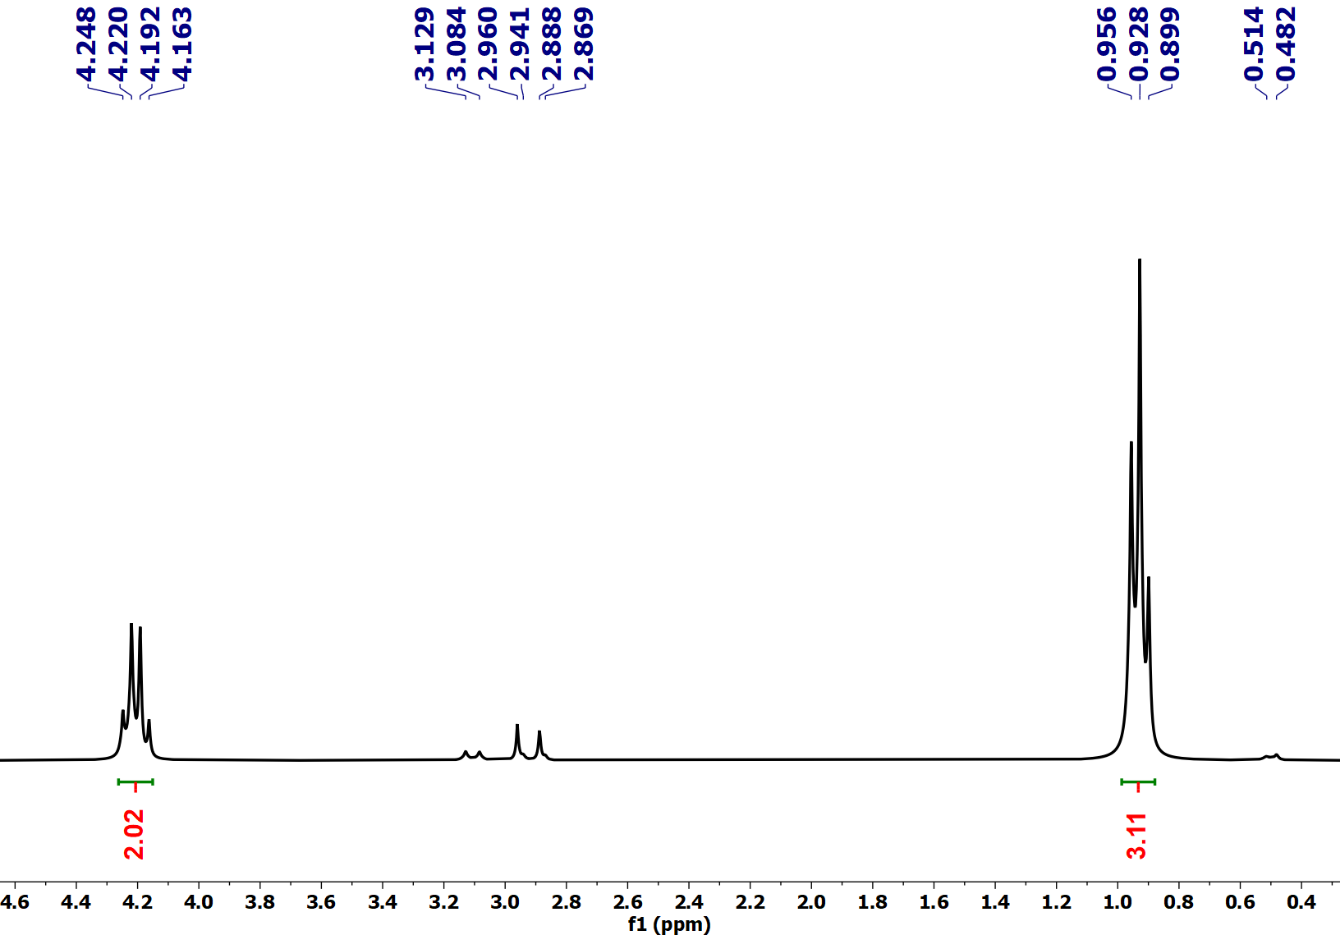
**Figure 53.** Expanded (1) 1H NMR spectrum (250 MHz) of compound **3g** in CDCl3.


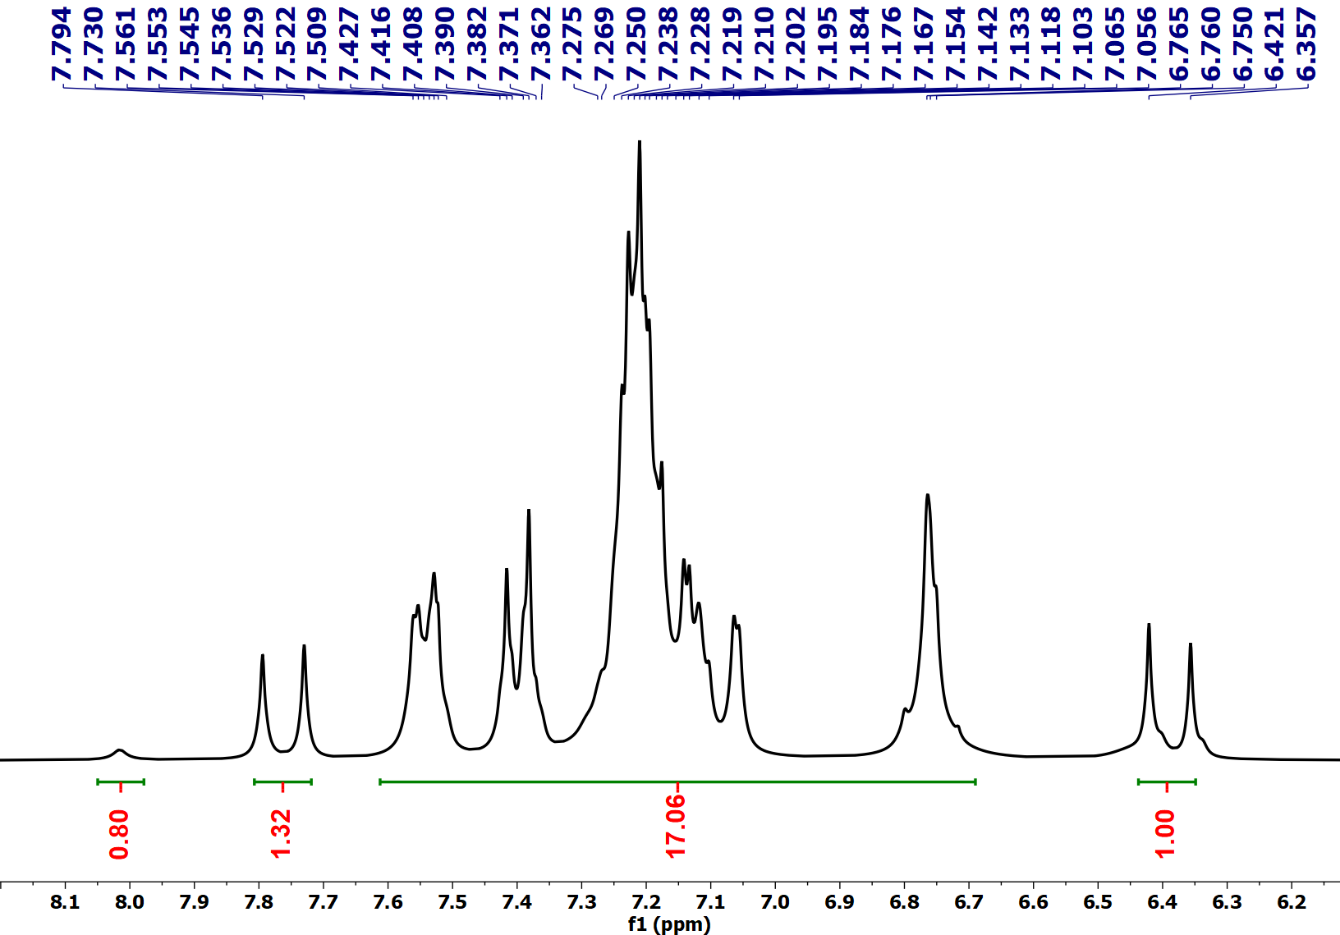
**Figure 54.** Expanded (2) 1H NMR spectrum (250 MHz) of compound **3g** in CDCl3.


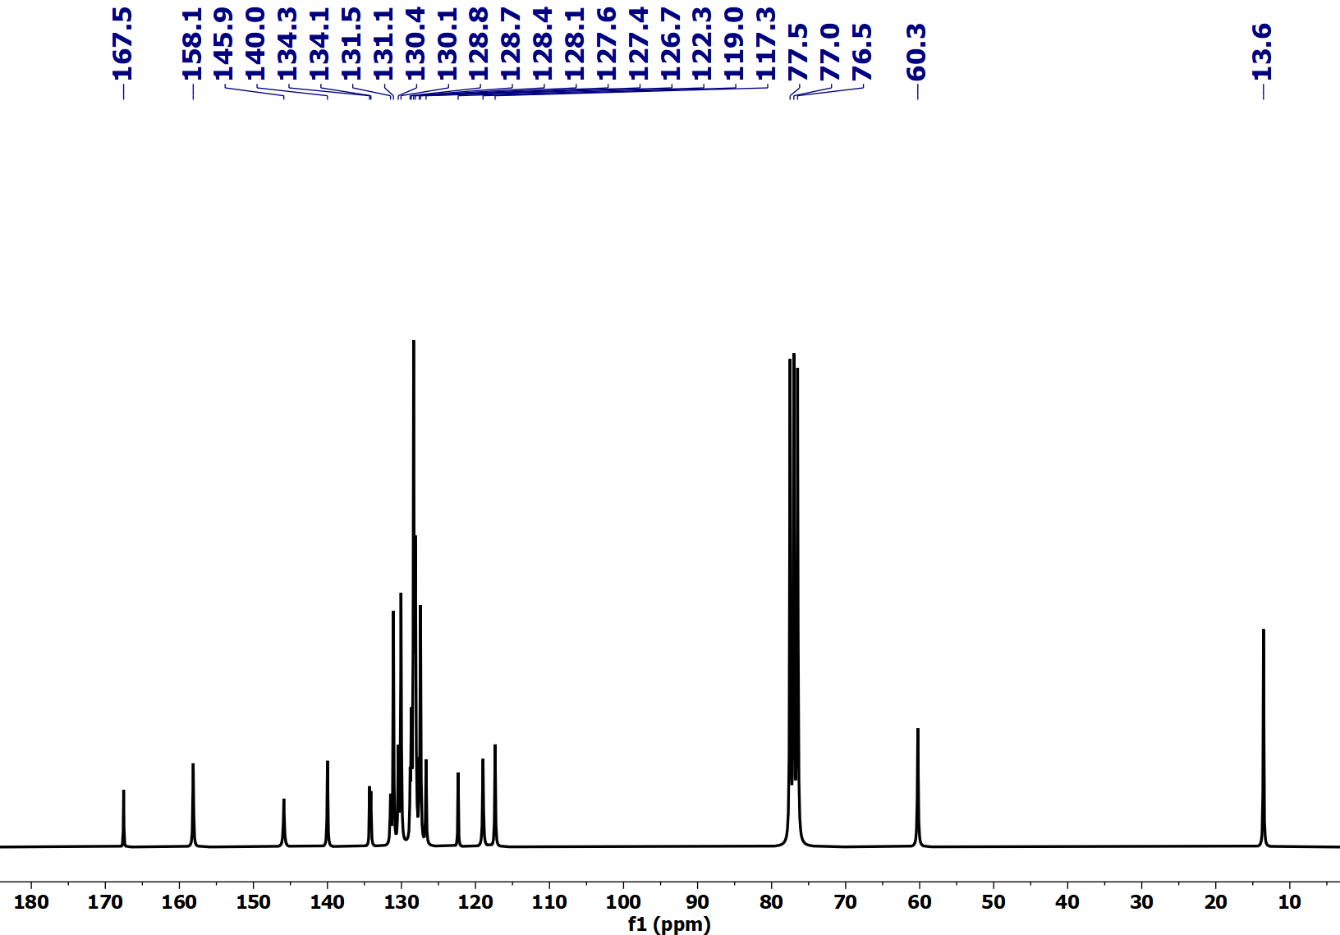
**Figure 55.** 13C NMR spectrum (65 MHz) of compound **3g** in CDCl3.

**(*E*)-ethyl-3-{5-[4,5-diphenyl-1-(*p*-tolyl)-1*H*-imidazol-2-yl]-2-hydroxyphenyl} acrylate (3h):**


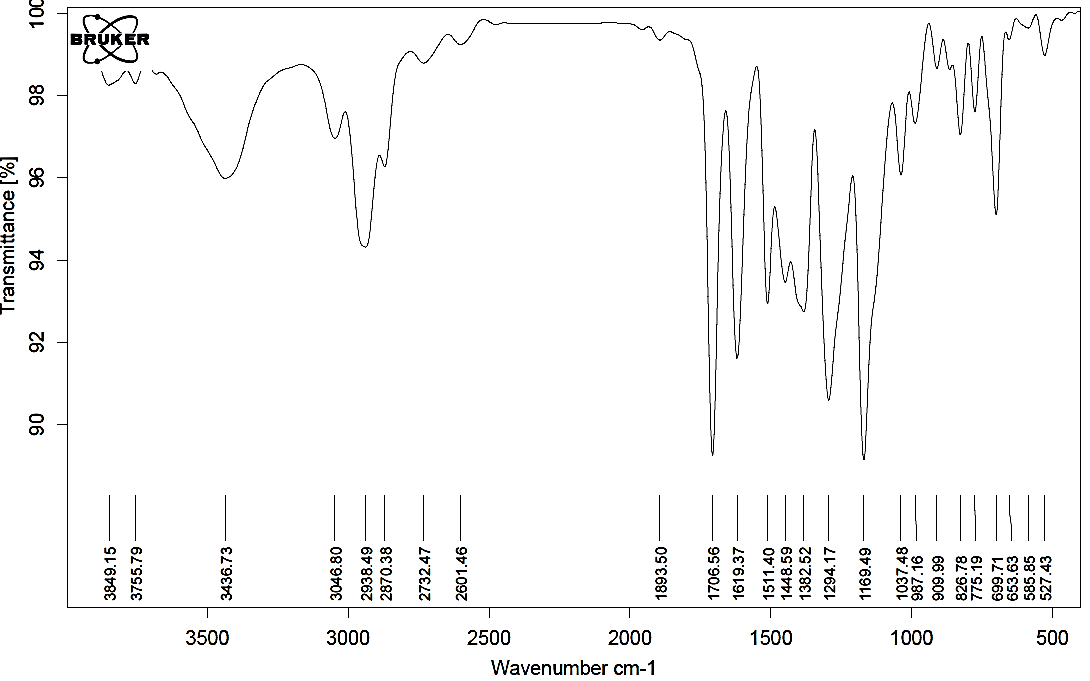
**Figure 56**. FT-IR spectrum of compound **3h.**


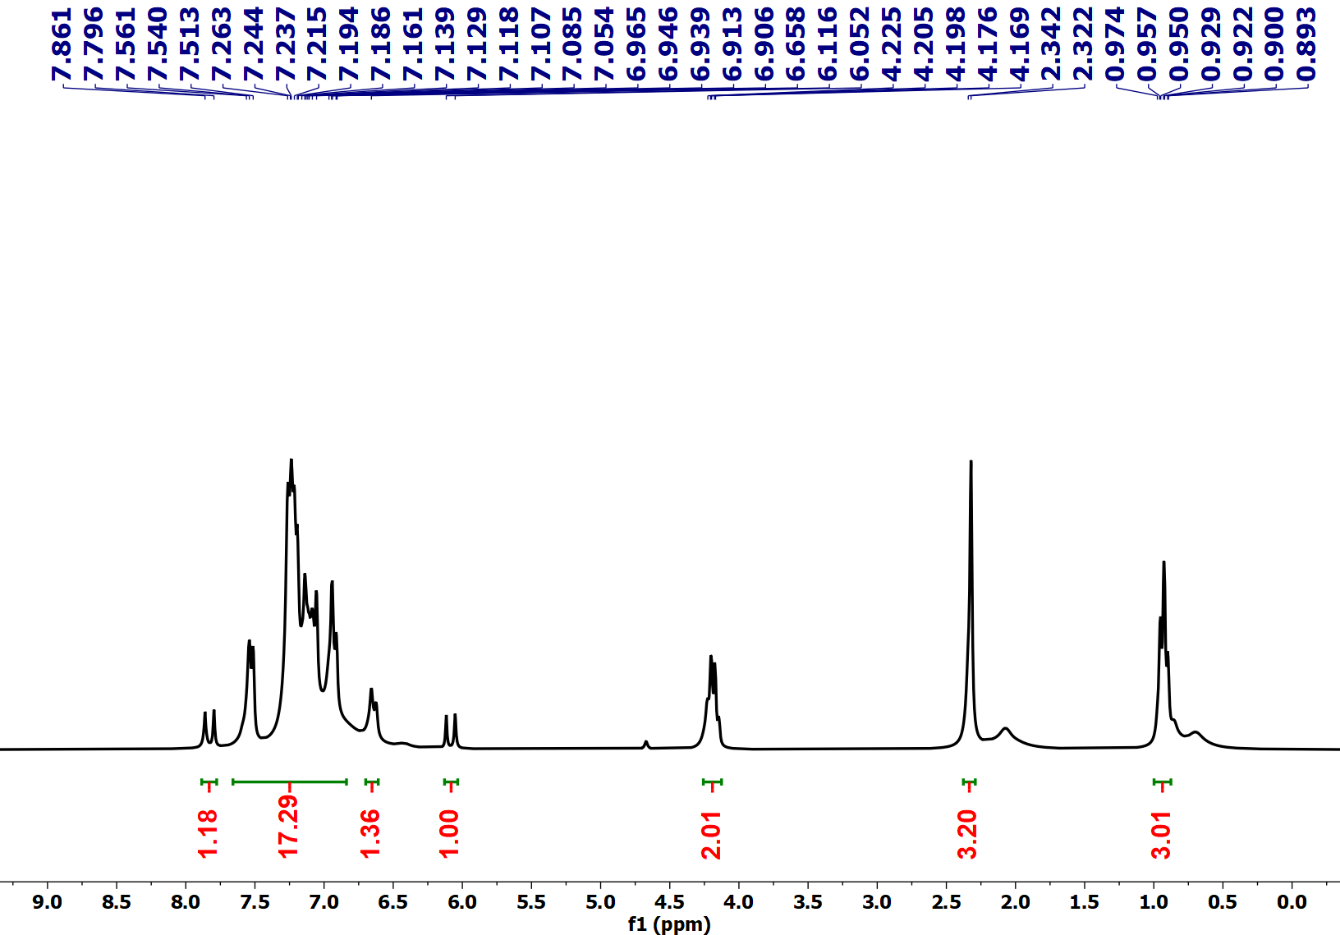
**Figure 57.** 1H NMR spectrum (250 MHz) of compound **3h** in CDCl3.


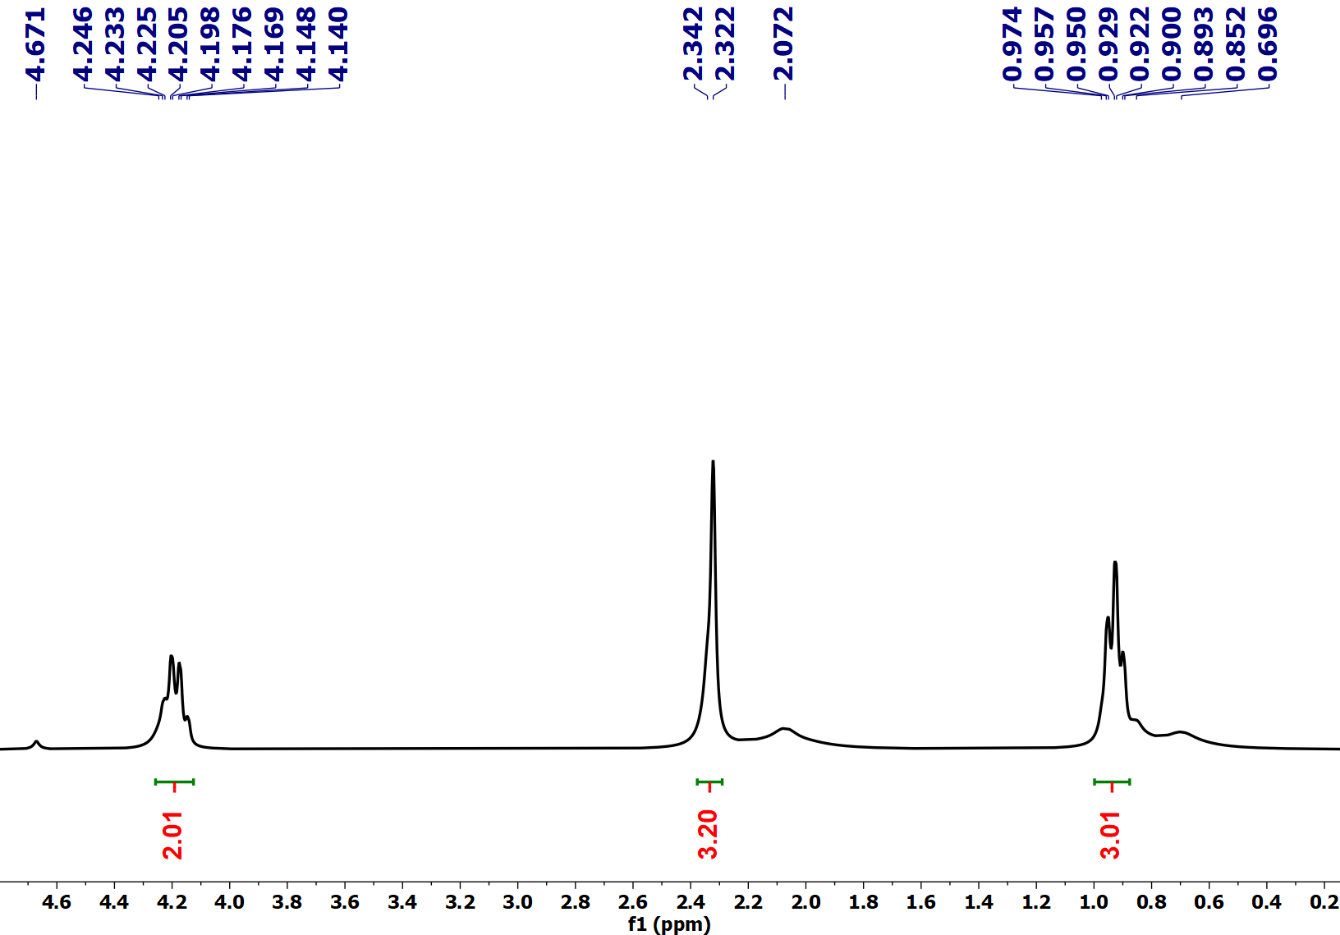
**Figure 58.** Expanded (1) 1H NMR spectrum (250 MHz) of compound **3h** in CDCl3.


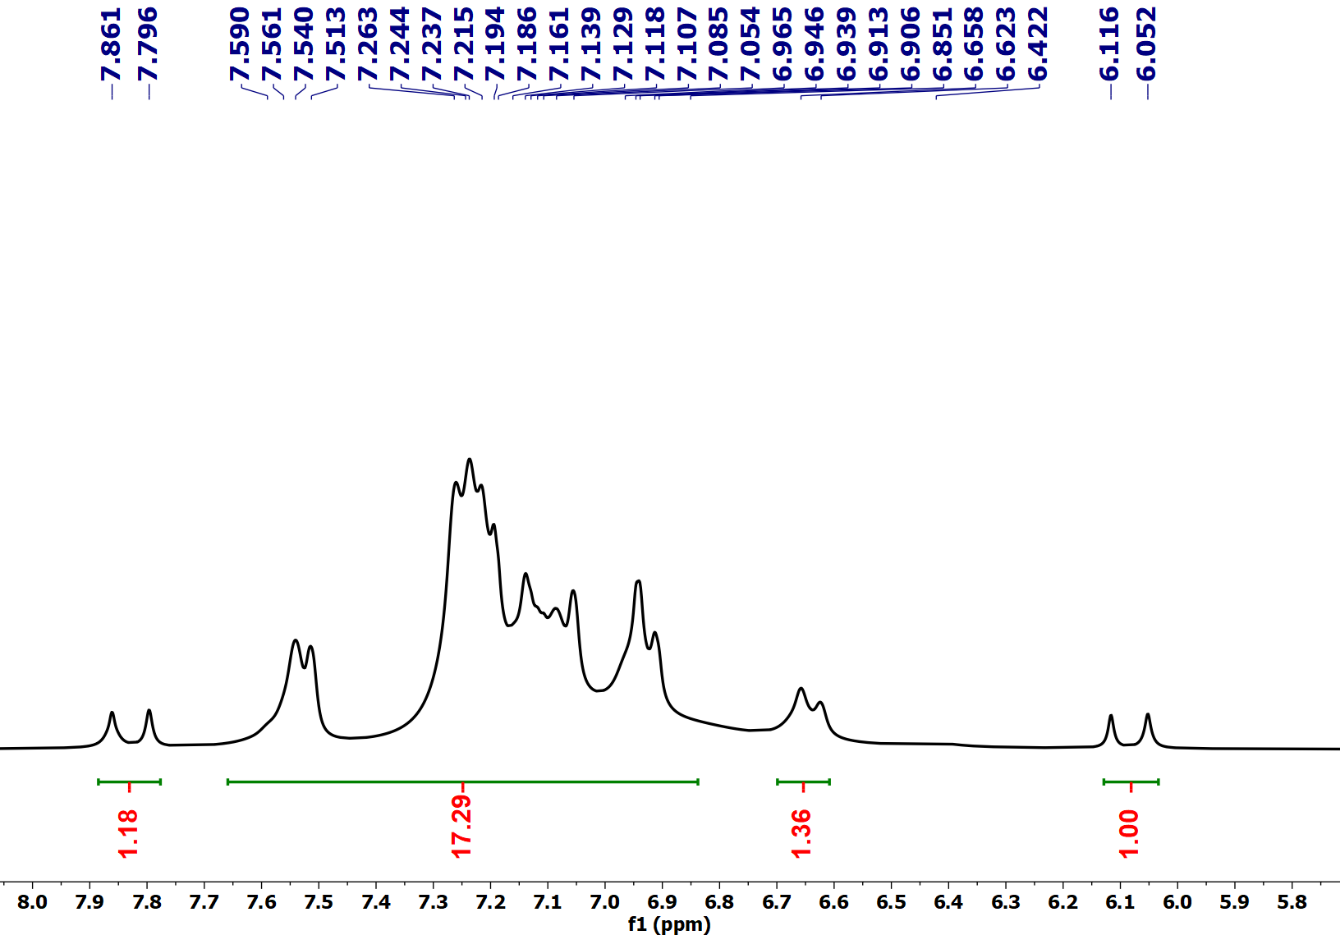
**Figure 59.** Expanded (2) 1H NMR spectrum (250 MHz) of compound **3h** in CDCl3.


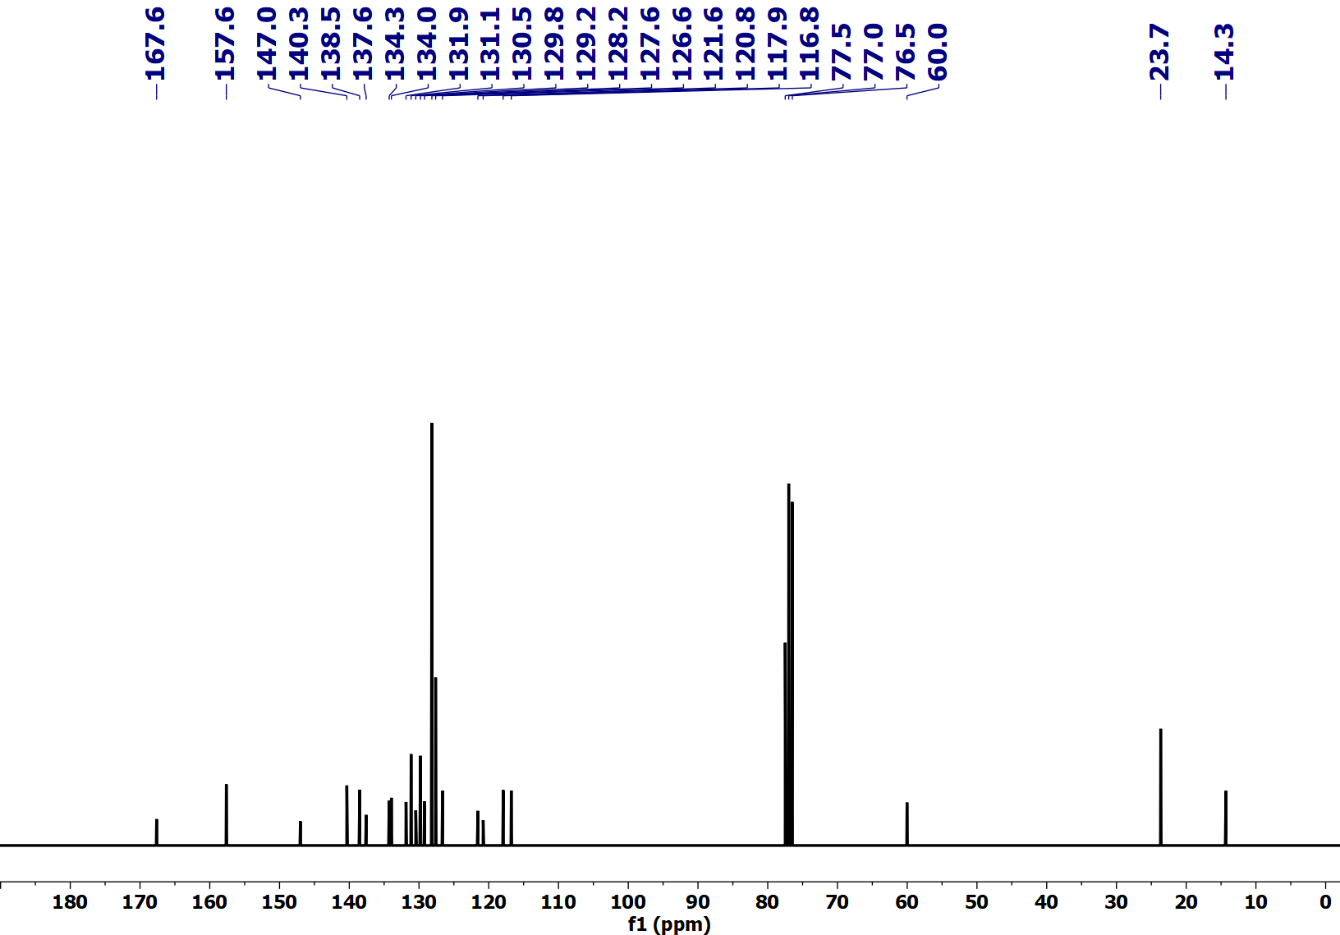
**Figure 60.** 13C NMR spectrum (65 MHz) of compound **3h** in CDCl3.

**(*E*)-Ethyl -3-[2-(2-ethoxy-2-oxoethoxy)-5-(2,4,5-triphenyl-1*H*-imidazol-1-yl)phenyl] acrylate (4a)**


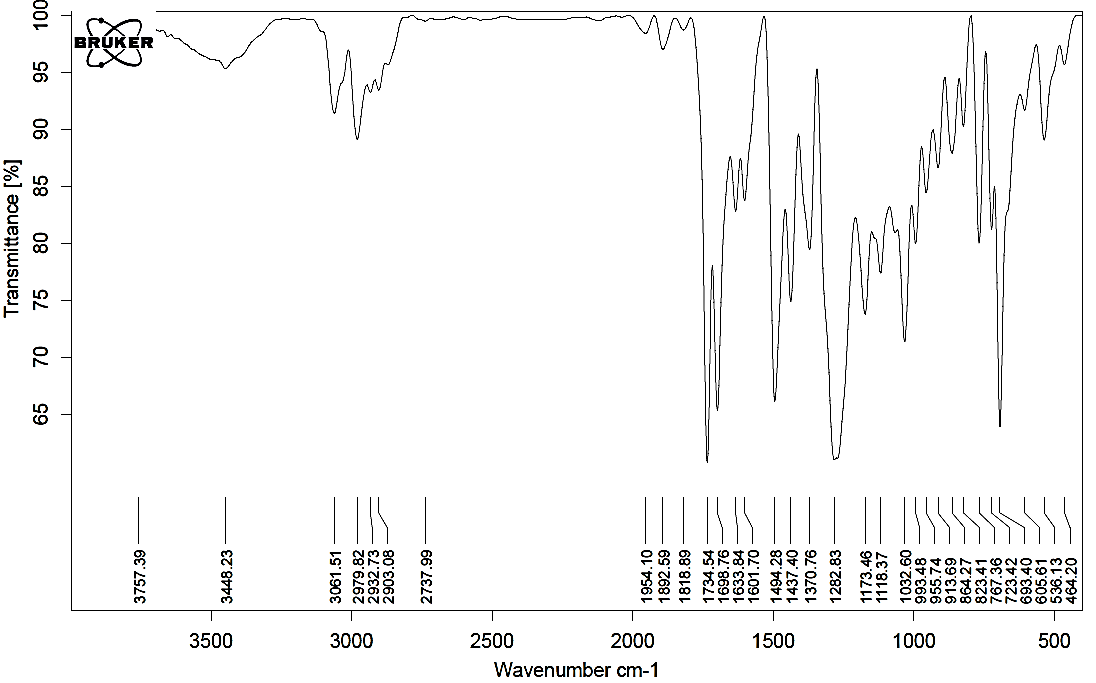
**Figure 61**. FT-IR spectrum of compound **4a.**


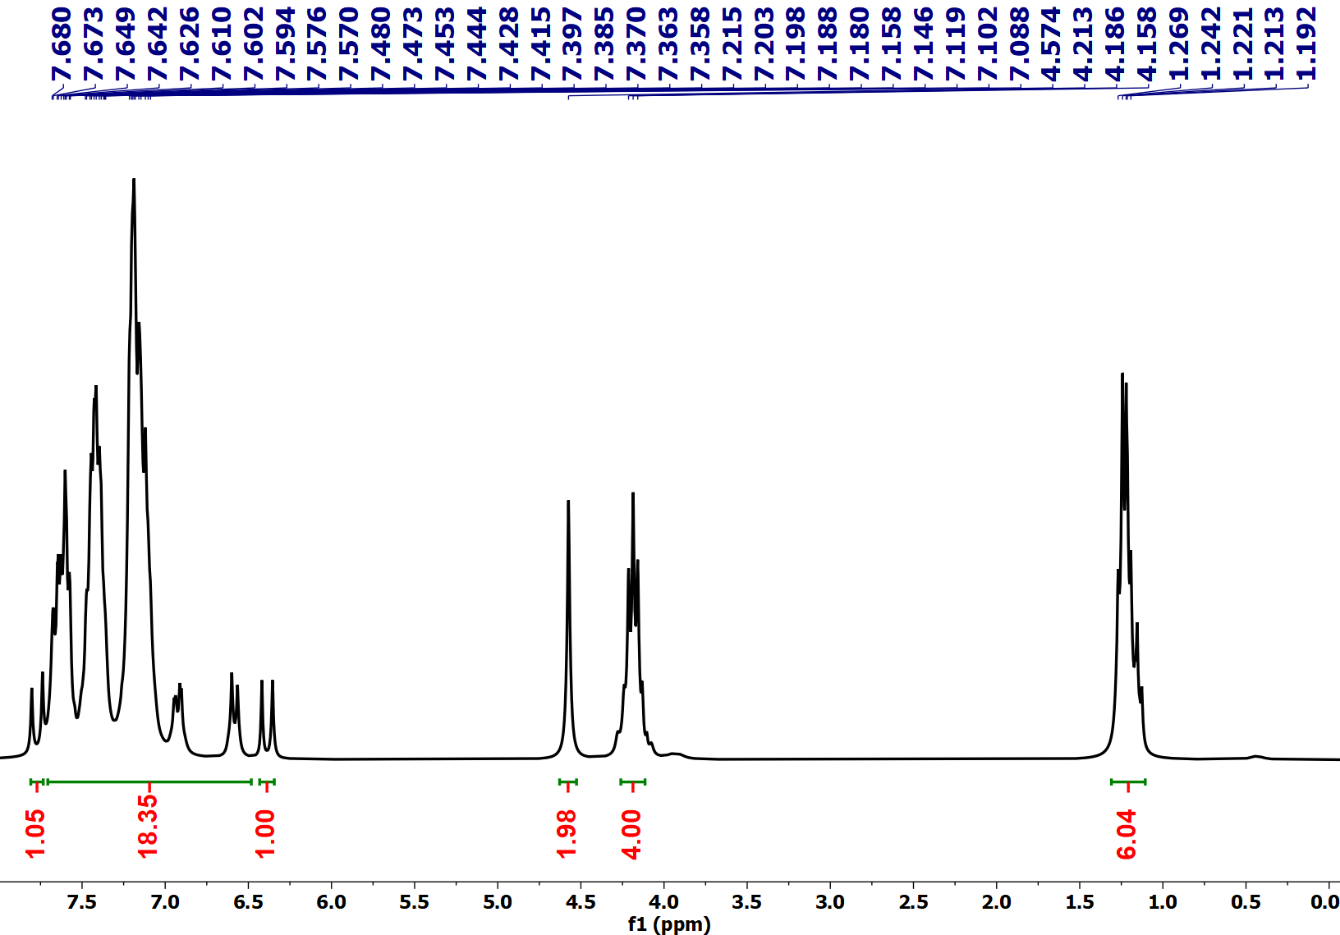
**Figure 62.** 1H NMR spectrum (250 MHz) of compound **4a** in CDCl3.


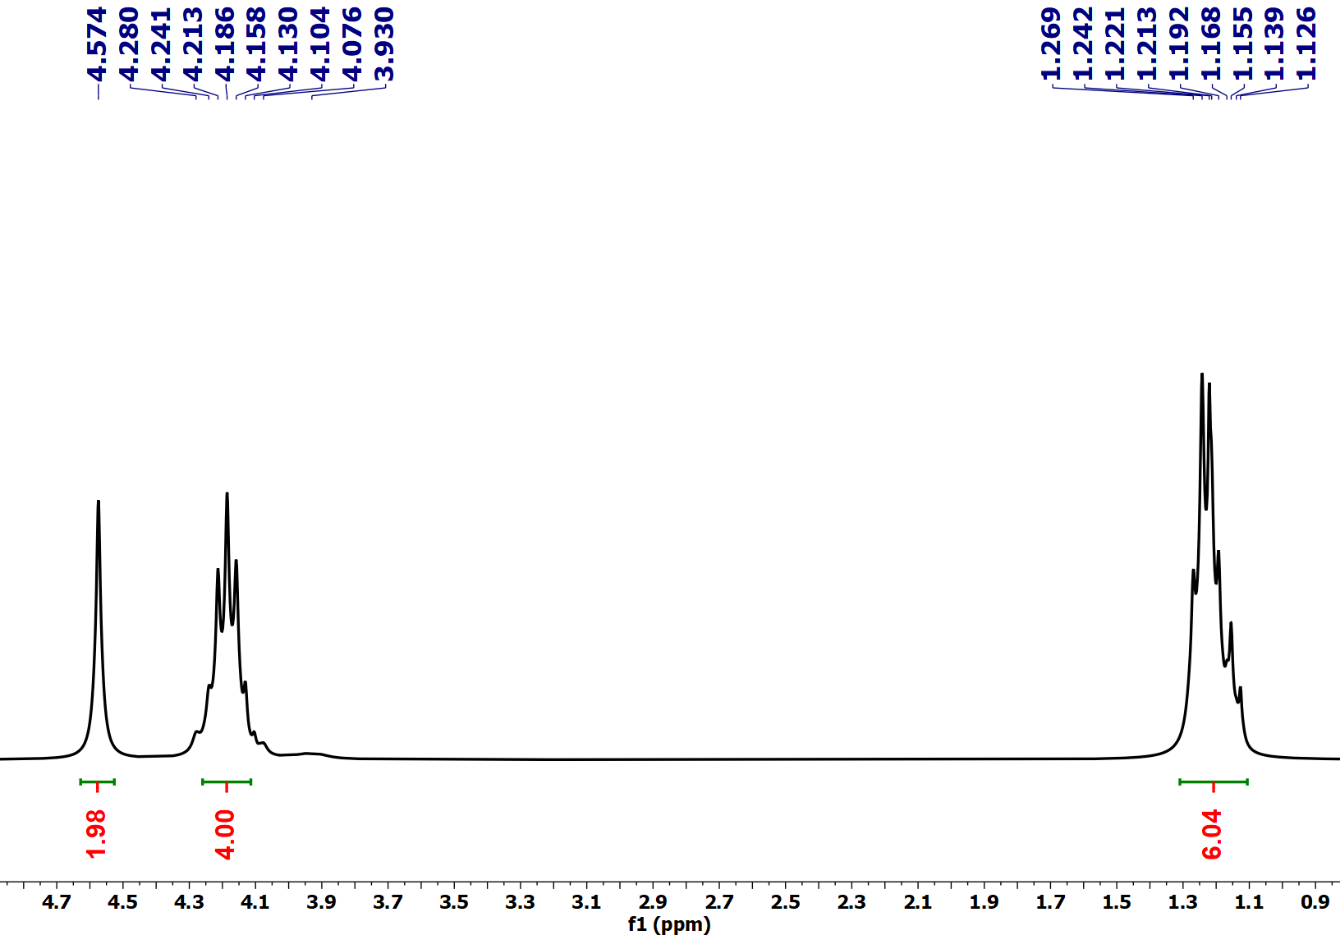
**Figure 63.** Expanded (1) 1H NMR spectrum (250 MHz) of compound **4a** in CDCl3.


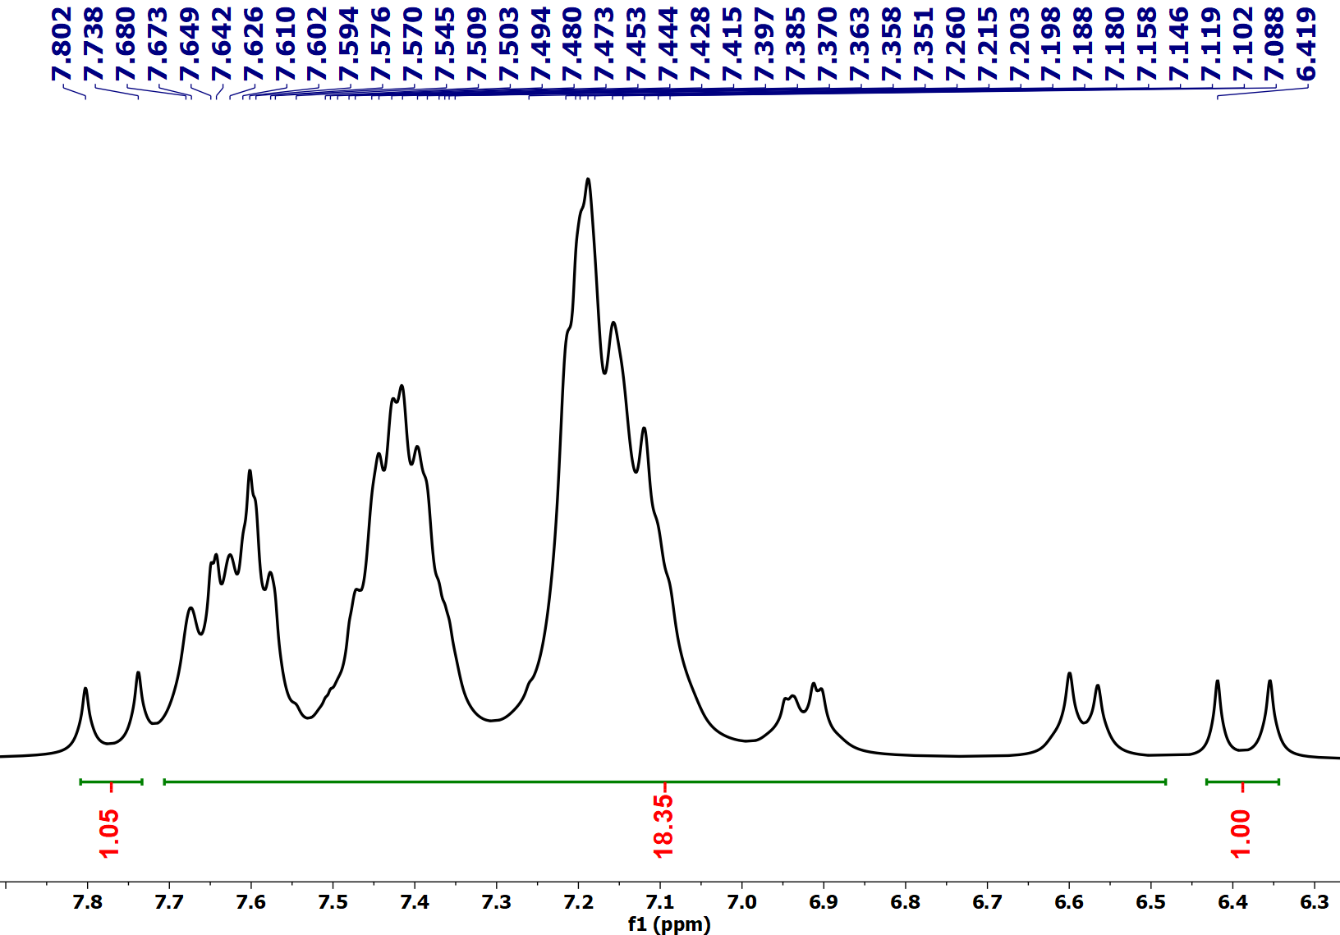
**Figure 64.** Expanded (2) 1H NMR spectrum (250 MHz) of compound **4a** in CDCl3.


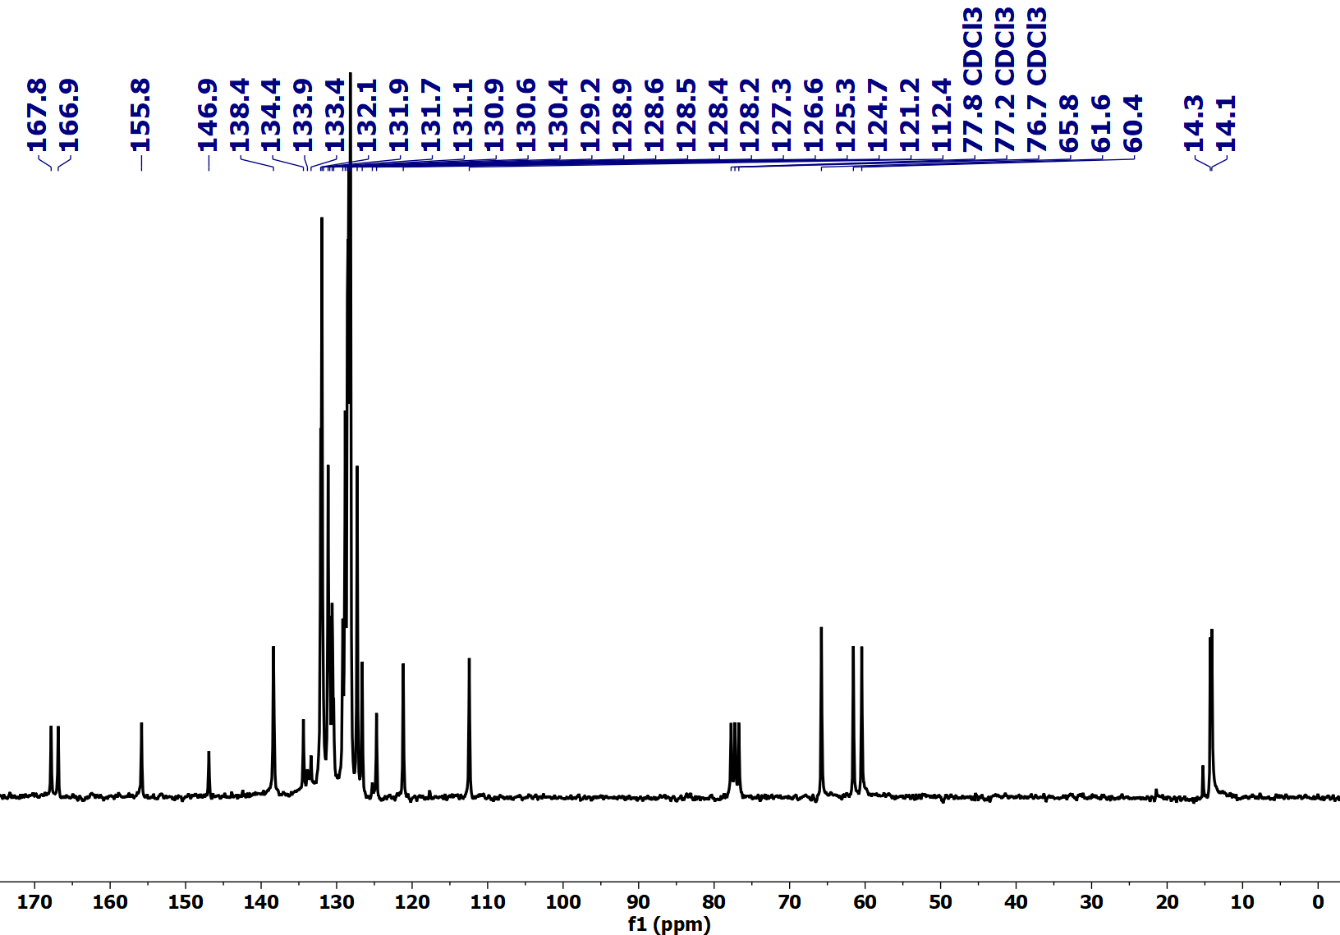
**Figure 65.** 13C NMR spectrum (65 MHz) of compound **4a** in CDCl3.

**(*E*)-ethyl -3-{5-[4,5-diphenyl-2-(*p*-tolyl)-1*H*- imidazol -1-yl] -2- [2-ethoxy-2-oxoethoxy] phenyl}acrylate (4b)**


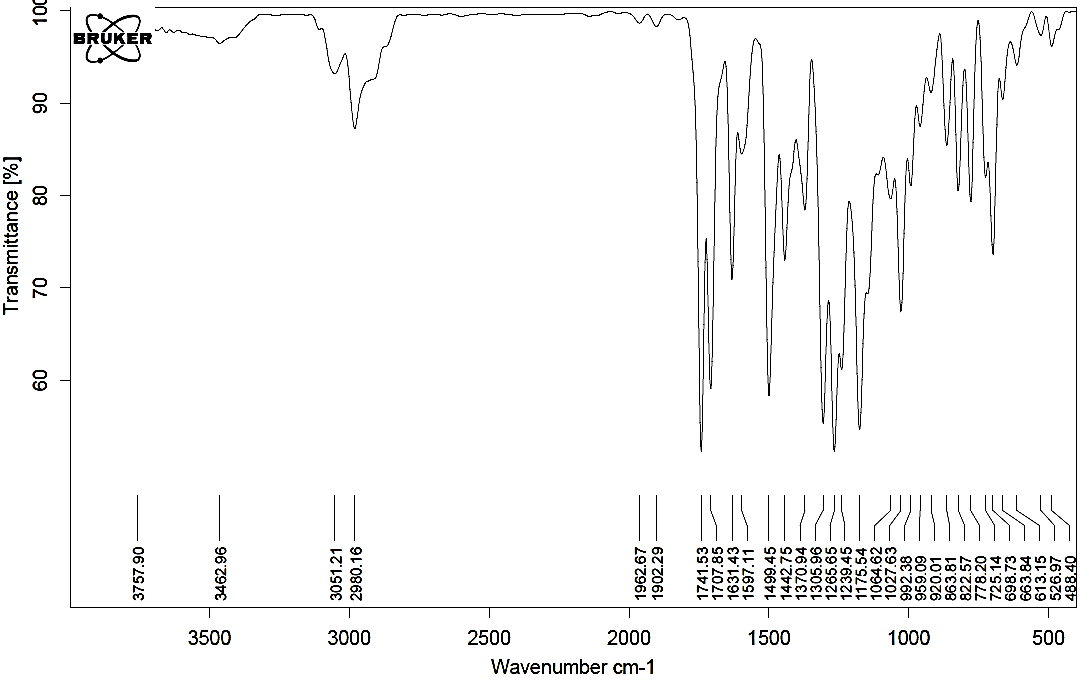
**Figure 66**. FT-IR spectrum of compound **4b.**


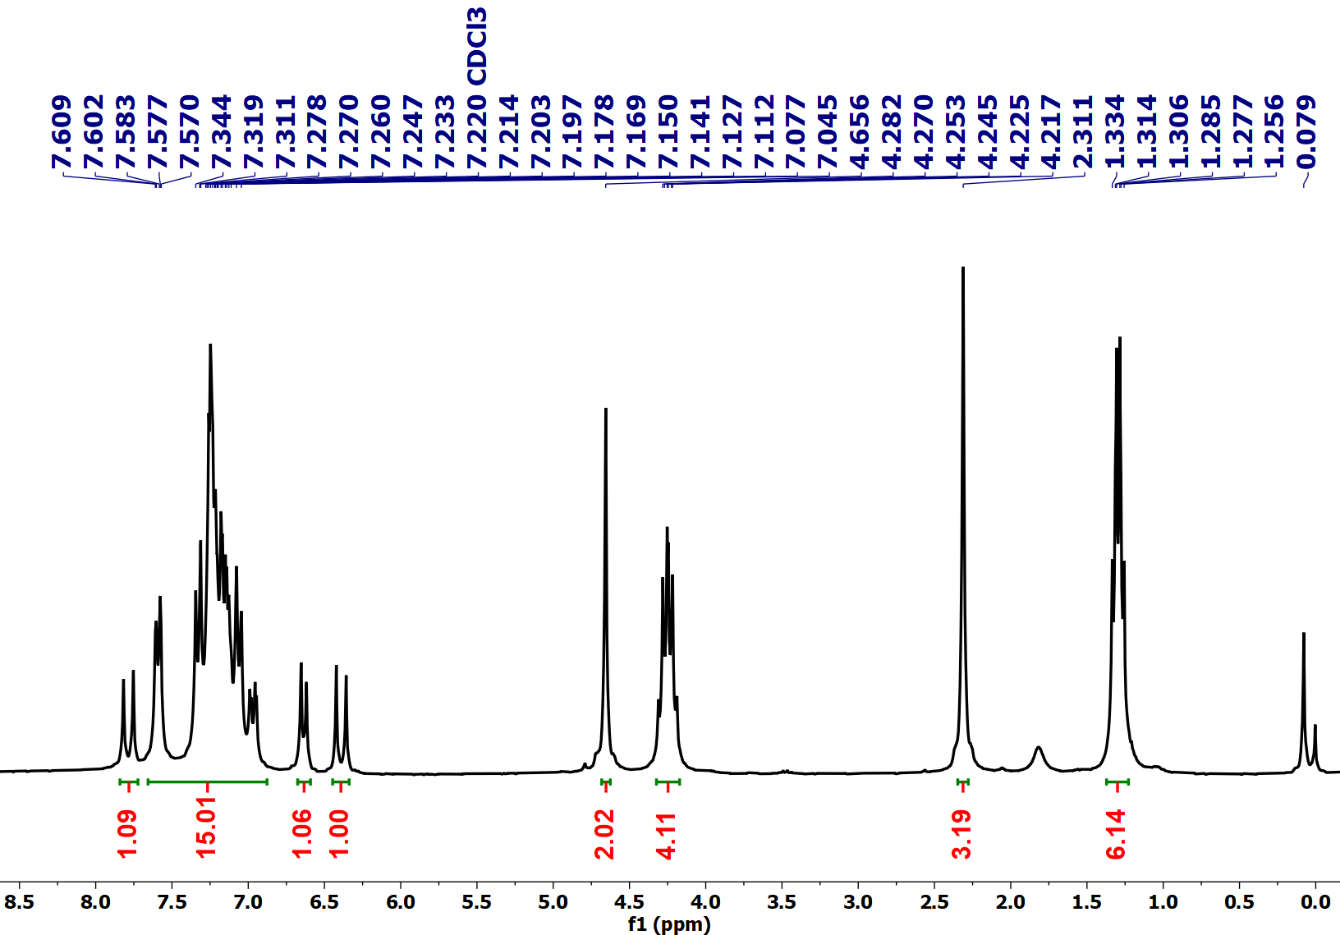
**Figure 67.** 1H NMR spectrum (250 MHz) of compound **4b** in CDCl3.


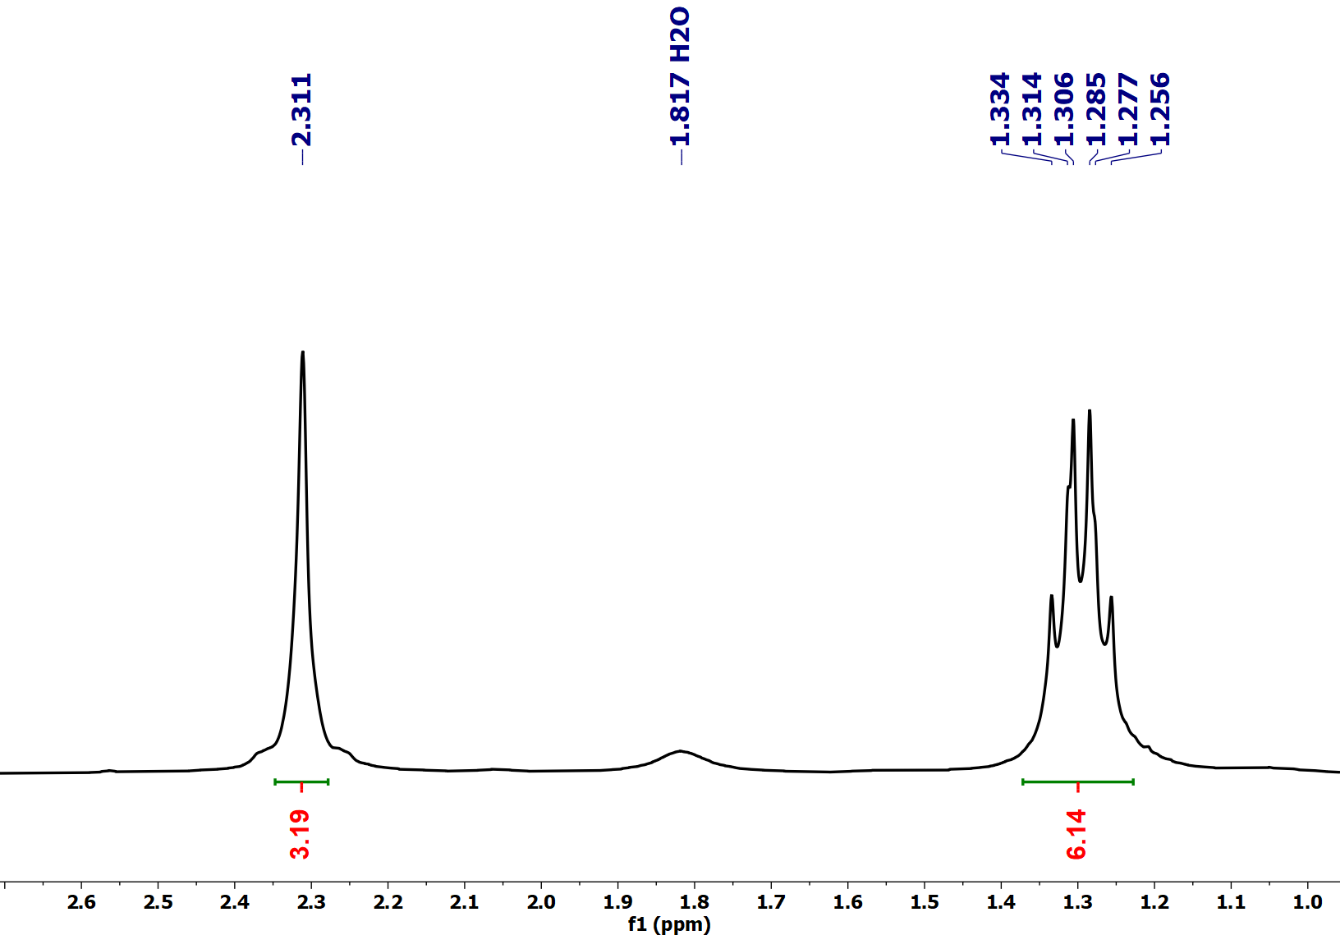
**Figure 68.** Expanded (1) 1H NMR spectrum (250 MHz) of compound **4b** in CDCl3.


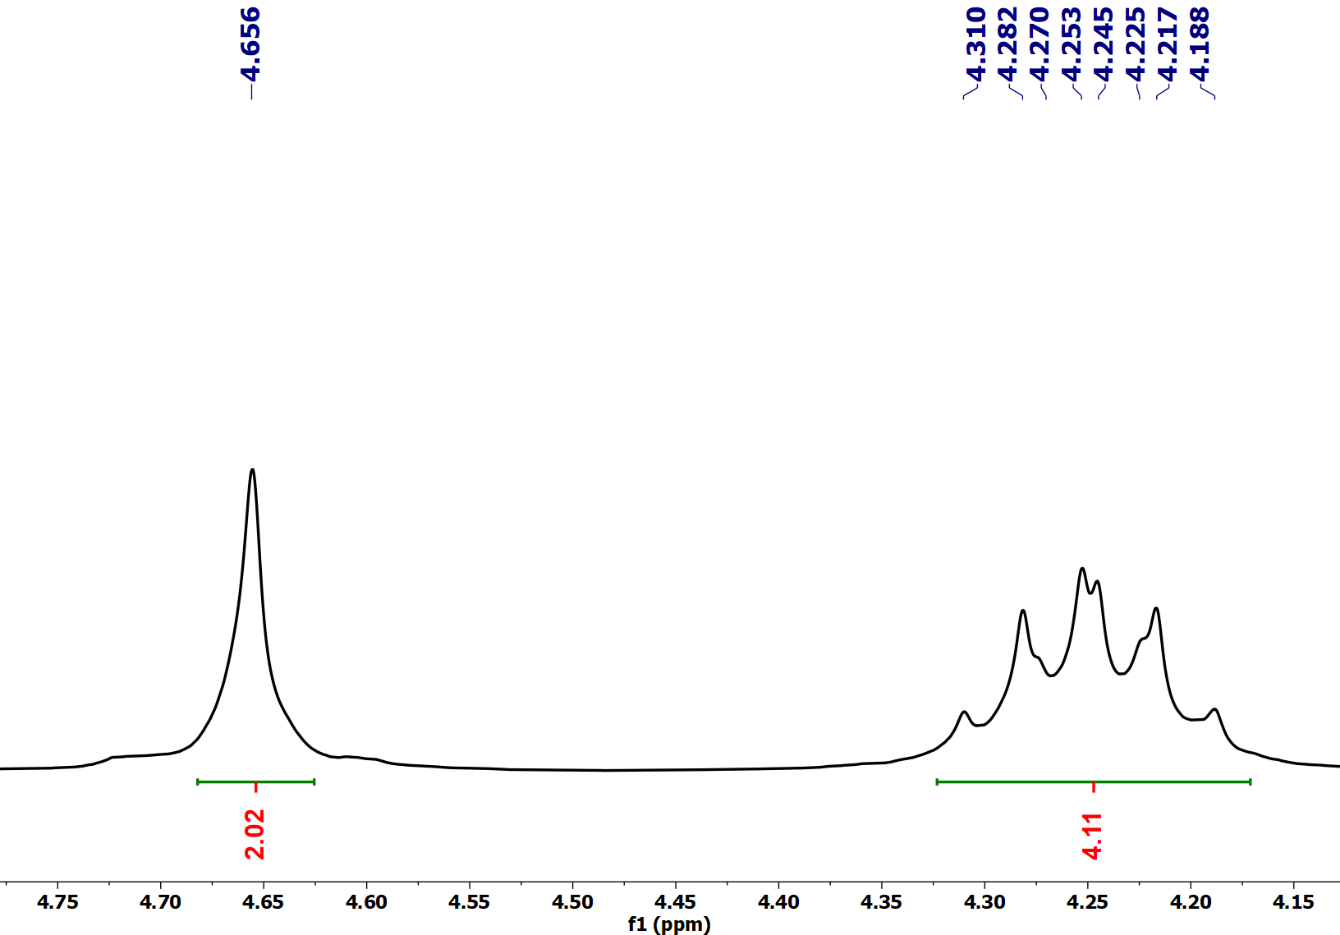
**Figure 69.** Expanded (2) 1H NMR spectrum (250 MHz) of compound **4b** in CDCl3.


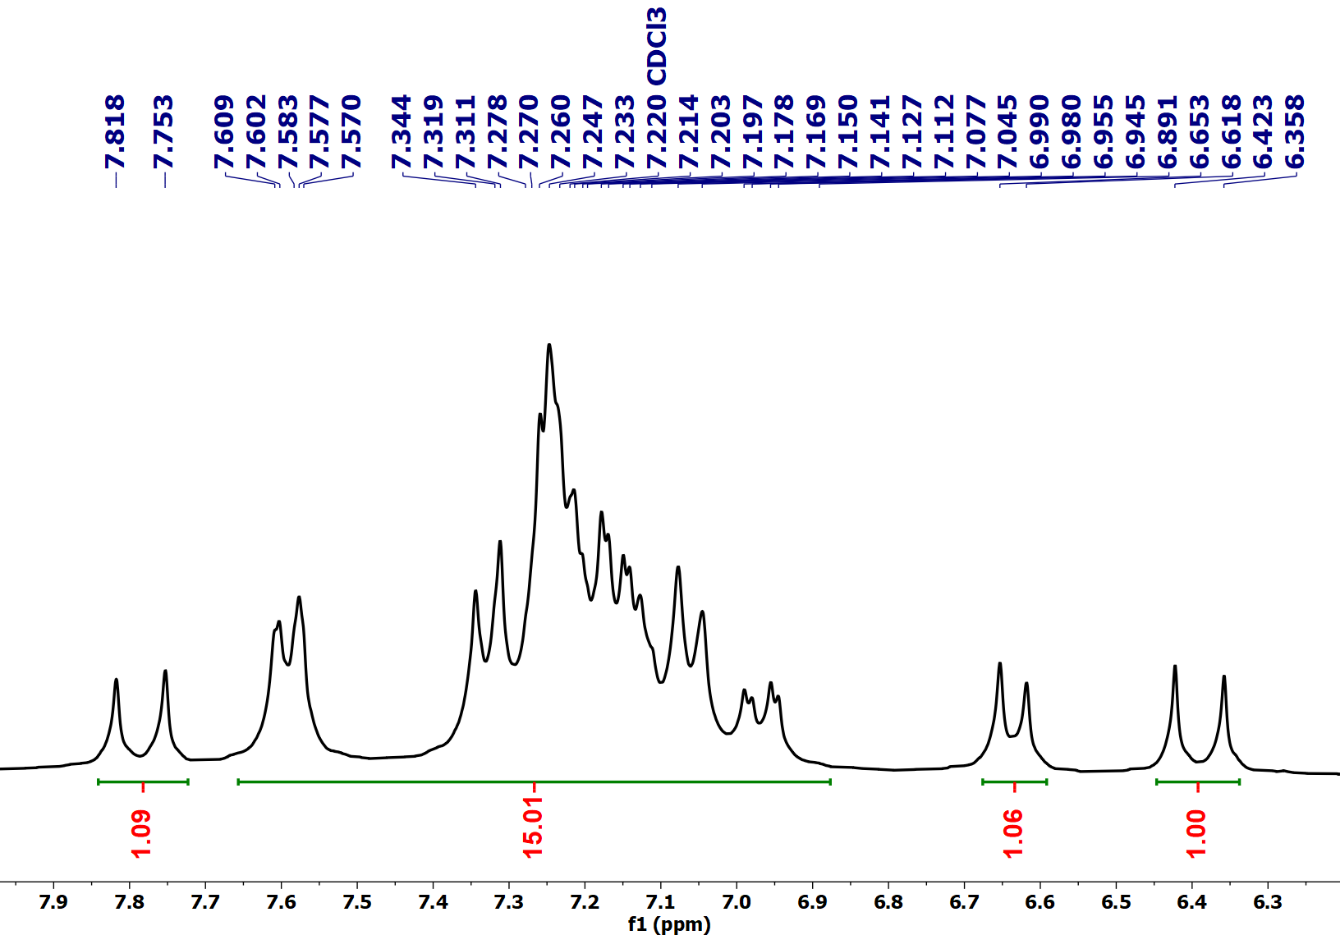
**Figure 70.** Expanded (3) 1H NMR spectrum (250 MHz) of compound **4b** in CDCl3.

a


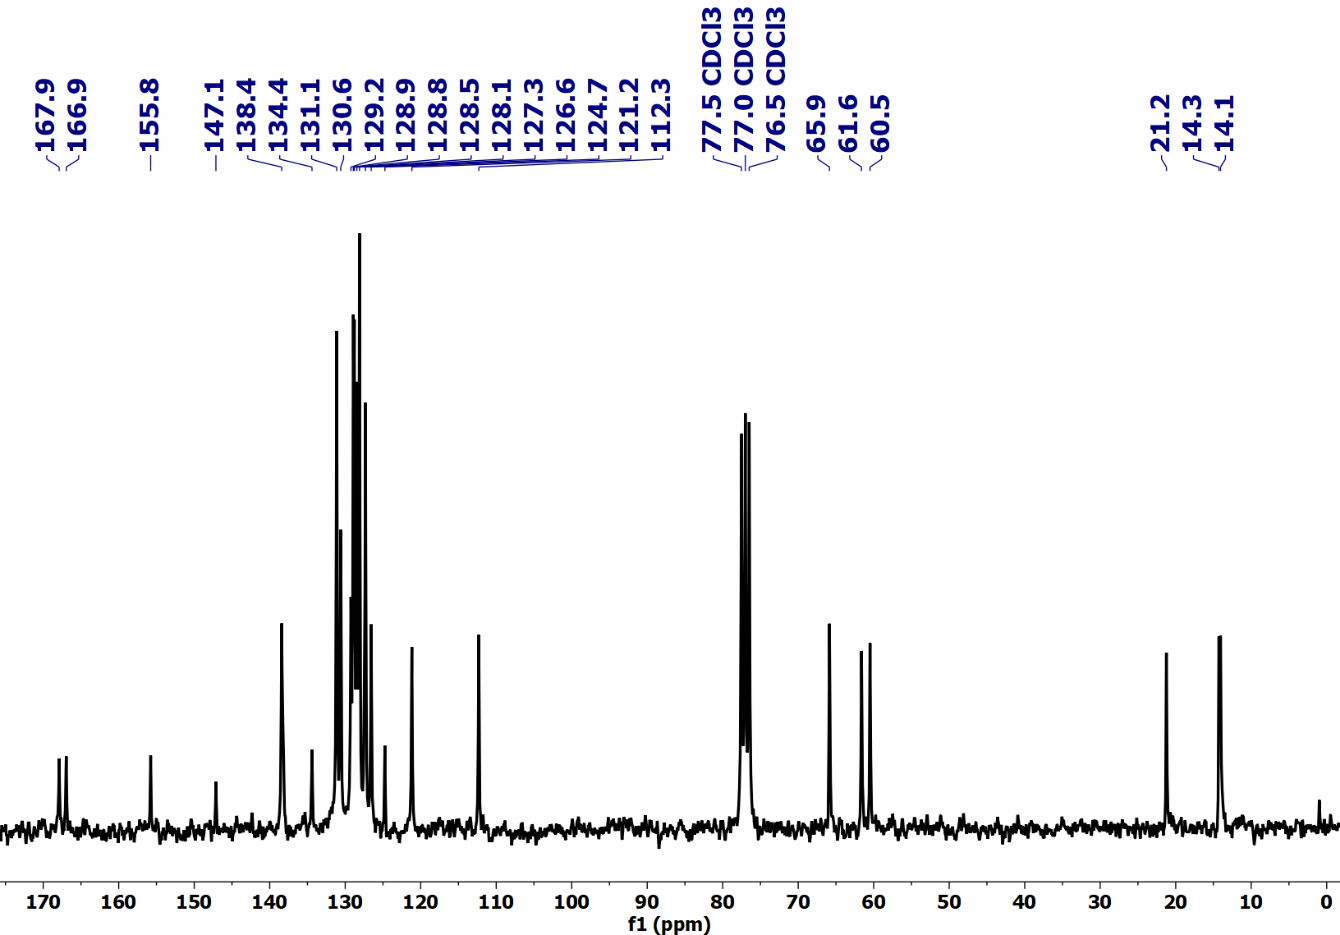
**Figure 71.** 13C NMR spectrum (65 MHz) of compound **4b** in CDCl3.

**(*E*)-Ethyl-3-{2-[2-ethoxy-2-oxoethoxy]-5-[2-(4-methoxyphenyl)-4,5-diphenyl-1*H*-imidazol-1-yl]phenyl}acrylate (4c)**


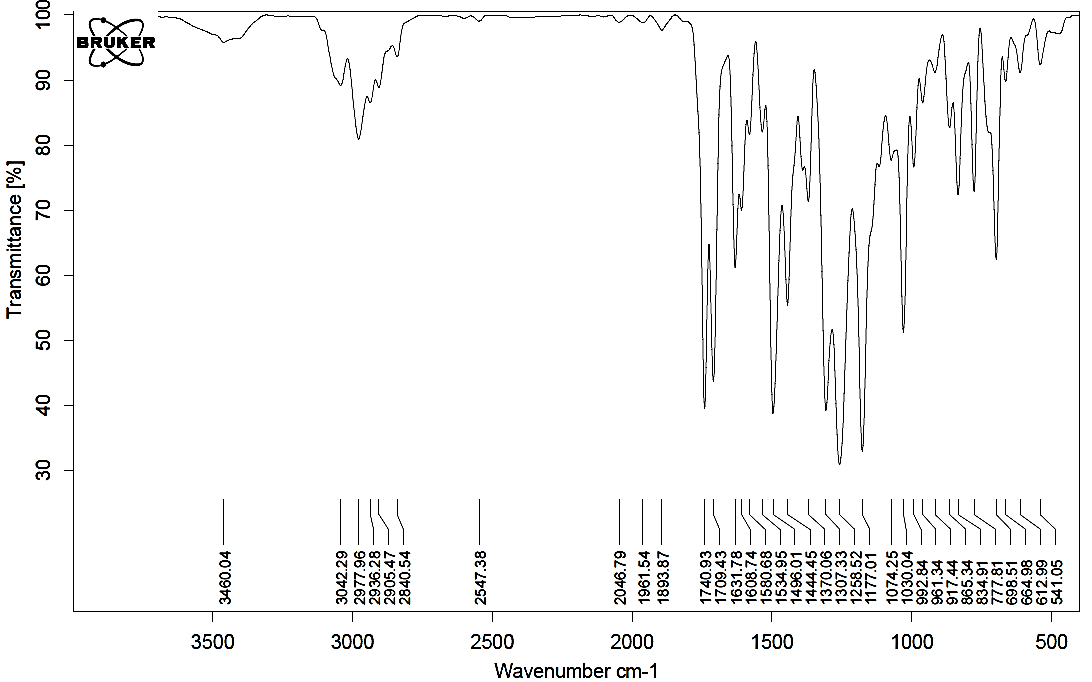
**Figure 72**. FT-IR spectrum of compound **4c.**


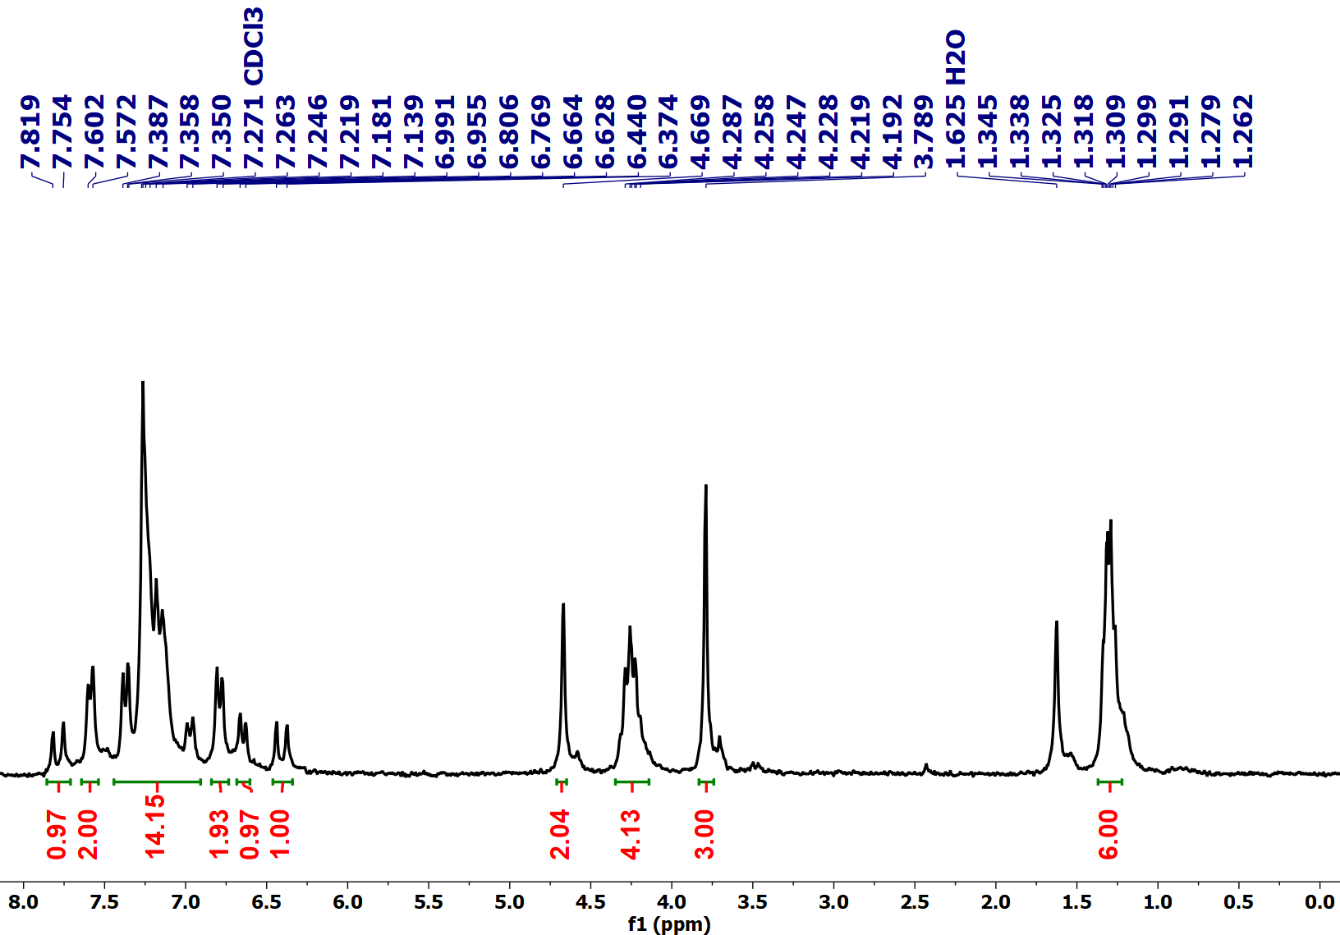
**Figure 73.** 1H NMR spectrum (250 MHz) of compound **4c** in CDCl3.


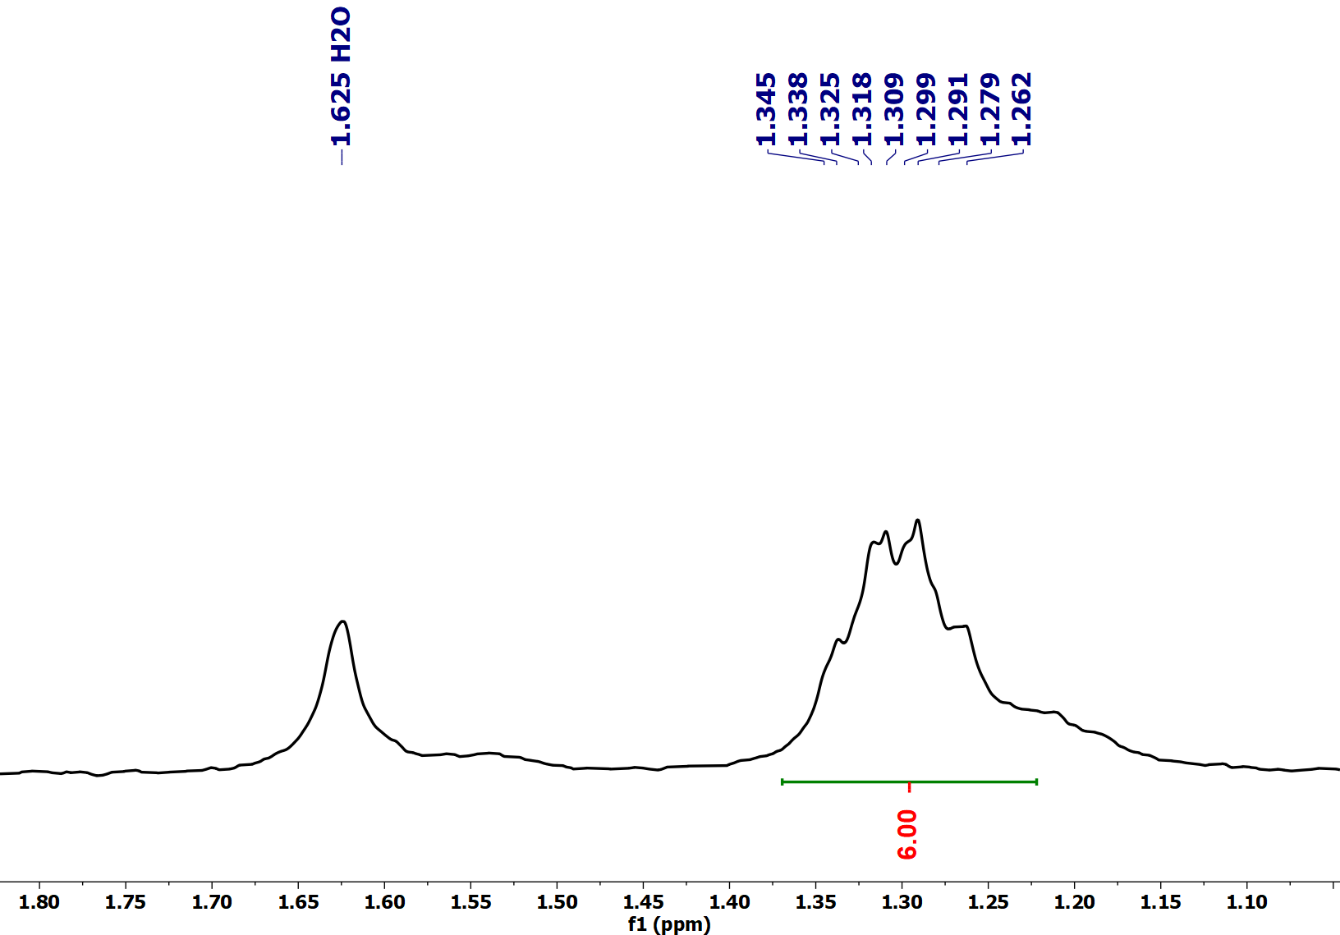
**Figure 74.** Expanded (1) 1H NMR spectrum (250 MHz) of compound **4c** in CDCl3.


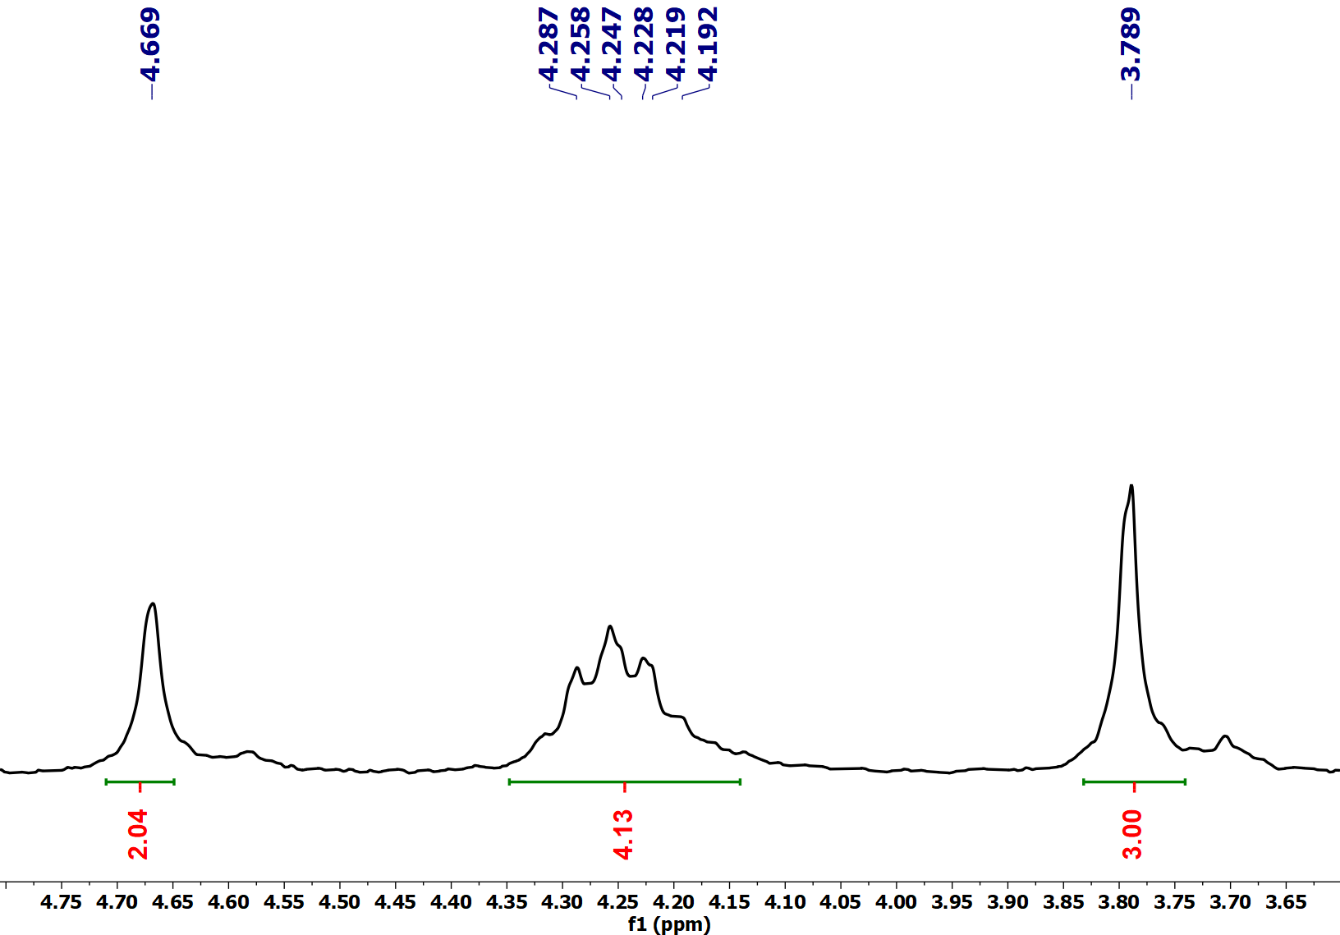
**Figure 75.** Expanded (2) 1H NMR spectrum (250 MHz) of compound **4c** in CDCl3.


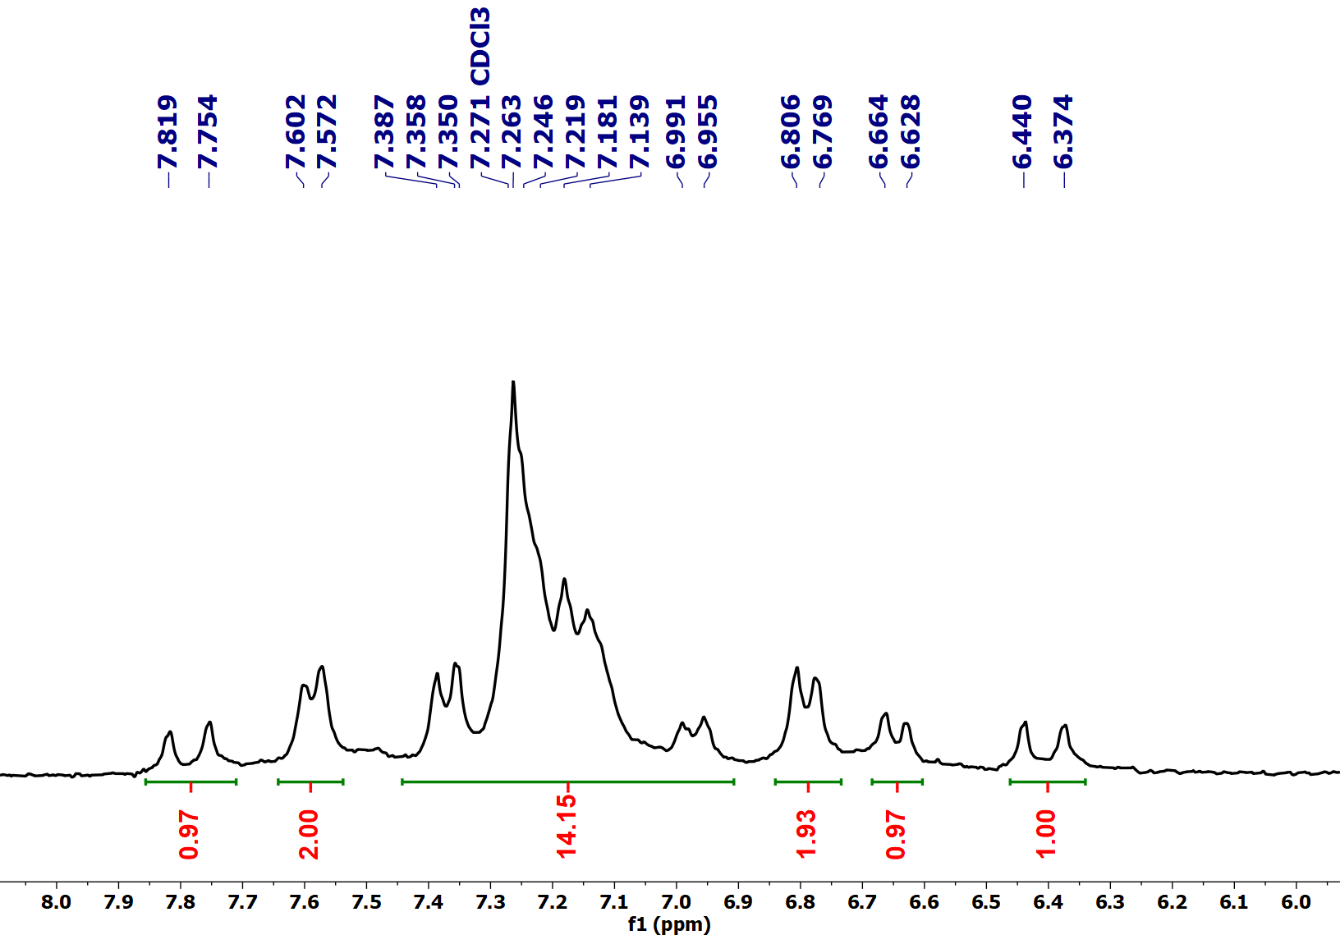
**Figure 76.** Expanded (3) 1H NMR spectrum (250 MHz) of compound **4c** in CDCl3.


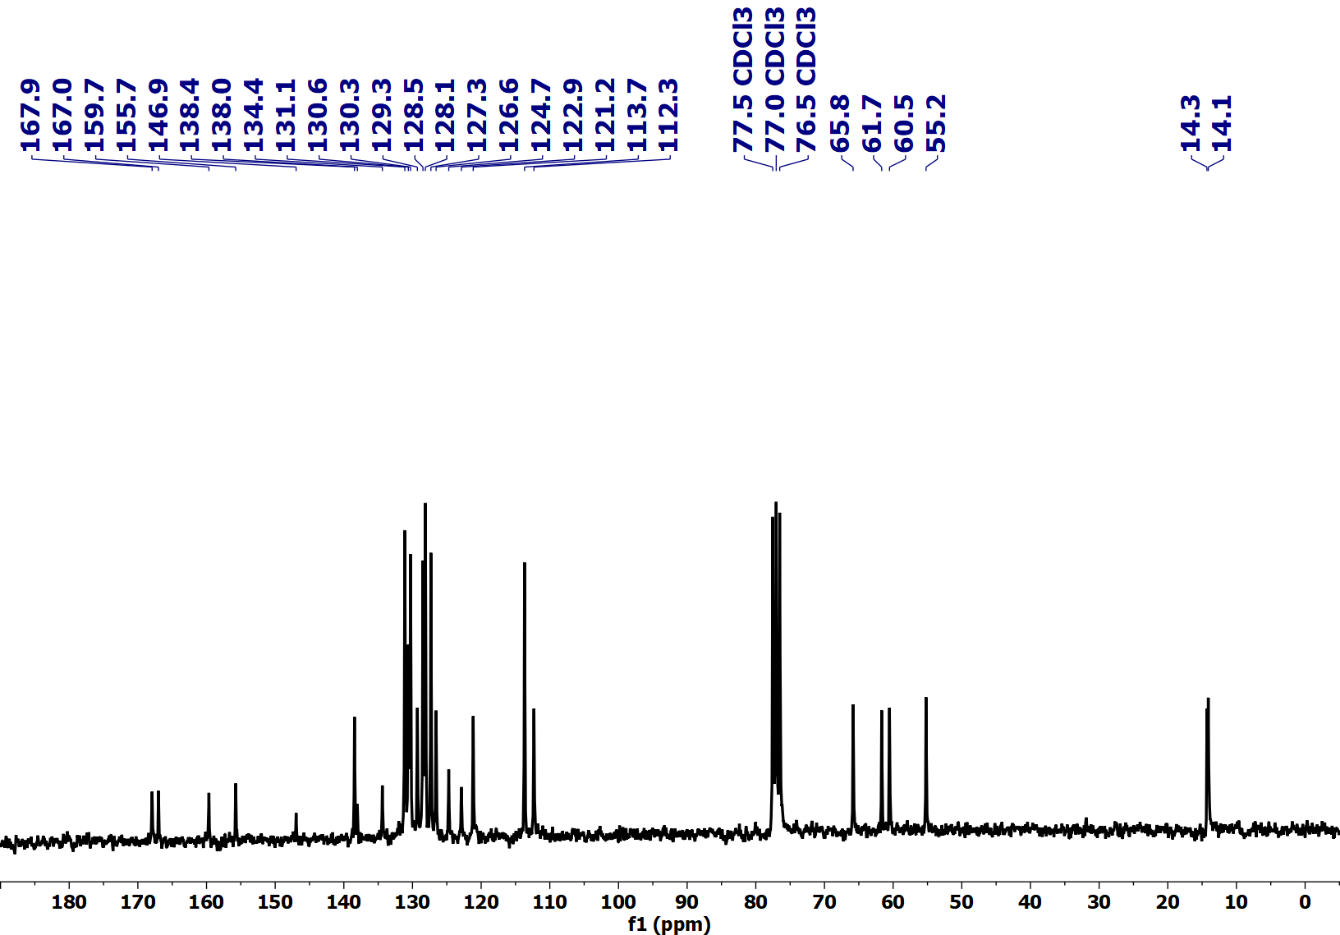
**Figure 77.** 13C NMR spectrum (65 MHz) of compound **4c** in CDCl3.

**(*E*)-Ethyl -3-{2-[2-ethoxy-2-oxoethoxy]-5-[2-(3-nitrophenyl)-4,5-diphenyl-1*H*-imidazol-1-yl]phenyl}acrylate (4d):**


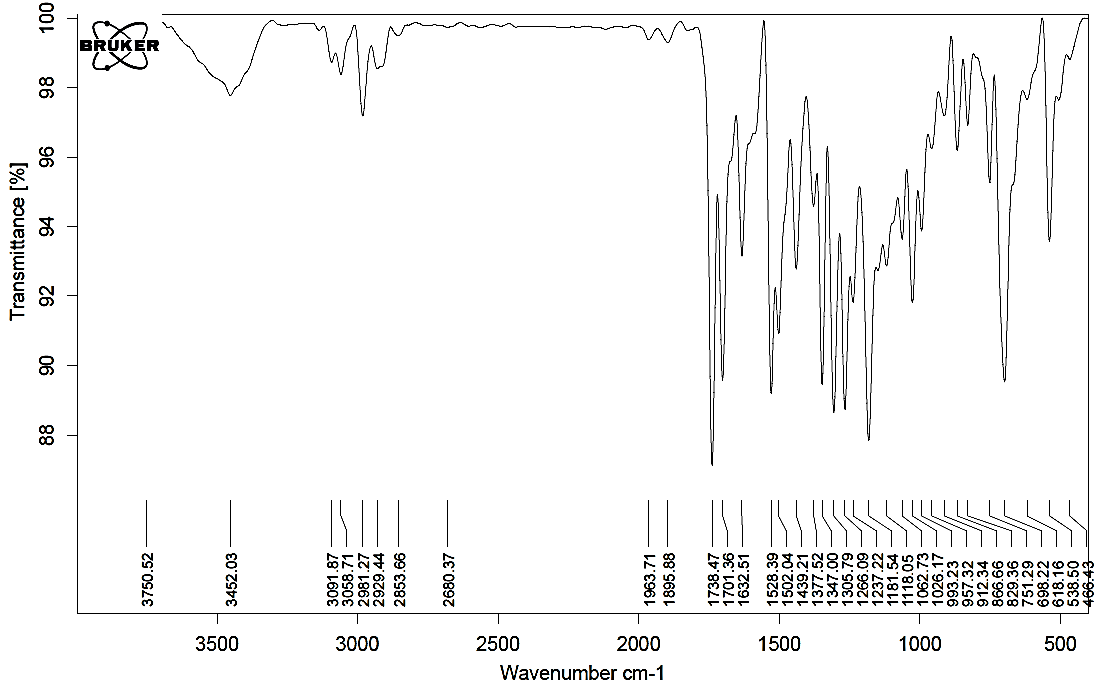
**Figure 78**. FT-IR spectrum of compound **4d.**


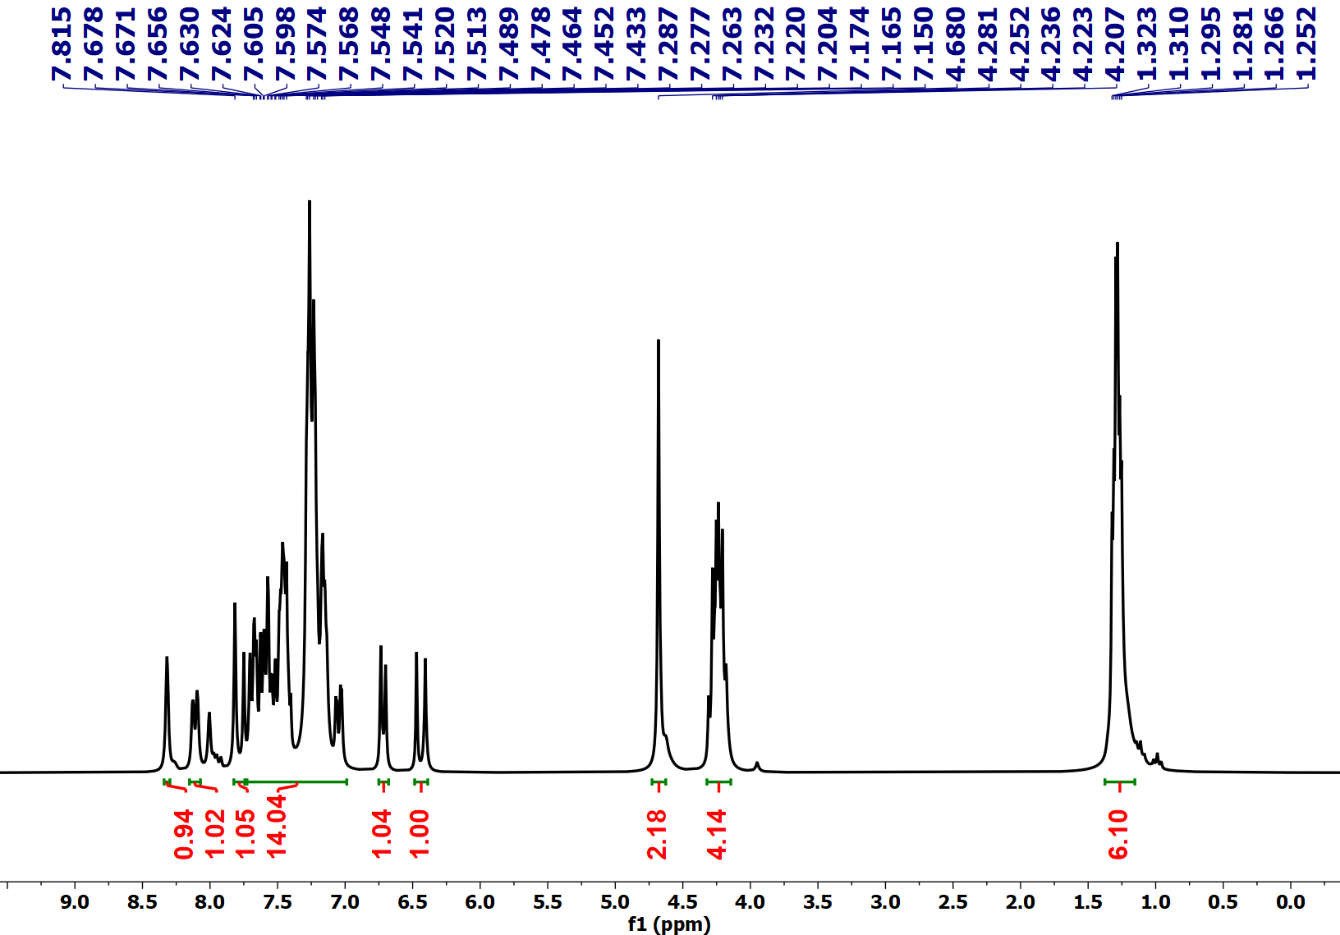
**Figure 79.** 1H NMR spectrum (250 MHz) of compound **4d** in CDCl3.


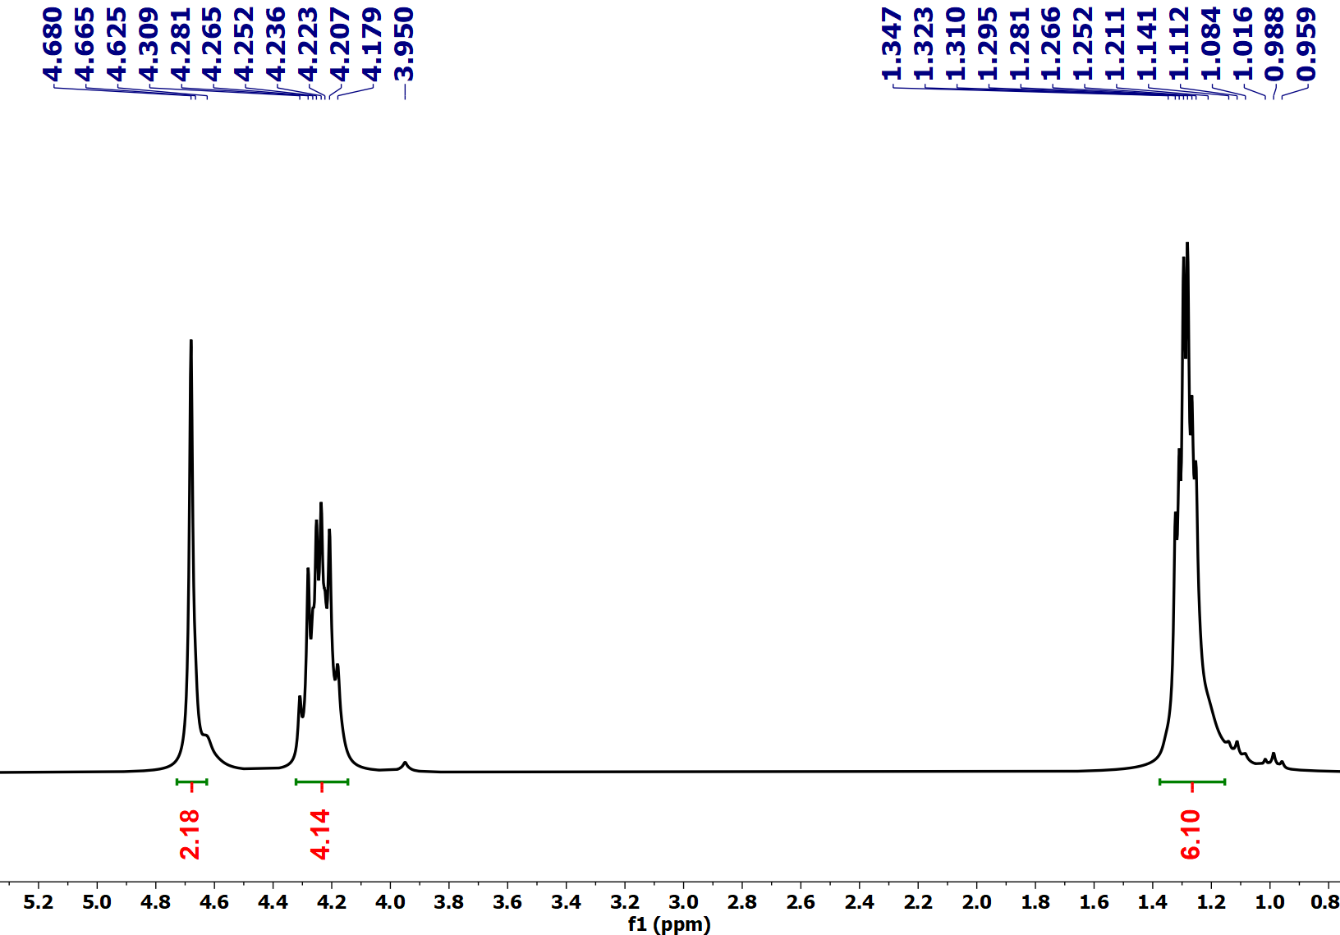
**Figure 80.** Expanded (1) 1H NMR spectrum (250 MHz) of compound **4d** in CDCl3.


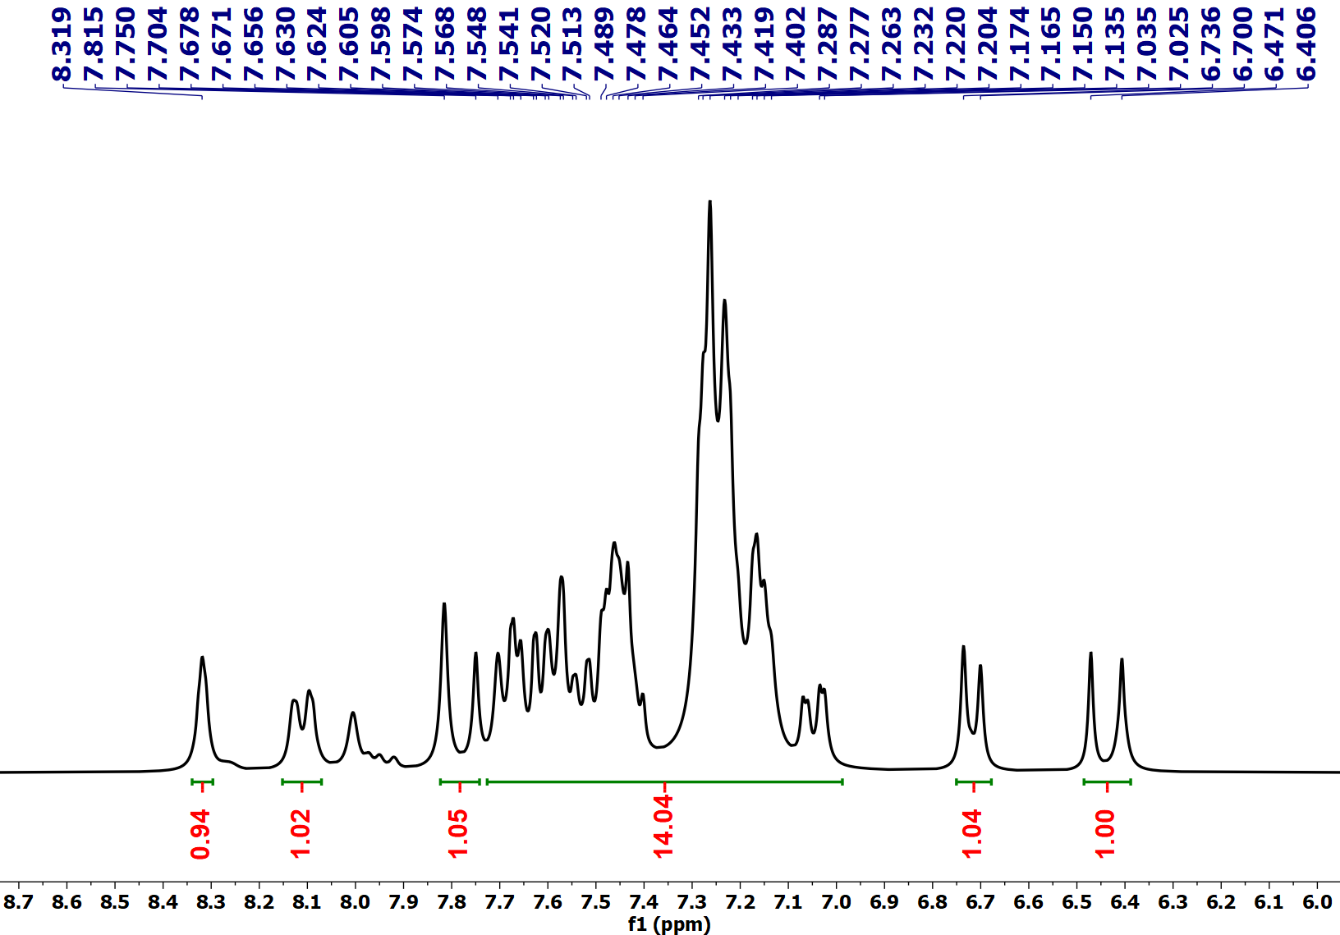
**Figure 81.** Expanded (2) 1H NMR spectrum (250 MHz) of compound **4d** in CDCl3.

b

c

a


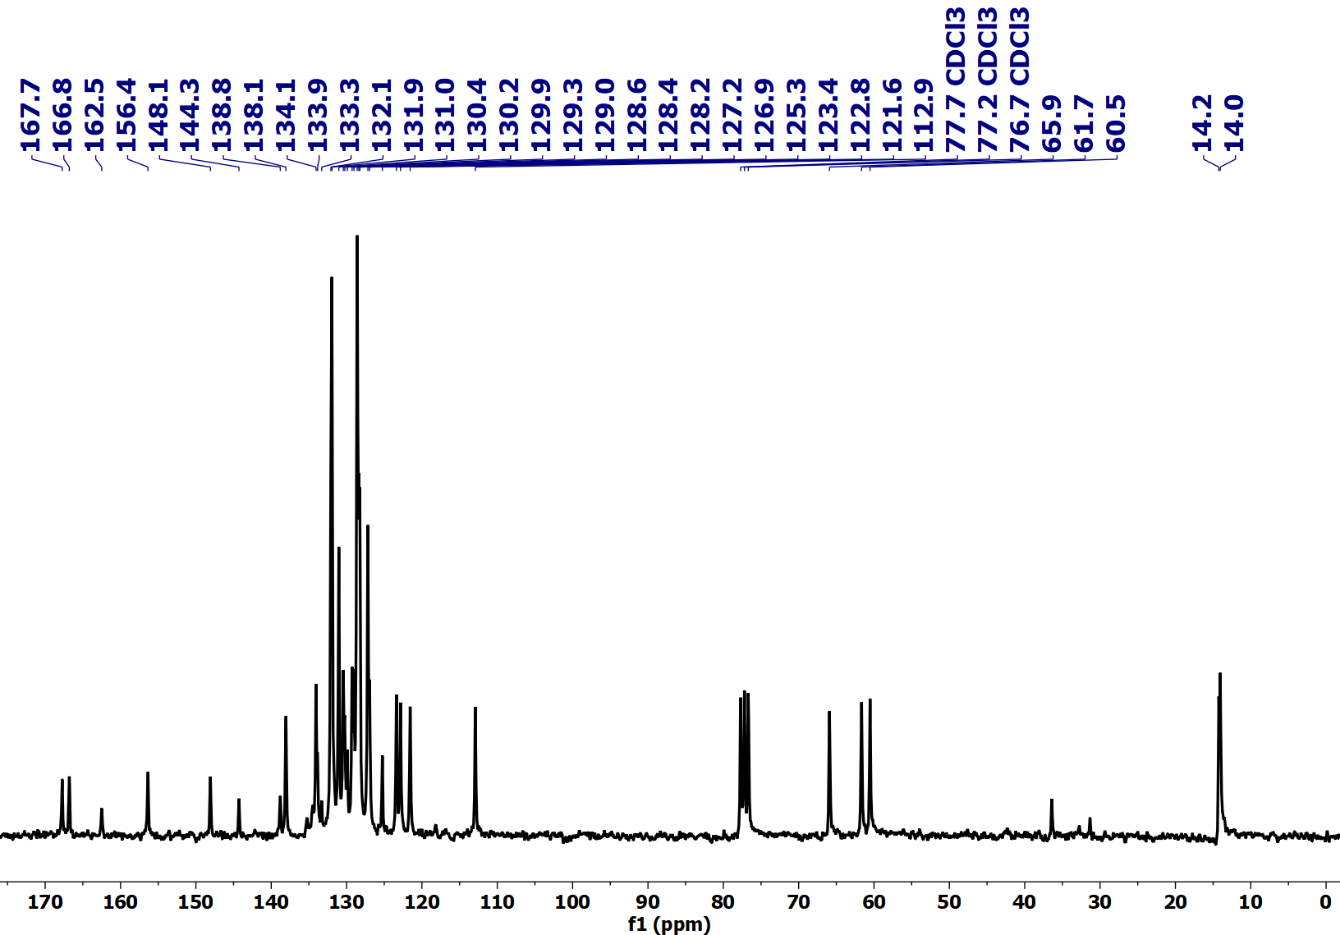
**Figure 82.** 13C NMR spectrum (65 MHz) of compound **4d** in CDCl3.

**(*E*)-Ethyl -3-{5-[4,5-diphenyl-2-(thiophen-3-yl)-1*H*-imidazol-1-yl]-2-[2-ethoxy-2-oxoethoxy]phenyl}acrylate (4e)**


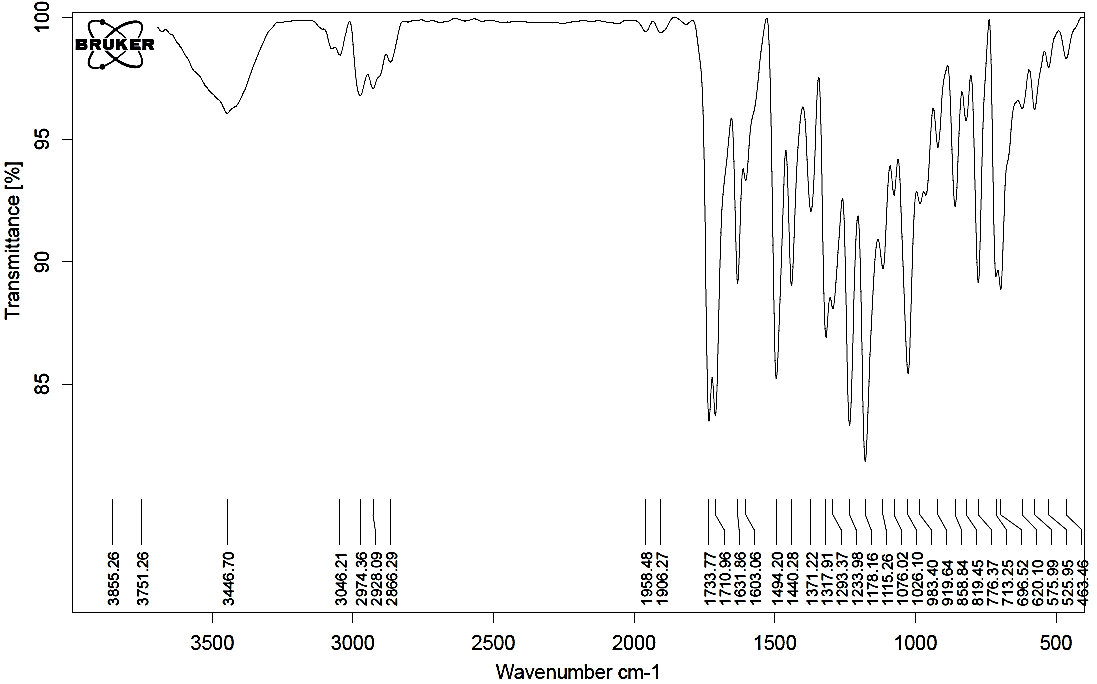
**Figure 83**. FT-IR spectrum of compound **4e.**


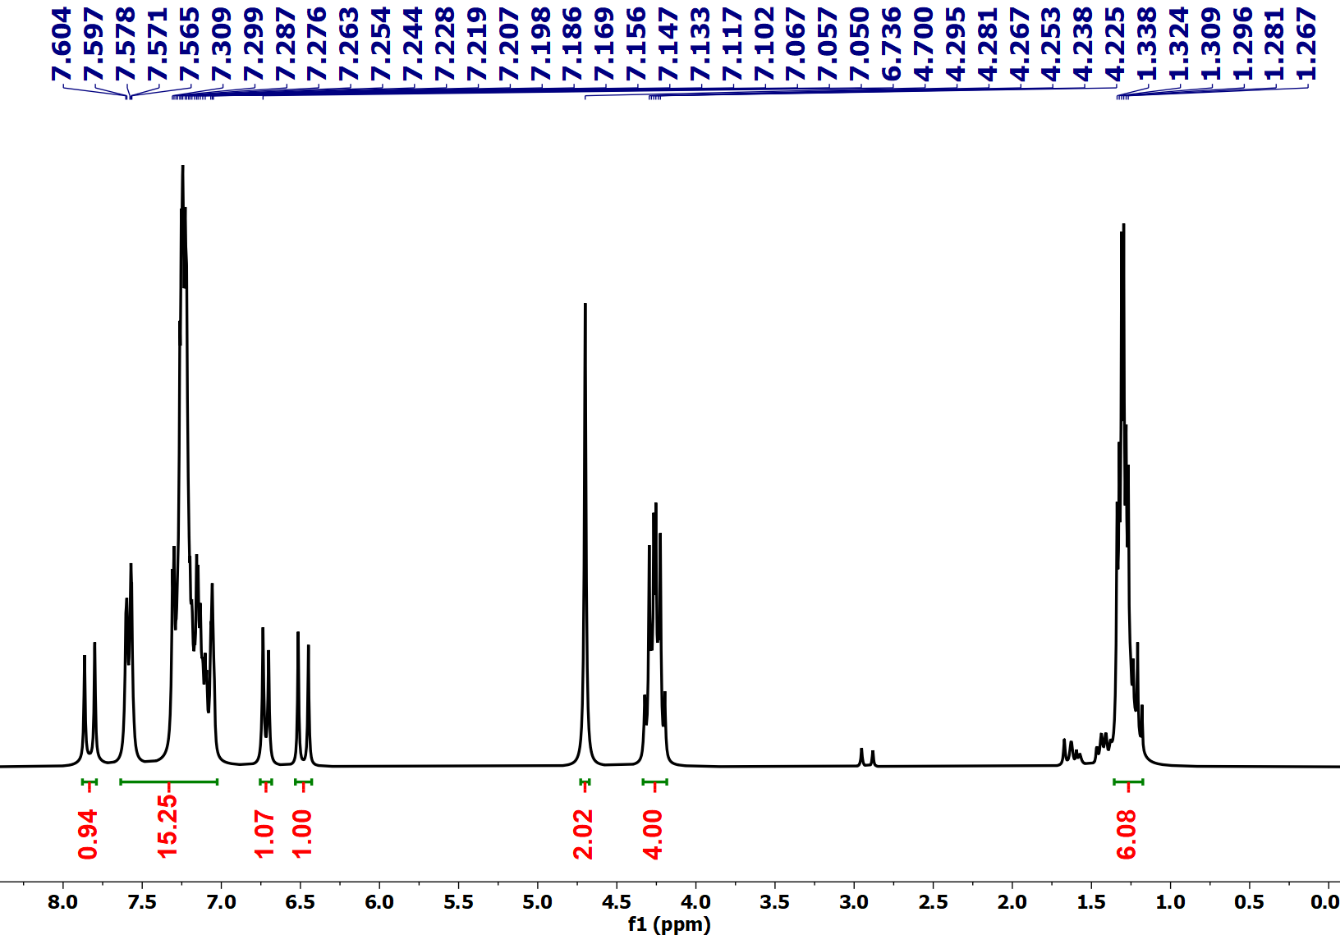
**Figure 84.** 1H NMR spectrum (250 MHz) of compound **4e** in CDCl3.


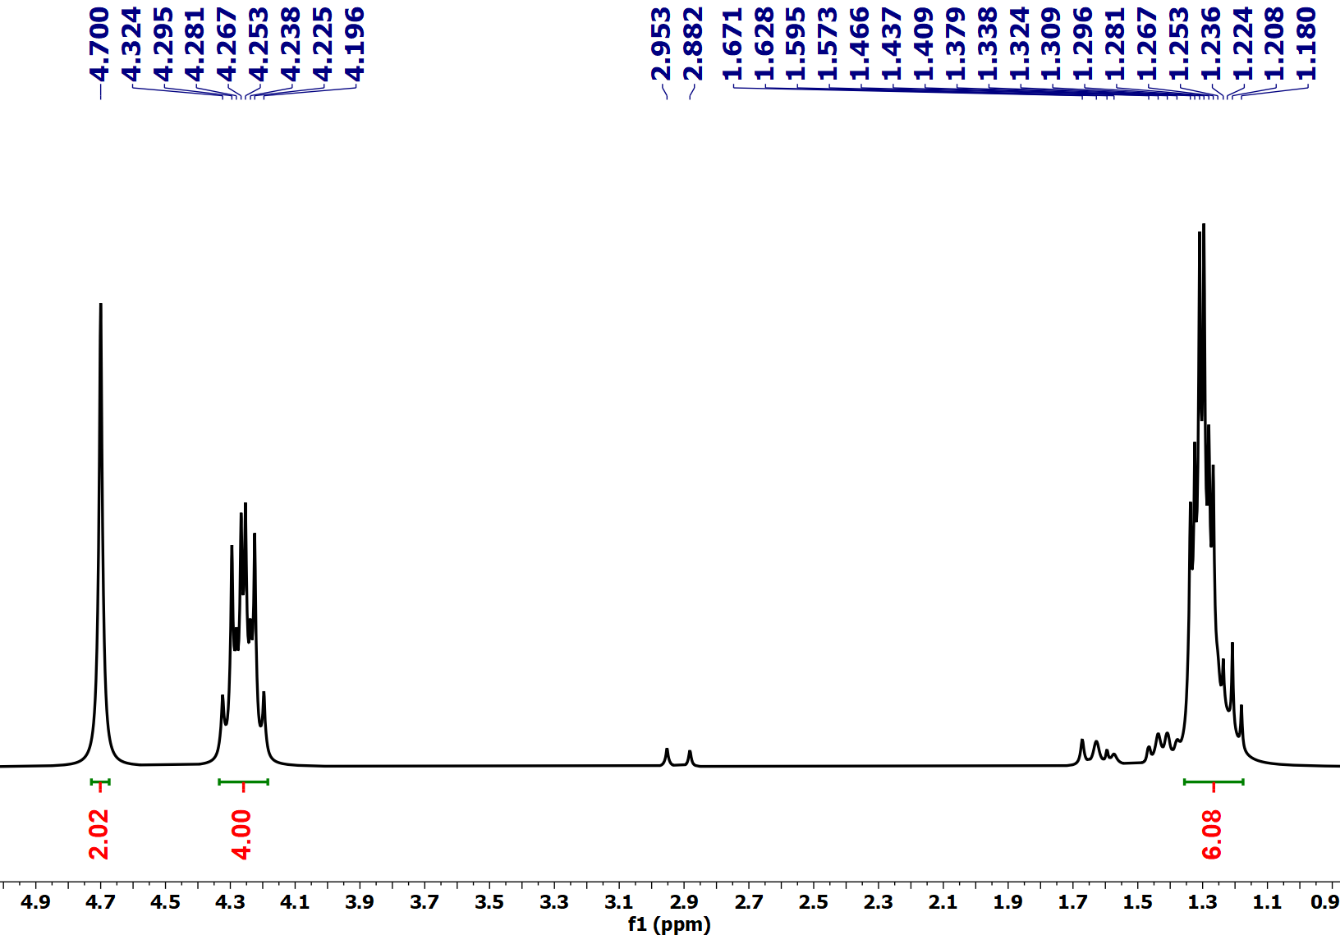
**Figure 85.** Expanded (1) 1H NMR spectrum (250 MHz) of compound **4e** in CDCl3.


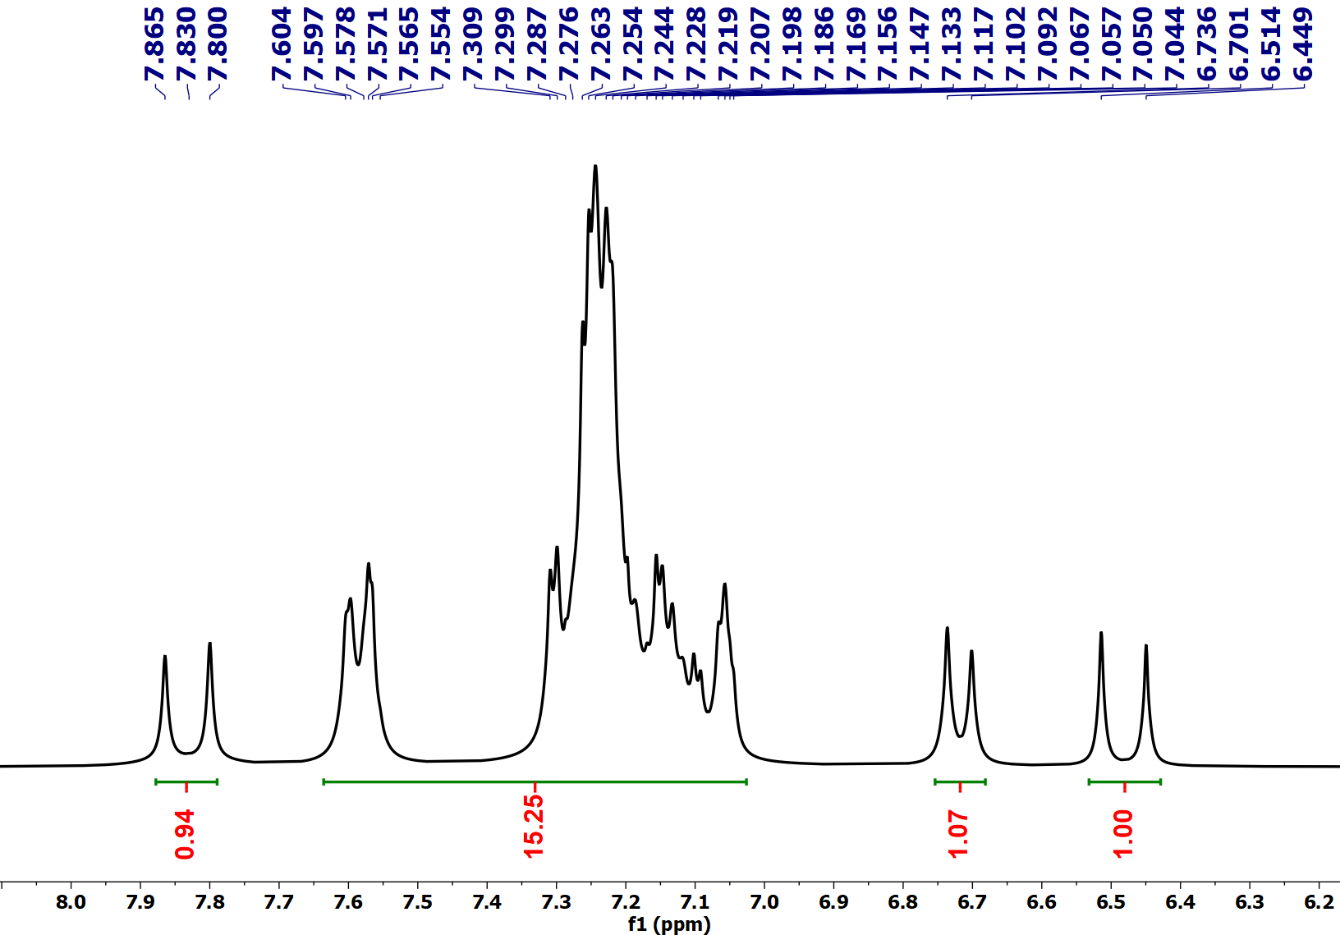
**Figure 86.** Expanded (2) 1H NMR spectrum (250 MHz) of compound **4e** in CDCl3.

a


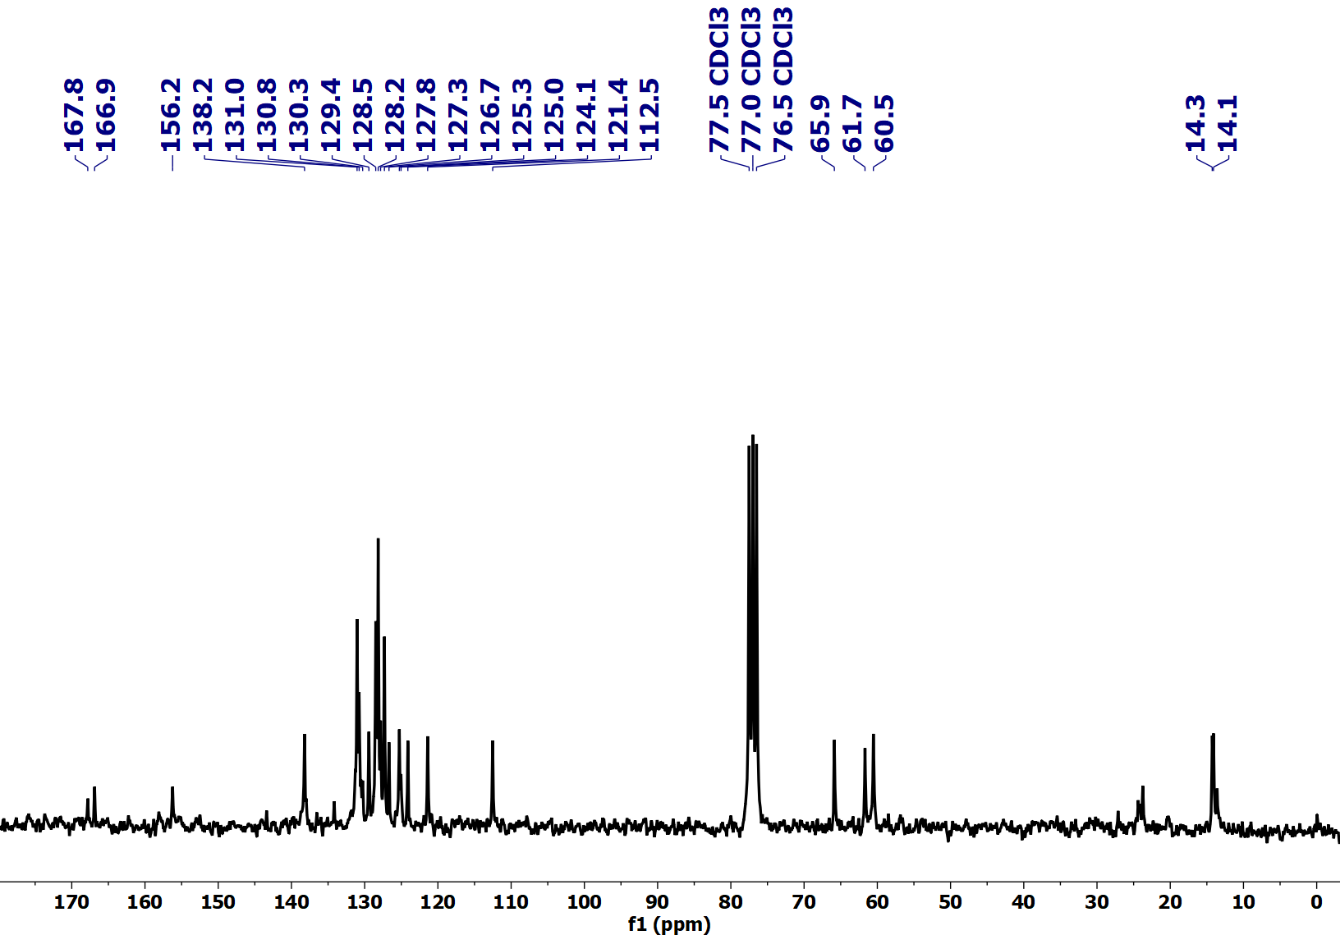
**Figure 87.** 13C NMR spectrum (65 MHz) of compound **4e** in CDCl3.

**(*E*)-Ethyl-3-{2-[2-ethoxy-2-oxoethoxy]-5-[2-(4-isopropylphenyl)-4,5-diphenyl-1*H*-imidazol-1-yl]phenyl}acrylate (4f)**

**
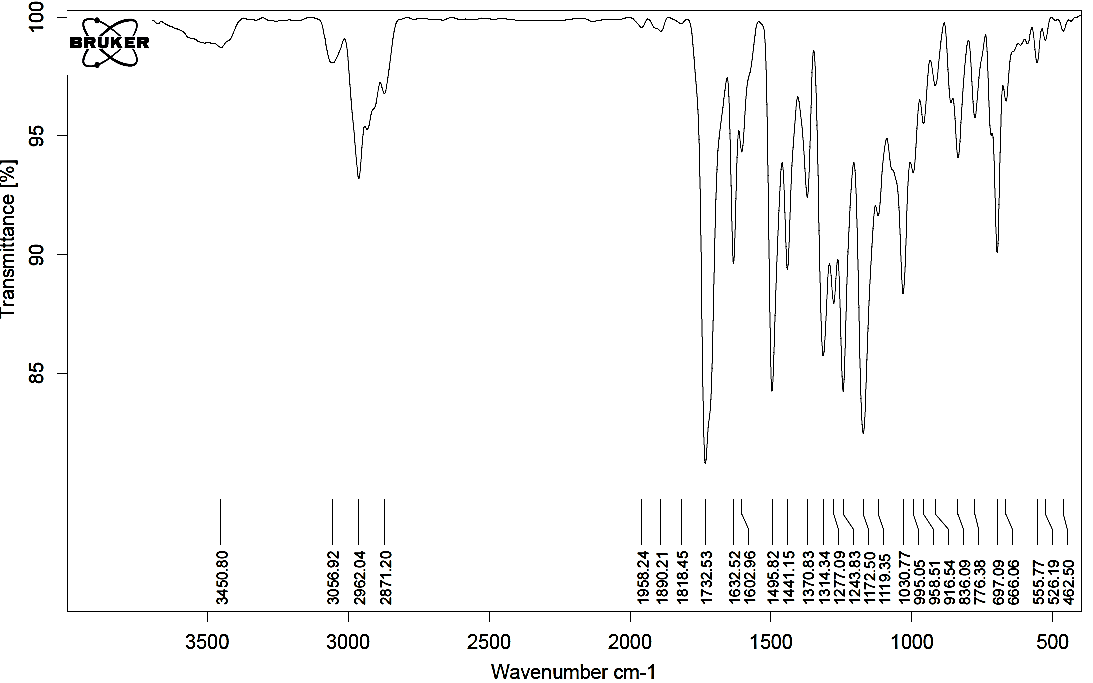
Figure 88**. FT-IR spectrum of compound **4f.**


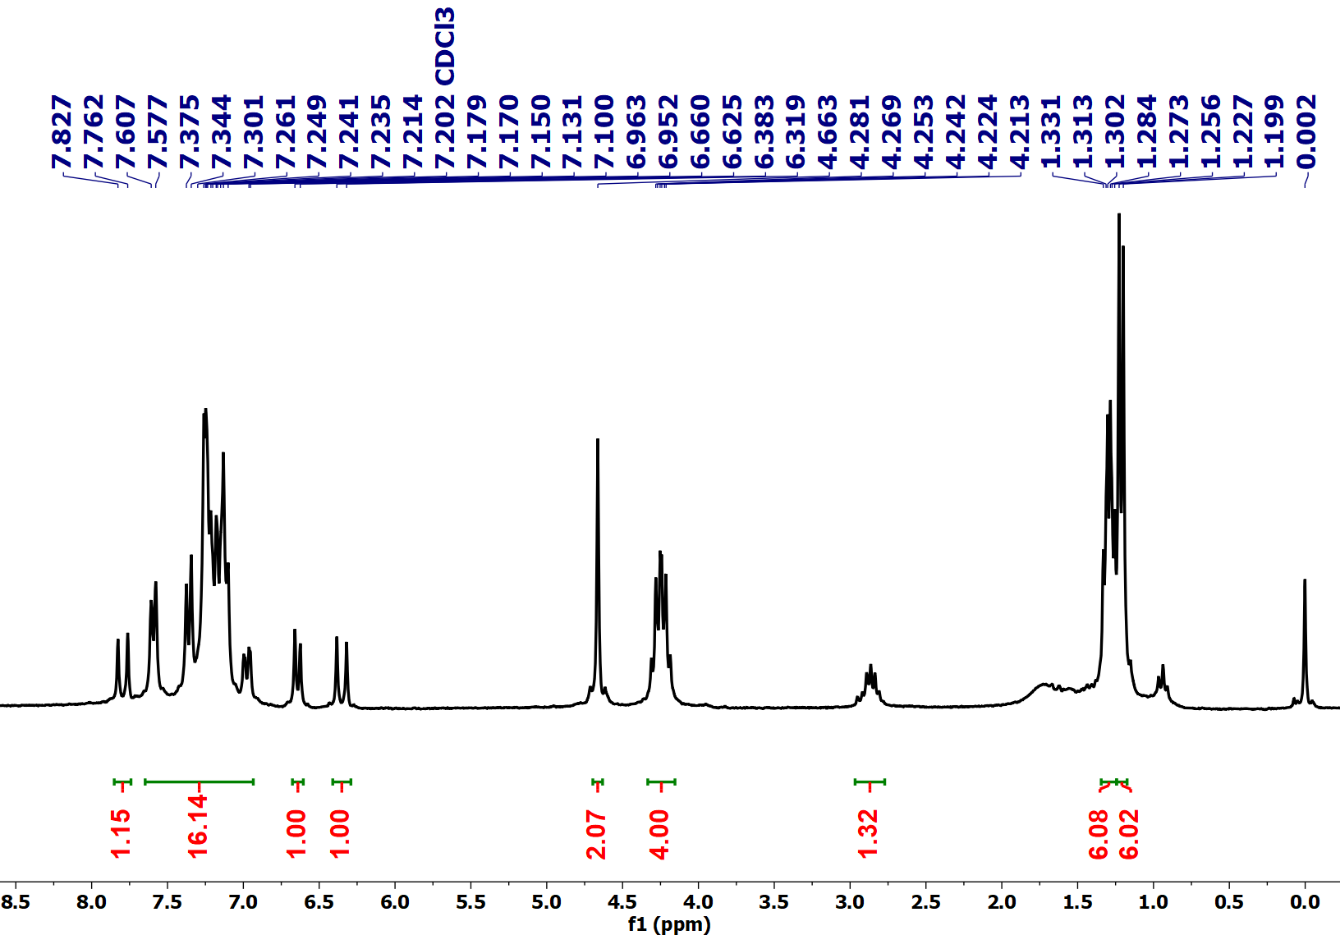
**Figure 89.** 1H NMR spectrum (250 MHz) of compound **4f** in CDCl3.


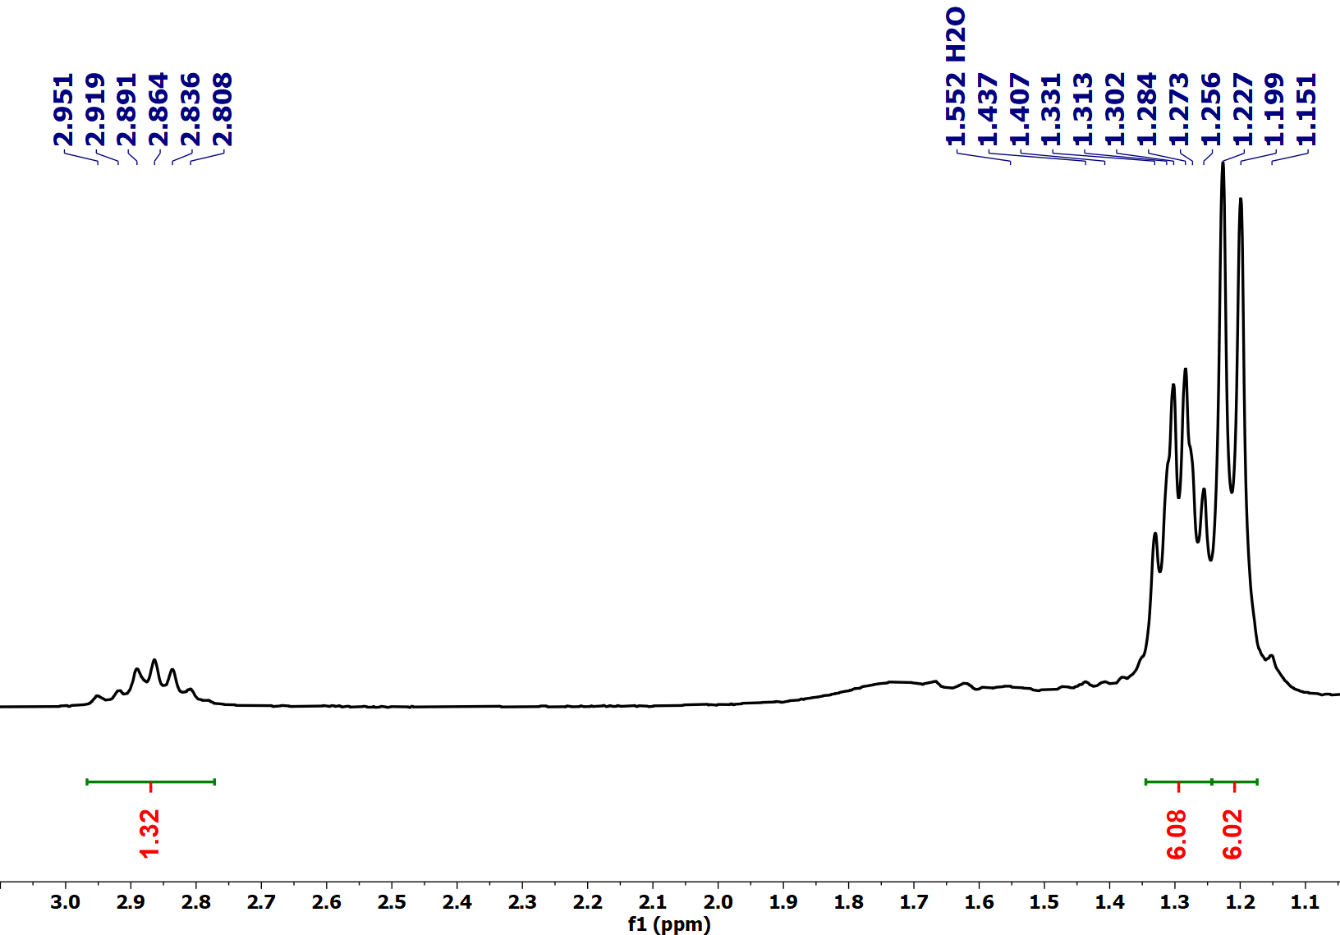
**Figure 90.** Expanded (1) 1H NMR spectrum (250 MHz) of compound **4f** in CDCl3.


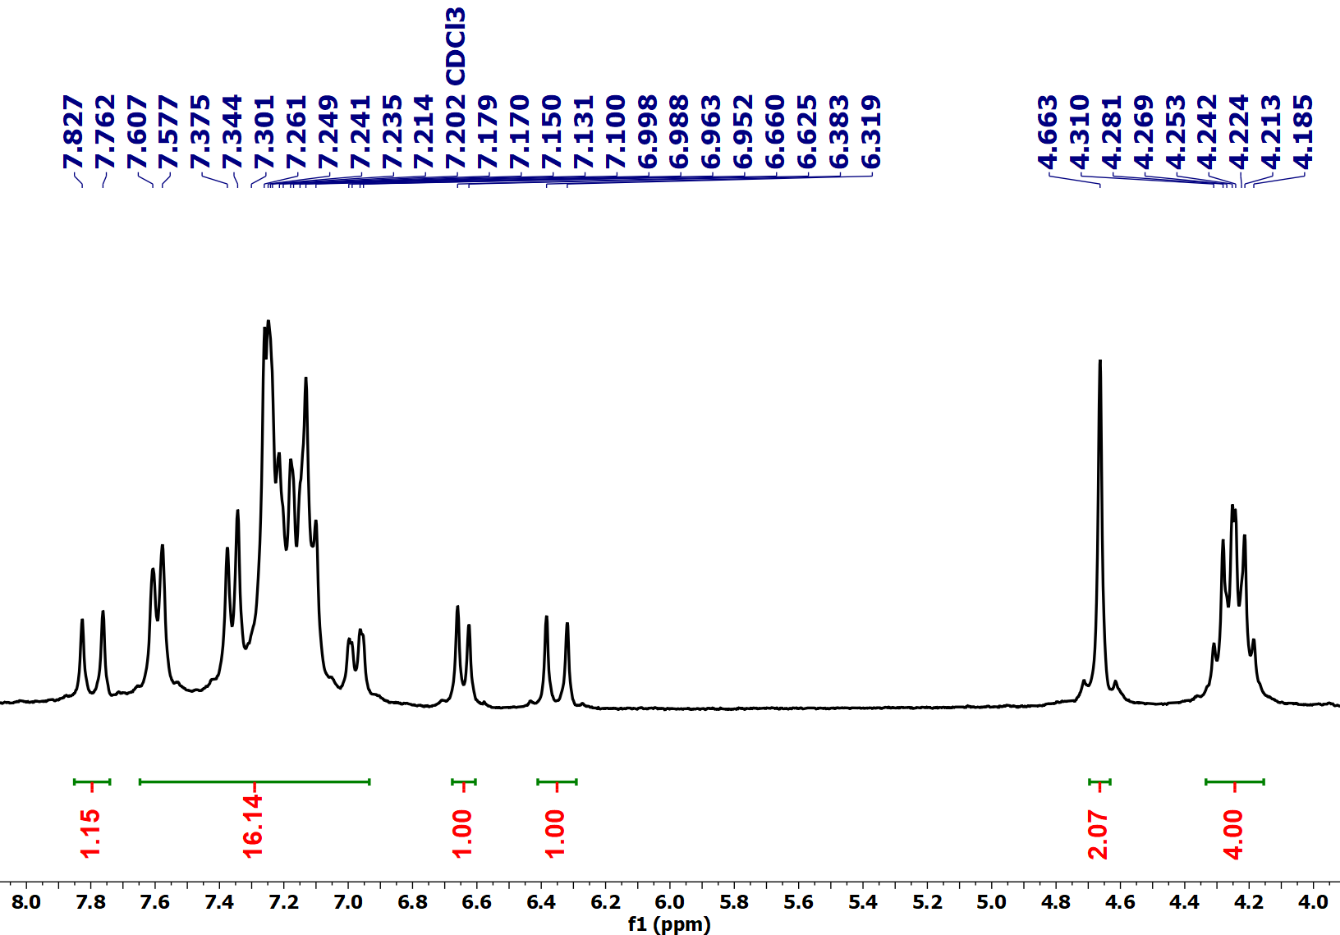
**Figure 91.** Expanded (2) 1H NMR spectrum (250 MHz) of compound **4f** in CDCl3.


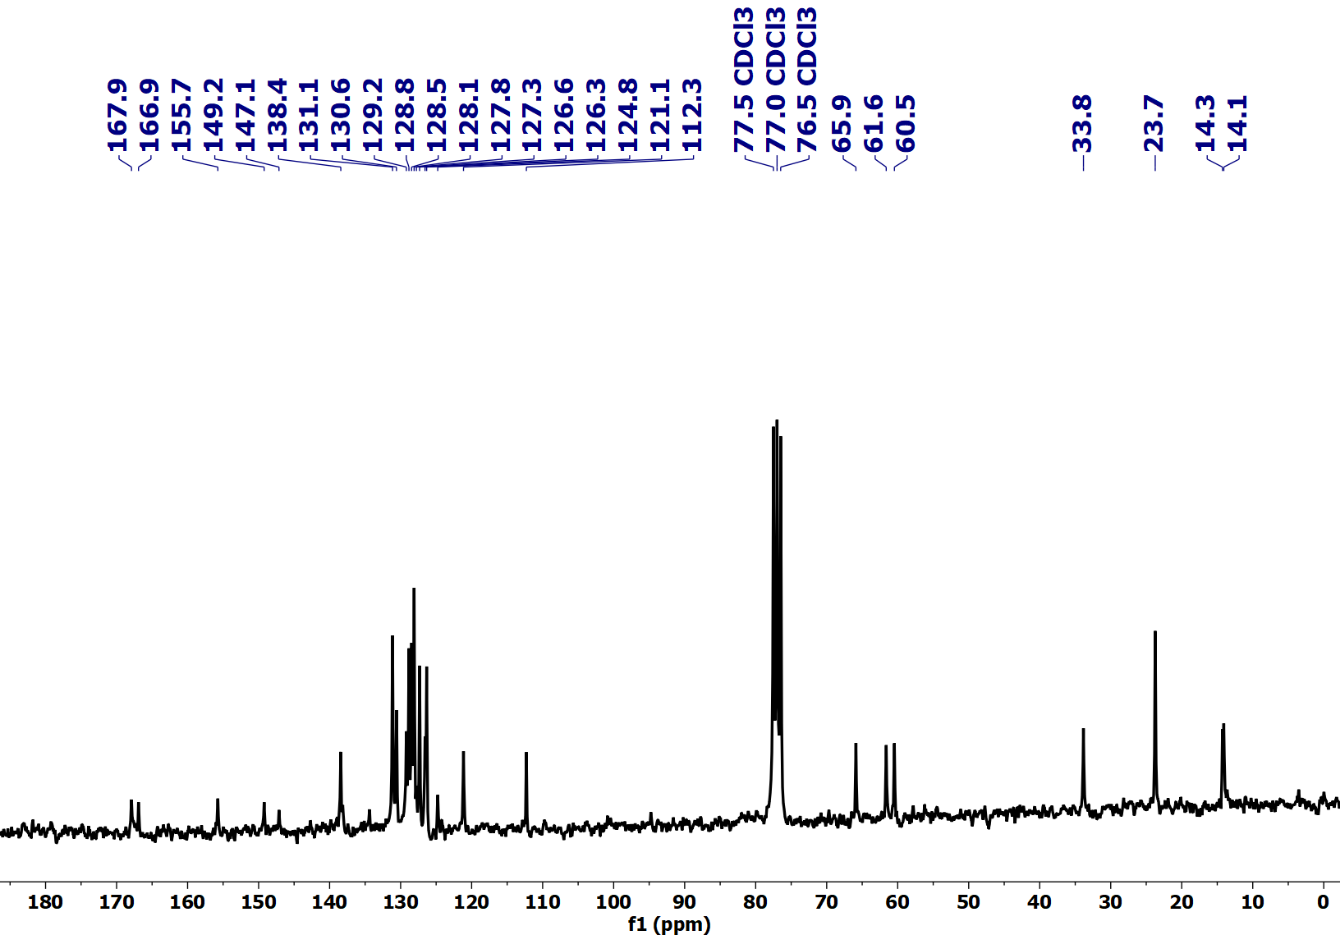
**Figure 92.** 13C NMR spectrum (65 MHz) of compound **4f** in CDCl3.

**(*E*)-Ethyl -3-{5-[2-(4-chlorophenyl)-4,5-diphenyl-1*H*-imidazol-1-yl]-2-[2-ethoxy-2-oxoethoxy]phenyl}acrylate (4g)**

**
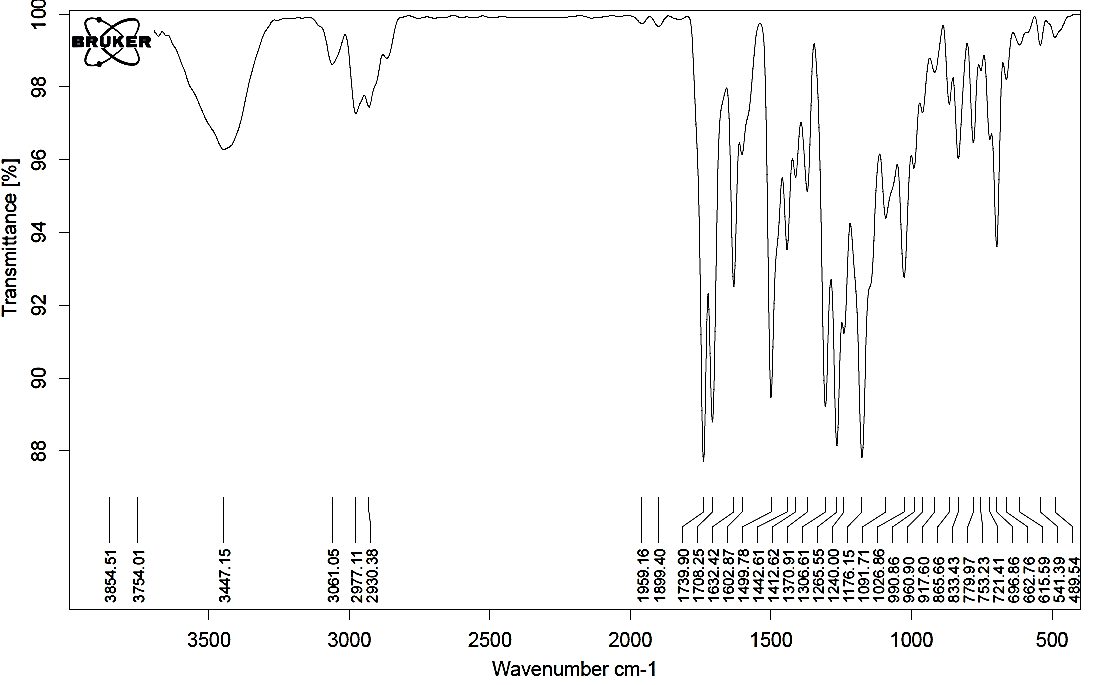
****Figure 93**. FT-IR spectrum of compound **4g.**

**
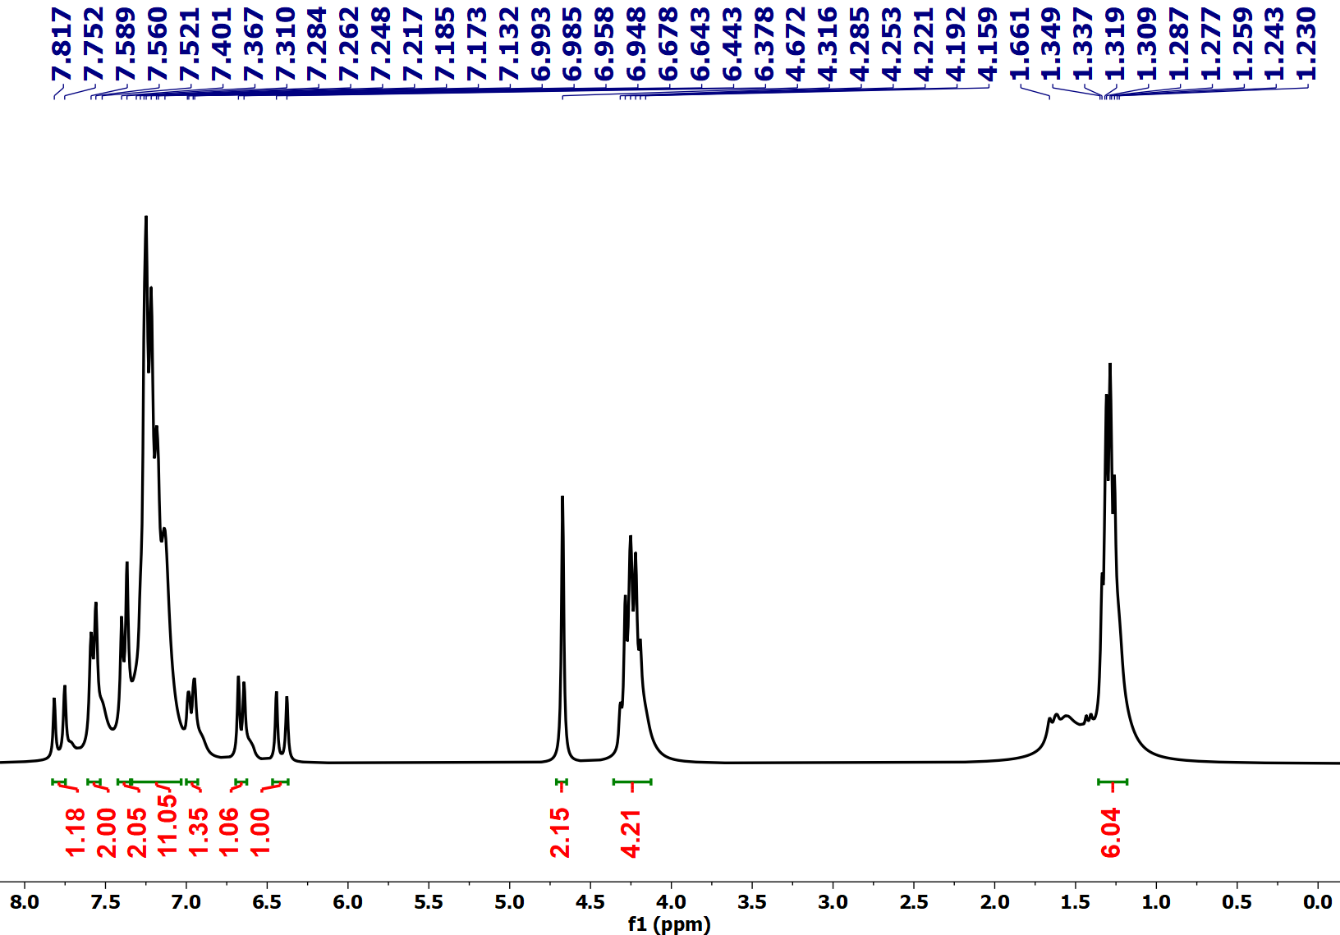
****Figure 94.** 1H NMR spectrum (250 MHz) of compound **4g** in CDCl3.


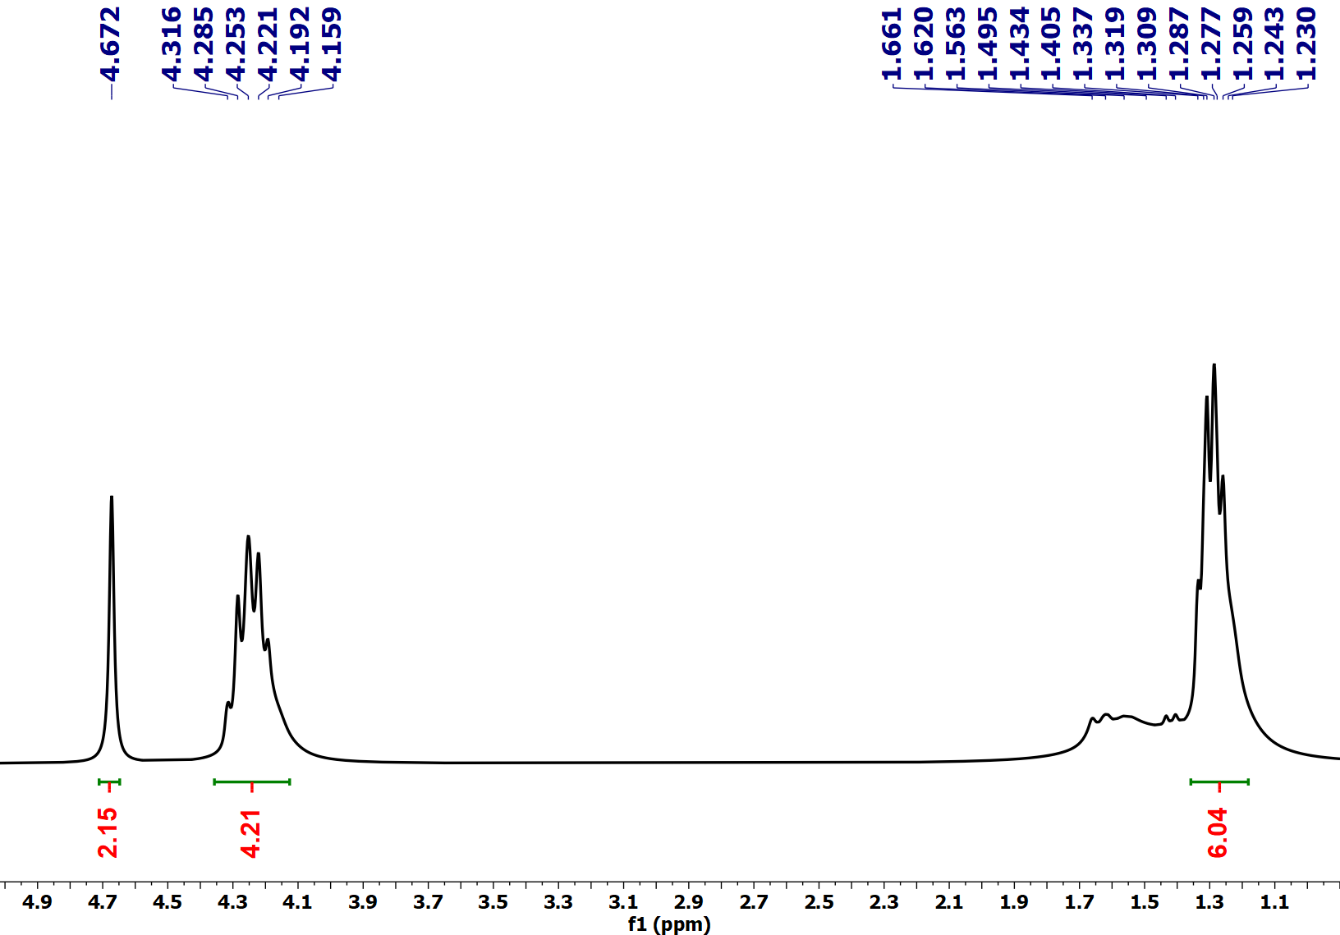
**Figure 95.** Expanded (1) 1H NMR spectrum (250 MHz) of compound **4g** in CDCl3.


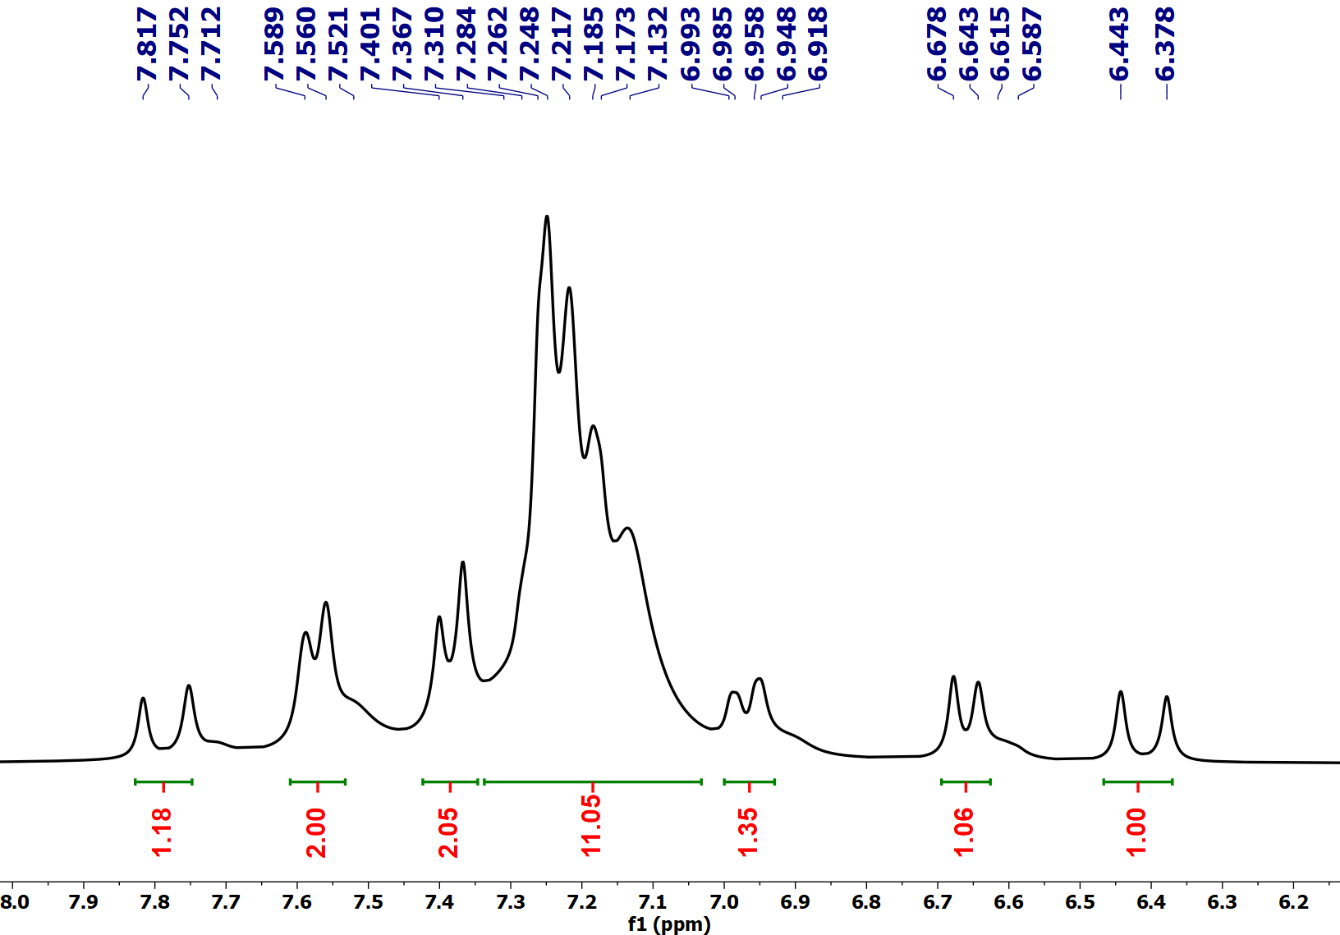
**Figure 96.** Expanded (2) 1H NMR spectrum (250 MHz) of compound **4g** in CDCl3.

a


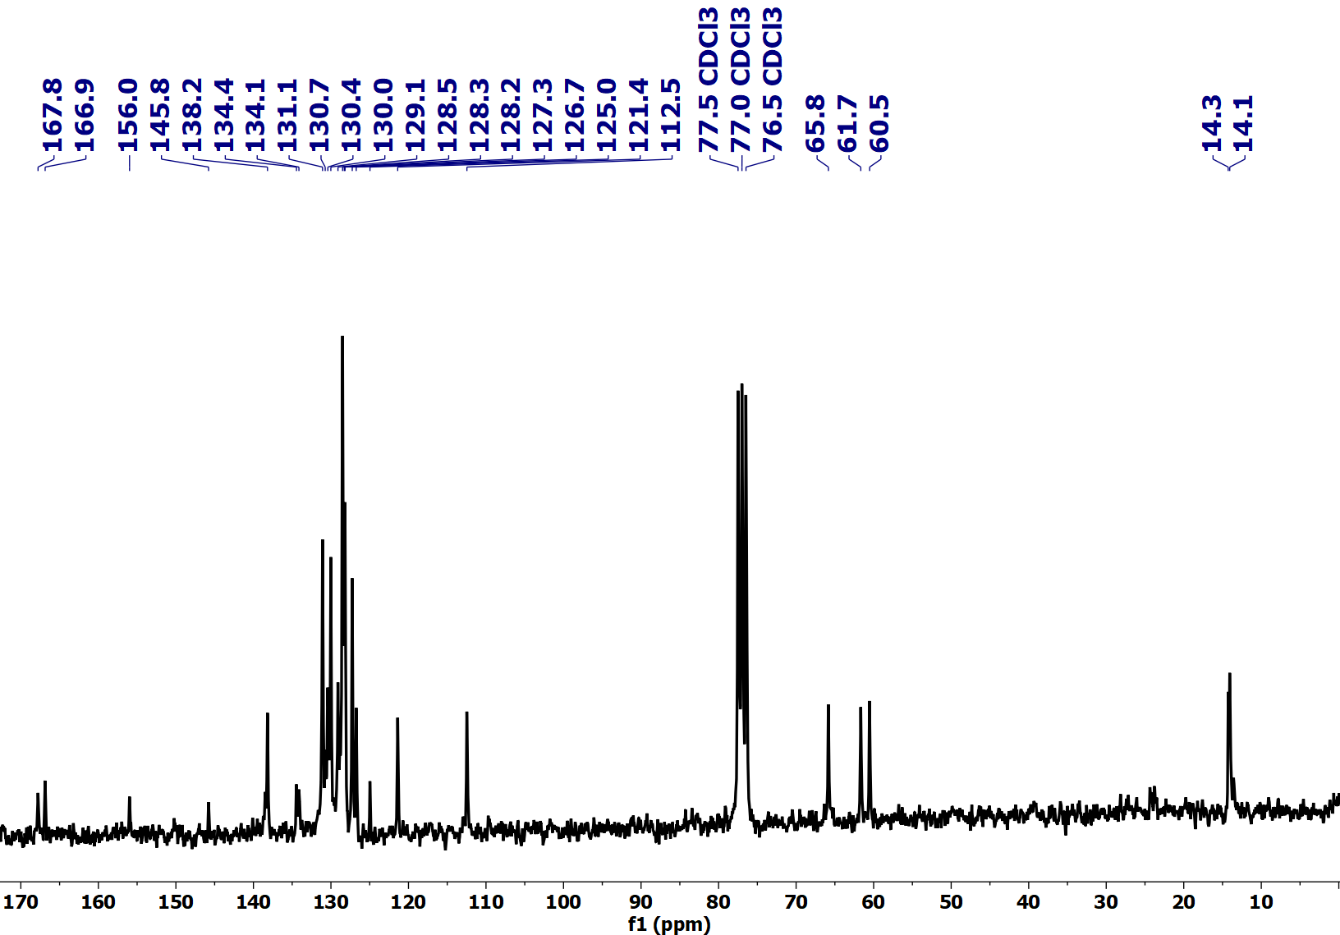
**Figure 97.** 13C NMR spectrum (65 MHz) of compound **4g** in CDCl3.

**(*E*)-Ethyl -3-{5-[4,5-diphenyl-1-(*p*-tolyl)-1*H*-imidazol-2-yl]-2-[2-ethoxy-2-oxoethoxy]phenyl}acrylate (4h):**


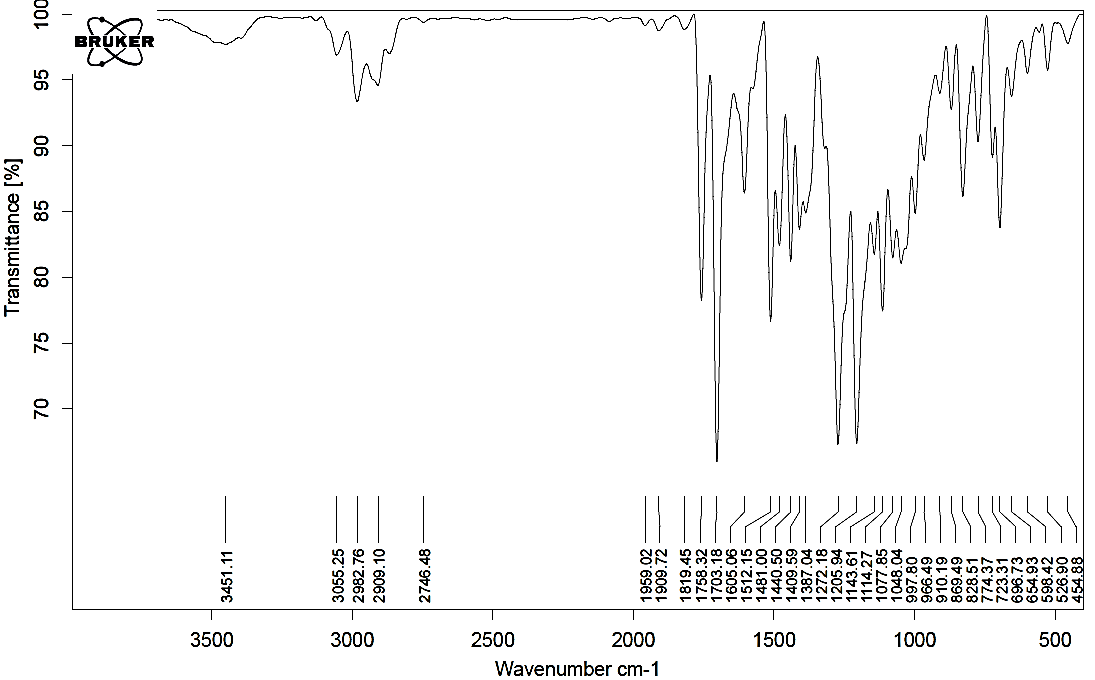
**Figure 98**. FT-IR spectrum of compound **4h.**


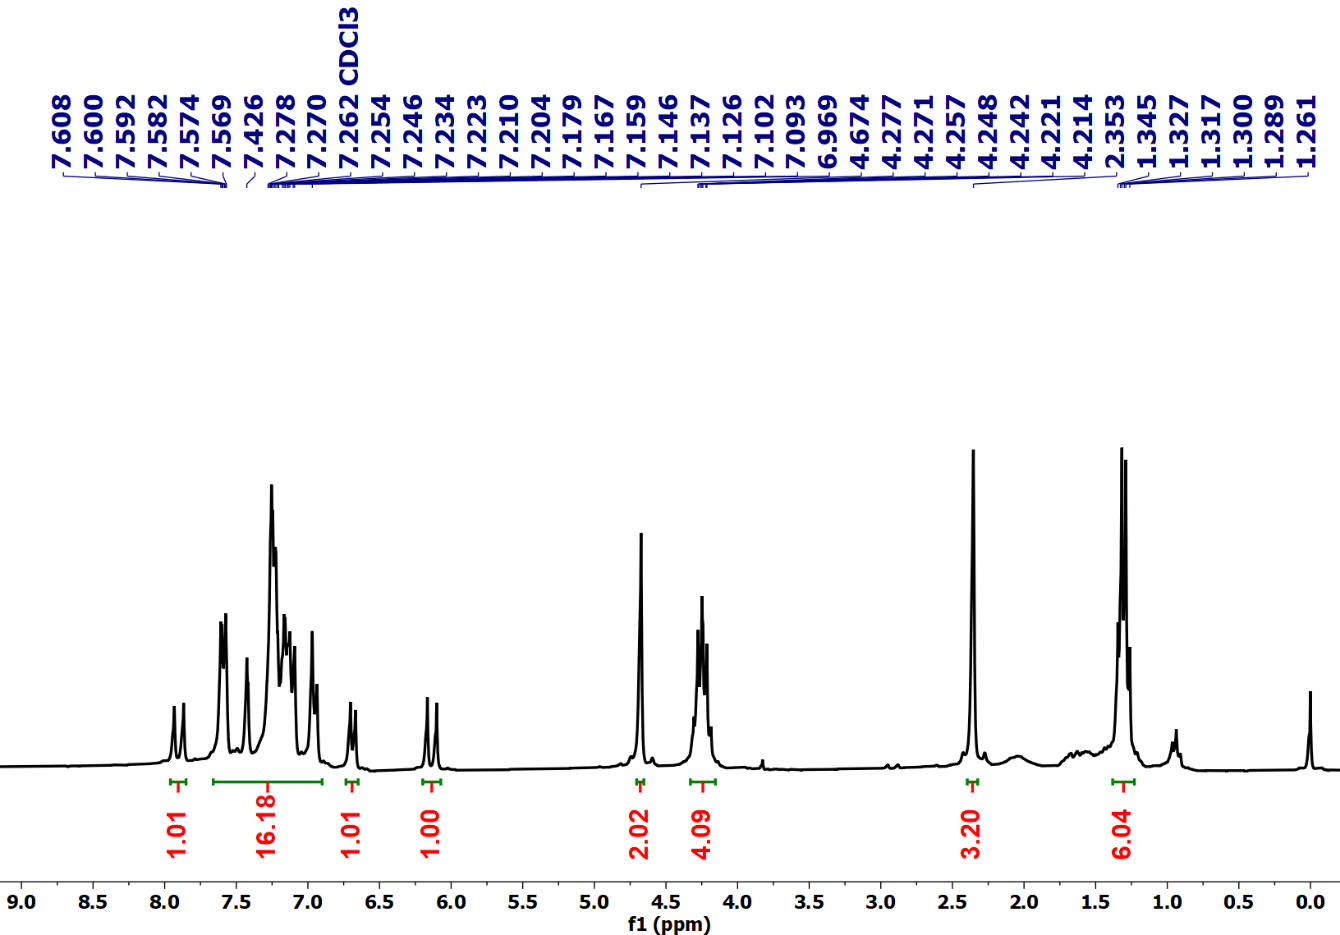
**Figure 99.** 1H NMR spectrum (250 MHz) of compound **4h** in CDCl3.


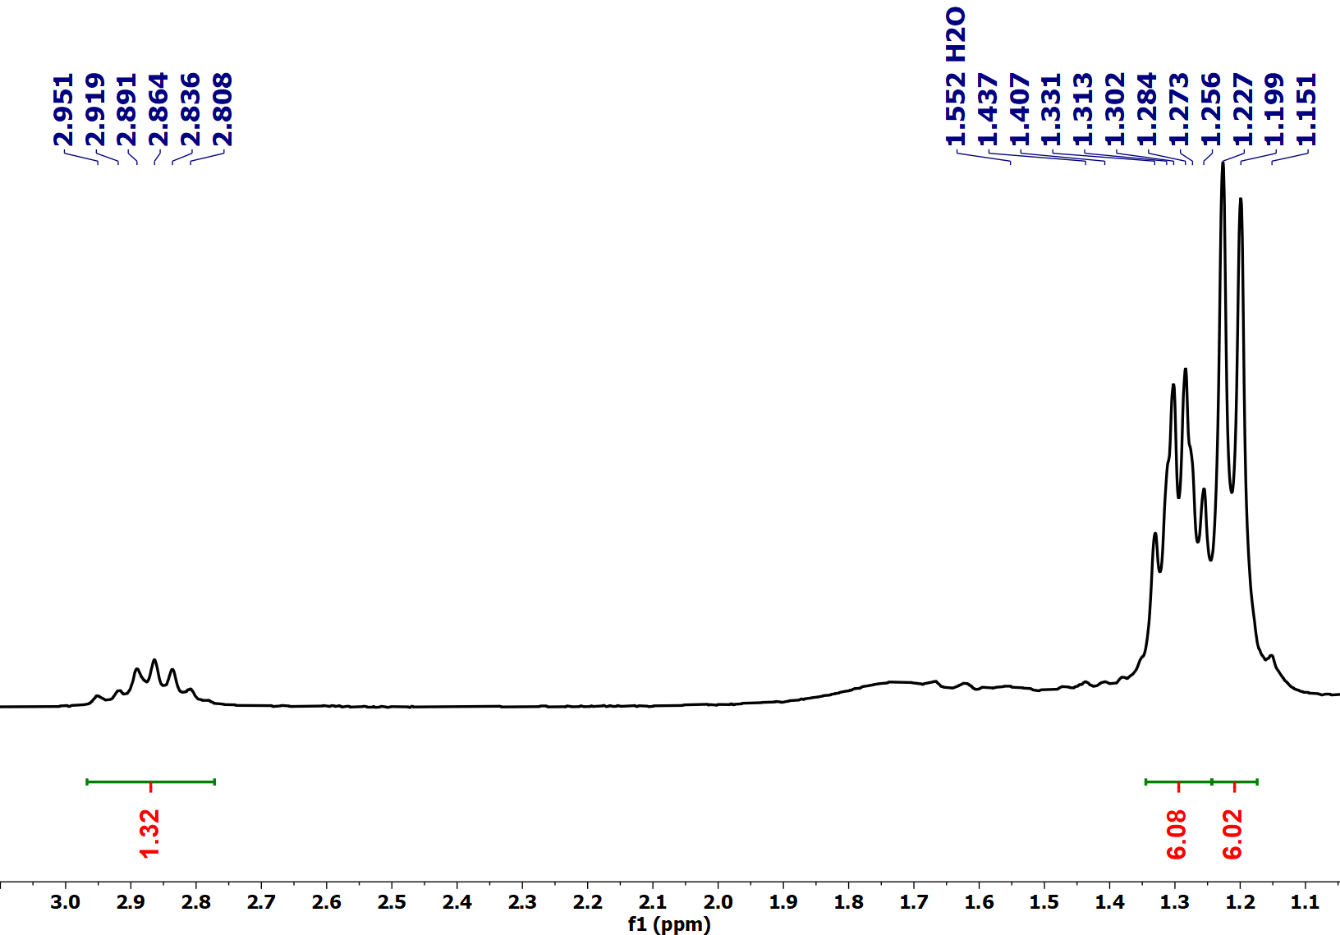
**Figure 100.** Expanded (1) 1H NMR spectrum (250 MHz) of compound **4h** in CDCl3.

**Figure 101.** Expanded (2) 1H NMR spectrum (250 MHz) of compound **4h** in CDCl3.

**Figure 102.** 13C NMR spectrum (65 MHz) of compound **4h** in CDCl3.

**Ethyl 3-(2-ethoxy-2-oxoethyl)-5-(2,4,5-triphenyl-1*H*-imidazol-1-yl)-2,3-dihydro benzofuran-2-carboxylate (5a)**

**Figure 103**. FT-IR spectrum of compound **5a.**

**Figure 104.** 1H NMR spectrum (250 MHz) of compound **5a** in CDCl3.

**Figure 105.** Expanded (1) 1H NMR spectrum (250 MHz) of compound **5a** in CDCl3.

**Figure 106.** Expanded (2) 1H NMR spectrum (250 MHz) of compound **5a** in CDCl3.

**Figure 107.** 13C NMR spectrum (65 MHz) of compound **5a** in CDCl3.

**Ethyl 5-[4,5-diphenyl-2-(*p*-tolyl)-1*H*-imidazol-1-yl]-3-(2-ethoxy-2-oxoethyl)-2,3-dihydrobenzofuran-2-carboxylate (5b)**

**Figure 108**. FT-IR spectrum of compound **5b.**

**Figure 109.** 1H NMR spectrum (250 MHz) of compound **5b** in CDCl3.

**Figure 110.** Expanded (1) 1H NMR spectrum (250 MHz) of compound **5b** in CDCl3.

**Figure 111.** Expanded (2) 1H NMR spectrum (250 MHz) of compound **5b** in CDCl3.

**Figure 112.** 13C NMR spectrum (65 MHz) of compound **5b** in CDCl3.

**Ethyl 3-(2-ethoxy-2-oxoethyl)-5-[2-(4-methoxyphenyl)-4,5-diphenyl-1*H*-imidazol-1-yl]-2,3-dihydrobenzofuran-2-carboxylate (5c)**

**Figure 113**. FT-IR spectrum of compound **5c.**

**Figure 114.** 1H NMR spectrum (250 MHz) of compound **5c** in CDCl3.

**Figure 115.** Expanded (1) 1H NMR spectrum (250 MHz) of compound **5c** in CDCl3.

**Figure 116.** Expanded (2) 1H NMR spectrum (250 MHz) of compound **5c** in CDCl3.

**Figure 117.** 13C NMR spectrum (65 MHz) of compound **5c** in CDCl3.

**Ethyl 3-(2-ethoxy-2-oxoethyl)-5-[2-(3-nitrophenyl)-4,5-diphenyl-1*H*-imidazol-1-yl]-2,3-dihydrobenzofuran-2-carboxylate (5d)**

**Figure 118**. FT-IR spectrum of compound **5d.**

**Figure 119.** 1H NMR spectrum (250 MHz) of compound **5d** in CDCl3.

**Figure 120.** Expanded (1) 1H NMR spectrum (250 MHz) of compound **5d** in CDCl3.

**Figure 121.** Expanded (2) 1H NMR spectrum (250 MHz) of compound **5d** in CDCl3.

**Figure 122.** 13C NMR spectrum (65 MHz) of compound **5d** in CDCl3.

**Ethyl 5-[4,5-diphenyl-2-(thiophen-3-yl)-1*H*-imidazol-1-yl]-3-(2-ethoxy-2-oxoethyl)-2,3-dihydrobenzofuran-2-carboxylate (5e)**

**Figure 123**. FT-IR spectrum of compound **5e.**

**Figure 124.** 1H NMR spectrum (250 MHz) of compound **5e** in CDCl3.

**Figure 125.** Expanded (1) 1H NMR spectrum (250 MHz) of compound **5e** in CDCl3.

**Figure 126.** Expanded (2) 1H NMR spectrum (250 MHz) of compound **5e** in CDCl3.

**Figure 127.** 13C NMR spectrum (65 MHz) of compound **5e** in CDCl3.

**Ethyl 3-(2-ethoxy-2-oxoethyl)-5-[2-(4-isopropylphenyl)-4,5-diphenyl-1H-imidazol-1-yl]-2,3-dihydrobenzofuran-2-carboxylate (5f)**

**Figure 128**. FT-IR spectrum of compound **5f.**

**Figure 129.** 1H NMR spectrum (250 MHz) of compound **5f** in CDCl3.

**Figure 130.** Expanded (1) 1H NMR spectrum (250 MHz) of compound **5f** in CDCl3.

**Figure 131.** Expanded (2) 1H NMR spectrum (250 MHz) of compound **5f** in CDCl3.

**Figure 132.** 13C NMR spectrum (65 MHz) of compound **5f** in CDCl3.

**Ethyl 5-[2-(4-chlorophenyl)-4,5-diphenyl-1*H*-imidazol-1-yl]-3-(2-ethoxy-2-oxoethyl )-2,3-dihydrobenzofuran-2-carboxylate (5g)**

**Figure 133**. FT-IR spectrum of compound **5g.**

**Figure 134.** 1H NMR spectrum (250 MHz) of compound **5g** in CDCl3.

**Figure 135.** Expanded (1) 1H NMR spectrum (250 MHz) of compound **5g** in CDCl3.

**Figure 136.** Expanded (2) 1H NMR spectrum (250 MHz) of compound **5g** in CDCl3.

**Figure 137.** 13C NMR spectrum (65 MHz) of compound **5g** in CDCl3.

**Ethyl 5-[4,5-diphenyl-1-(*p*-tolyl)-1*H*-imidazol-2-yl]-3-(2-ethoxy-2-oxoethyl)-2,3-dihydrobenzofuran-2-carboxylate (5h)**

**Figure 138**. FT-IR spectrum of compound **5h.**

**Figure 139.** 1H NMR spectrum (250 MHz) of compound **5h** in CDCl3.

**Figure 140.** Expanded (1) 1H NMR spectrum (250 MHz) of compound **5h** in CDCl3.

**Figure 141.** Expanded (2) 1H NMR spectrum (250 MHz) of compound **5h** in CDCl3.

**Figure 142.** 13C NMR spectrum (65 MHz) of compound **5g** in CDCl3.

**Ethyl 3-(2-ethoxy-2-oxoethyl)-5-(2,4,5-triphenyl-1*H*-imidazol-1-yl)benzofuran-2-carboxylate (6a)**

**Figure 143**. FT-IR spectrum of compound **6a.**

**Figure 144.** 1H NMR spectrum (250 MHz) of compound **6a** in DMSO-d6.

**Figure 145.** Expanded (1) 1H NMR spectrum (250 MHz) of compound **6a** in DMSO-d6.

**Figure 146.** Expanded (2) 1H NMR spectrum (250 MHz) of compound **6a** in DMSO-d6.

**Figure 147.** Expanded (3) 1H NMR spectrum (250 MHz) of compound **6a** in DMSO-d6.

**Figure 148.** 13C NMR spectrum (65 MHz) of compound **6a** in DMSO-d6.

**Ethyl 5-[4,5-diphenyl-2-(*p*-tolyl)-1*H*-imidazol-1-yl]-3-(2-ethoxy-2-oxoethyl) benzofuran-2-carboxylate (6b)**

**Figure 149**. FT-IR spectrum of compound **6b.**

**Figure 150.** 1H NMR spectrum (250 MHz) of compound **6b** in CDCl3.

**Figure 151.** Expanded (1) 1H NMR spectrum (250 MHz) of compound **6b** in CDCl3.

**Figure 152.** Expanded (2) 1H NMR spectrum (250 MHz) of compound **6b** in CDCl3.

**Figure 153.** Expanded (3) 1H NMR spectrum (250 MHz) of compound **6b** in CDCl3.

**Figure 154.** 13C NMR spectrum (65 MHz) of compound **6b** in CDCl3.

**Ethyl 3-(2-ethoxy-2-oxoethyl)-5-(2-(4-methoxyphenyl)-4,5-diphenyl-1*H*-imidazol-1-yl)benzofuran-2-carboxylate (6c)**

**Figure 155**. FT-IR spectrum of compound **6c.**

**Figure 156.** 1H NMR spectrum (250 MHz) of compound **6c** in CDCl3.

**Figure 157.** Expanded (1) 1H NMR spectrum (250 MHz) of compound **6c** in CDCl3.

**Figure 158.** Expanded (2) 1H NMR spectrum (250 MHz) of compound **6c** in CDCl3.

**Figure 159.** Expanded (3) 1H NMR spectrum (250 MHz) of compound **6c** in CDCl3.

**Figure 160.** 13C NMR spectrum (65 MHz) of compound **6c** in CDCl3.

**Ethyl 3-(2-ethoxy-2-oxoethyl)-5-[2-(3-nitrophenyl)-4,5-diphenyl-1*H*-imidazol-1-yl]benzofuran-2-carboxylate (6d)**

**Figure 161**. FT-IR spectrum of compound **6d.**

**Figure 162.** 1H NMR spectrum (250 MHz) of compound **6d** in DMSO-d6.

**Figure 163.** Expanded (1) 1H NMR spectrum (250 MHz) of compound **6d** in DMSO-d6.

**Figure 164.** Expanded (2) 1H NMR spectrum (250 MHz) of compound **6d** in DMSO-d6.

**Figure 165.** Expanded (3) 1H NMR spectrum (250 MHz) of compound **6d** in DMSO-d6.

**Figure 166.** 13C NMR spectrum (65 MHz) of compound **6d** in DMSO-d6.

**Ethyl 3-(2-ethoxy-2-oxoethyl)-5-[2-(4-isopropylphenyl)-4,5-diphenyl-1*H*-imidazol-1-yl]benzofuran-2-carboxylate (6f)**

**Figure 167**. FT-IR spectrum of compound **6f.**

**Figure 168.** 1H NMR spectrum (400 MHz) of compound **6f** in CDCl3.

**Figure 169.** Expanded (1) 1H NMR spectrum (400 MHz) of compound **6f** in CDCl3.

**Figure 170.** Expanded (2) 1H NMR spectrum (400 MHz) of compound **6f** in CDCl3.

**Figure 171.** Expanded (3) 1H NMR spectrum (400 MHz) of compound **6f** in CDCl3.

**Figure 172.** 13C NMR spectrum (100 MHz) of compound **6f** in CDCl3.

**Ethyl 5-[2-(4-chlorophenyl)-4,5-diphenyl-1*H*-imidazol-1-yl]-3-(2-ethoxy-2-oxoethyl)benzofuran-2-carboxylate (6g)**

**Figure 173**. FT-IR spectrum of compound **6g.**

**Figure 174.** 1H NMR spectrum (250 MHz) of compound **6g** in DMSO-d6.

**Figure 175.** Expanded (1) 1H NMR spectrum (250 MHz) of compound **6g** in DMSO-d6.

**Figure 176.** Expanded (2) 1H NMR spectrum (250 MHz) of compound **6g** in DMSO-d6.

**Figure 177.** Expanded (3) 1H NMR spectrum (250 MHz) of compound **6g** in DMSO-d6.

**Figure 178.** 13C NMR spectrum (65 MHz) of compound **6g** in DMSO-d6.

**Ethyl 5-[4,5-diphenyl-1-(*p*-tolyl)-1*H*-imidazol-2-yl]-3-(2-ethoxy-2-oxoethyl) benzofuran-2-carboxylate (6h)**

**Figure 179**. FT-IR spectrum of compound **6h.**

**Figure 180.** 1H NMR spectrum (250 MHz) of compound **6h** in DMSO-d6.

**Figure 181.** Expanded (1) 1H NMR spectrum (250 MHz) of compound **6h** in DMSO-d6.

**Figure 182.** Expanded (2) 1H NMR spectrum (250 MHz) of compound **6h** in DMSO-d6.

**Figure 183.** 13C NMR spectrum (65 MHz) of compound **6h** in DMSO-d6.

**Figure 184.** UV-Vis spectra of products **2a-d** in ethanol solution (10-5 M).

**Figure 185.** UV-Vis spectra of products **3a-h** in ethanol solution (10-5 M).

**Figure 186.** UV-Vis spectra of products **4a-h** in ethanol solution (10-5 M).

**Figure 187**. UV-Vis spectra of products **5a-g** in ethanol solution (10-5 M).

**Figure 188.** UV-Vis spectra of products **6a-h** in ethanol solution (10-5 M).
